# Supplementary material
Source: publisher figshare collection journal article supplement (https://acs.figshare.com/ndownloader/files/4355944)
Supplement: Supplementary file 1 [file 4355944]

## *Supporting information*

### **Organocatalytic Enantioselective Friedel-Crafts Reactions of 1-Naphthols with Aldimines**

Guixia Liu,<sup>†</sup> Shilei Zhang,<sup>†</sup> Hao Li,<sup>‡</sup> Tangzhi Zhang,<sup>†</sup> and Wei Wang<sup>†,‡\*</sup>

<sup>†</sup>*Department of Chemistry and Chemical Biology, University of New Mexico, Albuquerque, NM 87131-0001*

<sup>‡</sup>*Shanghai Institute of Materia Medica, Chinese Academy of Sciences, 555 Zuchongzhi Road, Shanghai 201203, China*

**General.** Commercial reagents were used as received, unless otherwise stated. Merck 60 silica gel was used for chromatography, and Whatman silica gel plates with fluorescence F<sub>254</sub> were used for thin-layer chromatography (TLC) analysis. <sup>1</sup>H and <sup>13</sup>C NMR spectra were recorded on Bruker Avance 500, and tetramethylsilane (TMS) was used as a reference. Data for <sup>1</sup>H are reported as follows: chemical shift (ppm), and multiplicity (s = singlet, d = doublet, t = triplet, q = quartet, m = multiplet). Data for <sup>13</sup>C NMR are reported as ppm.

### General Procedure for Asymmetric Friedel-Crafts Reaction of Naphthol with Imines

To a vial containing imine (0.2 mmol), naphthol (1.0 mmol) and 1.0 mL of anhydrous toluene was added catalyst (0.02 mmol). The reaction mixture was stirred at 0 °C. After the reaction was completed as monitored by TLC, the reaction mixture was purified by silica gel chromatography, eluting with EtOAc/hexane (1/5) to provide the desired product.

#### N-((1-Hydroxynaphthalen-2-yl)(phenyl)methyl)-4-methylbenzenesulfonamide (Table 2, entry 1)

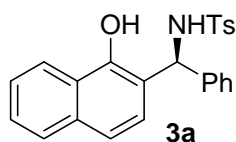

According to the general procedure, the title compound was synthesized in 80% yield. <sup>1</sup>H NMR (500 MHz, CDCl<sub>3</sub>): δ 8.05-8.04 (m, 1H), 7.72-7.71 (m, 1H), 7.54-7.45 (m, 4H), 7.26-7.18 (m, 5H), 6.95-6.73 (m, 4H), 5.91 (d, *J* = 7.0 Hz, 1H), 5.46 (d, *J* = 7.5 Hz, 1H), 2.17 (s, 3H); <sup>13</sup>C NMR (125 MHz, CDCl<sub>3</sub>): δ 149.4, 143.6, 139.0, 136.1, 134.1, 129.2, 128.7, 127.8, 127.5, 127.1, 127.0, 126.5, 126.2, 125.5, 125.2, 121.3, 120.6, 119.5, 58.6, 21.1; HR-MS: calcd (*M* + Na<sup>+</sup>) for C<sub>24</sub>H<sub>21</sub>NO<sub>3</sub>S, 426.1140; found 426.1150; elemental analysis for C<sub>24</sub>H<sub>21</sub>NO<sub>3</sub>S: calcd C 71.44, H 5.25 N 3.47; found C 71.51, H 5.31, N 3.38; HPLC (Chiralpak AS-H, *i*-PrOH/hexane = 40/60, flow rate = 0.6 mL/min, λ = 235 nm): *t*<sub>minor</sub> = 22.48 min, *t*<sub>major</sub> = 31.29 min, ee = 94%; [α]<sub>D</sub><sup>22</sup> = -38.8 (*c* = 1.0 in CH<sub>2</sub>Cl<sub>2</sub>).

#### N-((1-Hydroxynaphthalen-2-yl)(4-nitrophenyl)methyl)-4-methylbenzenesulfonamide (Table 2, entry 2)

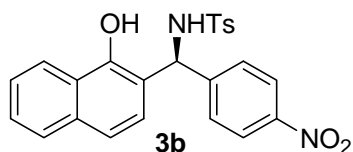

According to the general procedure, the title compound was synthesized in 88% yield. <sup>1</sup>H NMR (500 MHz, CDCl<sub>3</sub>): δ 8.00 (d, *J* = 8.5 Hz, 2H), 7.93-7.92 (m, 1H), 7.75-7.73 (m, 1H), 7.51-7.48 (m, 4H), 7.37 (d, *J* = 8.5 Hz, 2H), 7.27 (d, *J* = 9.0 Hz, 1H), 6.90 (d, *J* = 8.5 Hz, 2H), 6.86 (d, *J* = 8.5 Hz, 1H), 5.97 (s, 1H), 2.14 (s, 3H); <sup>13</sup>C NMR (125 MHz, CDCl<sub>3</sub>): δ 148.7, 147.1, 143.9, 136.2, 134.2, 129.3, 128.0, 127.8, 126.9, 126.1, 125.8, 124.6, 123.5, 121.3, 120.2, 119.3, 57.8, 21.2; HR-MS: calcd (*M* + Na<sup>+</sup>) for C<sub>24</sub>H<sub>20</sub>N<sub>2</sub>O<sub>5</sub>S, 471.0991; found 471.0003; elemental analysis for C<sub>24</sub>H<sub>20</sub>N<sub>2</sub>O<sub>5</sub>S: calcd C 64.27, H 4.49, N 6.25; found C 64.08, H 4.43, N 6.31; HPLC (Chiralpak AS-H, *i*-PrOH/hexane = 40/60, flow rate = 0.6 mL/min, λ = 254 nm): *t*<sub>minor</sub> = 34.29 min, *t*<sub>major</sub> = 50.04 min, ee = 95%; [α]<sub>D</sub><sup>22</sup> = -73.4 (*c* = 1.0 in CH<sub>2</sub>Cl<sub>2</sub>).

***N*-((1-Hydroxynaphthalen-2-yl)(3-nitrophenyl)methyl)-4-methylbenzenesulfonamide** (Table 2, entry 3)

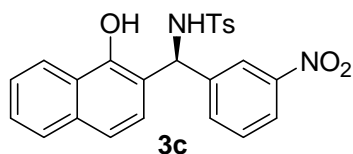

According to the general procedure, the title compound was synthesized in 91% yield.  $^1\text{H}$  NMR (500 MHz,  $\text{CDCl}_3$ ):  $\delta$  8.04 (s, 1H), 7.94 (d,  $J = 7.0$  Hz, 1H), 7.75 (d,  $J = 8.0$  Hz, 1H), 7.61-7.28 (m, 7H), 6.95 (d,  $J = 8.0$  Hz, 2H), 6.89 (d,  $J = 8.0$  Hz, 1H), 6.44 (s, 1H), 6.01 (d,  $J = 8.5$  Hz, 1H), 5.88 (d,  $J = 8.5$  Hz, 1H), 2.16 (s, 3H);  $^{13}\text{C}$  NMR (125 MHz,  $\text{CDCl}_3$ ):  $\delta$  148.8, 148.3, 143.8, 142.0, 136.3, 134.3, 133.3, 129.4, 129.3, 128.0, 127.0, 126.9, 126.1, 125.7, 124.7, 122.5, 121.9, 121.4, 120.3, 119.3, 57.6, 21.2; HR-MS: calcd ( $\text{M} + \text{Na}^+$ ) for  $\text{C}_{24}\text{H}_{20}\text{N}_2\text{O}_5\text{S}$ , 471.0991; found 471.0994; elemental analysis for  $\text{C}_{24}\text{H}_{20}\text{N}_2\text{O}_5\text{S}$ : calcd C 64.27, H 4.49, N 6.25; found C 64.38, H 4.42, N 6.19; HPLC (Chiralpak OD-H, *i*-PrOH/hexane = 15/85, flow rate = 0.6 mL/min,  $\lambda = 254$  nm):  $t_{\text{minor}} = 25.57$  min,  $t_{\text{major}} = 32.85$  min, ee = 94%;  $[\alpha]_{\text{D}}^{22} = -44.6$  ( $c = 1.0$  in  $\text{CH}_2\text{Cl}_2$ ).

***N*-((1-Hydroxynaphthalen-2-yl)(2-nitrophenyl)methyl)-4-methylbenzenesulfonamide** (Table 2, entry 4)

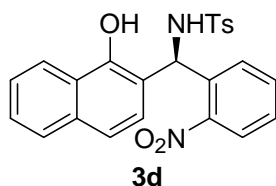

According to the general procedure, the title compound was synthesized in 89% yield.  $^1\text{H}$  NMR (500 MHz,  $\text{CDCl}_3$ ):  $\delta$  8.15-8.14 (m, 1H), 7.75-7.73 (m, 1H), 7.82-7.68 (m, 3H), 7.58-7.36 (m, 6H), 7.26-7.19 (m, 1H), 7.04 (d,  $J = 7.5$  Hz, 2H), 6.91 (s, 1H), 6.71 (d,  $J = 8.5$  Hz, 1H), 6.66 (d,  $J = 7.0$  Hz, 1H), 5.84 (s, 1H), 2.28 (s, 3H);  $^{13}\text{C}$  NMR (125 MHz,  $\text{CDCl}_3$ ):  $\delta$  149.8, 148.0, 144.0, 135.8, 134.3, 133.3, 129.9, 129.7, 129.6, 128.7, 127.5, 127.2, 126.9, 126.4, 125.7, 125.1, 124.4, 121.8, 120.5, 118.0, 53.5, 21.4; HR-MS: calcd ( $\text{M} + \text{Na}^+$ ) for  $\text{C}_{24}\text{H}_{20}\text{N}_2\text{O}_5\text{S}$ , 471.0991; found 471.0982; elemental analysis for  $\text{C}_{24}\text{H}_{20}\text{N}_2\text{O}_5\text{S}$ : calcd C 64.27, H 4.49, N 6.25; found C 64.34, H 4.54, N 6.22  $[\alpha]_{\text{D}}^{22} = -57.0$  ( $c = 1.0$  in  $\text{CH}_2\text{Cl}_2$ ).

***N*-((4-Chlorophenyl)(1-hydroxynaphthalen-2-yl)methyl)-4-methylbenzenesulfonamide** (Table 2, entry 5)

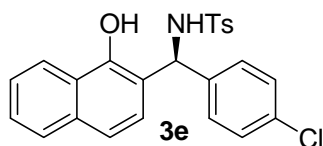

According to the general procedure, the title compound was synthesized in 66% yield.  $^1\text{H}$  NMR (500 MHz,  $\text{CDCl}_3$ ):  $\delta$  8.02-7.80 (m, 1H), 7.72-7.70 (m, 1H), 7.48-7.44 (m, 4H), 7.25 (d,  $J = 8.5$  Hz, 1H), 7.17-7.10 (m, 4H), 6.89 (d,  $J = 8.0$  Hz, 2H), 6.85 (d,  $J = 8.5$  Hz, 1H), 6.71 (s, 1H), 5.89 (d,  $J = 8.5$  Hz, 1H), 5.80-5.79 (m, 1H), 2.15 (s, 3H);  $^{13}\text{C}$  NMR (125 MHz,  $\text{CDCl}_3$ ):  $\delta$  149.1, 143.7, 137.8, 136.2, 134.2, 133.5, 129.2, 128.6, 128.5, 127.7, 127.0, 126.6, 125.9, 125.8, 125.0, 120.9, 120.8, 119.5, 57.9, 21.2; HR-MS: calcd ( $\text{M} + \text{Na}^+$ ) for  $\text{C}_{24}\text{H}_{20}\text{ClNO}_3\text{S}$ , 460.0750; found 460.0745;

elemental analysis for  $C_{24}H_{20}ClNO_3S$ : calcd C 65.82, H 4.60, N 3.20; found C 65.94, H 4.58, N 3.31; HPLC (Chiralpak AS-H, *i*-PrOH/hexane = 40/60, flow rate = 0.6 mL/min,  $\lambda$  = 254 nm):  $t_{\text{minor}}$  = 16.31 min,  $t_{\text{major}}$  = 22.02 min, ee = 93%;  $[\alpha]_D^{22}$  = -27.6 ( $c$  = 1.0 in  $CH_2Cl_2$ ).

***N*-((2-Chlorophenyl)(1-hydroxynaphthalen-2-yl)methyl)-4-methylbenzenesulfonamide** (Table 2, entry 6)

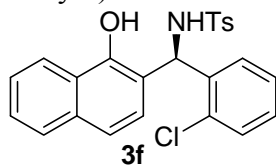

According to the general procedure, the title compound was synthesized in 79% yield.  $^1H$  NMR (500 MHz,  $CDCl_3$ ):  $\delta$  8.23-8.21 (m, 1H), 7.72-7.70 (m, 1H), 7.57 (d,  $J$  = 8.0 Hz, 2H), 7.49-7.47 (m, 2H), 7.30-7.15 (m, 2H), 7.02 (d,  $J$  = 8.0 Hz, 2H), 6.73 (d,  $J$  = 8.5 Hz, 1H), 6.20 (d,  $J$  = 7.0 Hz, 1H), 5.40 (d,  $J$  = 7.0 Hz, 1H), 2.26 (s, 3H);  $^{13}C$  NMR (125 MHz,  $CDCl_3$ ):  $\delta$  150.6, 144.0, 135.5, 135.4, 134.3, 133.0, 130.1, 129.1, 127.4, 127.0, 126.8, 125.5, 125.4, 125.1, 122.1, 120.1, 117.0, 56.2, 21.4; HR-MS: calcd ( $M + Na^+$ ) for  $C_{24}H_{20}ClNO_3S$ , 460.0750; found 460.0753; elemental analysis for  $C_{24}H_{20}ClNO_3S$ : calcd C 65.82, H 4.60, N 3.20; found C 65.91, H 4.64, N 3.15; HPLC (Chiralpak AS-H, *i*-PrOH/hexane = 40/60, flow rate = 0.6 mL/min,  $\lambda$  = 254 nm):  $t_{\text{minor}}$  = 40.26 min,  $t_{\text{major}}$  = 26.40 min, ee = 96%;  $[\alpha]_D^{22}$  = -63.0 ( $c$  = 1.0 in  $CH_2Cl_2$ ).

***N*-((4-Bromophenyl)(1-hydroxynaphthalen-2-yl)methyl)-4-methylbenzenesulfonamide** (Table 2, entry 7)

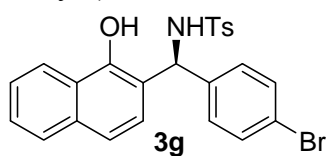

According to the general procedure, the title compound was synthesized in 81% yield.  $^1H$  NMR (500 MHz,  $CDCl_3$ ):  $\delta$  8.01-7.99 (m, 1H), 7.70-7.69 (m, 1H), 7.44 (d,  $J$  = 8.5 Hz, 4H), 7.27 (d,  $J$  = 8.5 Hz, 2H), 7.21 (d,  $J$  = 8.5 Hz, 1H), 7.04 (d,  $J$  = 8.0 Hz, 2H), 6.84 (d,  $J$  = 7.0 Hz, 4H), 6.02 (s, 1H), 5.86 (s, 1H), 2.12 (s, 3H);  $^{13}C$  NMR (125 MHz,  $CDCl_3$ ):  $\delta$  149.0, 143.6, 138.3, 136.1, 134.1, 131.5, 129.1, 128.8, 127.7, 126.9, 126.5, 126.0, 125.7, 124.9, 121.5, 120.9, 120.8, 119.4, 57.9, 21.2; HR-MS: calcd ( $M + Na^+$ ) for  $C_{24}H_{20}BrNO_3S$ , 504.0245; found 504.0244; elemental analysis for  $C_{24}H_{20}BrNO_3S$ : calcd C 59.76, H 4.18, N 2.90; found C 59.94, H 4.39, N 2.84; HPLC (Chiralpak AS-H, *i*-PrOH/hexane = 40/60, flow rate = 0.6 mL/min,  $\lambda$  = 254 nm):  $t_{\text{minor}}$  = 17.23 min,  $t_{\text{major}}$  = 24.22 min, ee = 93%;  $[\alpha]_D^{22}$  = -27.0 ( $c$  = 1.0 in  $CH_2Cl_2$ ).

***N*-((1-Hydroxynaphthalen-2-yl)(4-methoxyphenyl)methyl)-4-methylbenzenesulfonamide** (Table 2, entry 8)

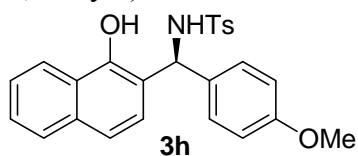

According to the general procedure, the title compound was synthesized in 62% yield.  $^1H$  NMR (500 MHz,  $CDCl_3$ ):  $\delta$  8.05-8.03 (m, 1H), 7.72-7.71 (m, 1H), 7.53-7.45 (m, 4H), 7.26-7.25 (m, 1H),



7.10 (d,  $J = 8.5$  Hz, 2H), 6.96-6.92 (m, 3H), 6.76 (d,  $J = 9.0$  Hz, 3H), 5.84 (d,  $J = 6.5$  Hz, 1H), 5.34 (d,  $J = 6.5$  Hz, 1H), 3.75 (s, 3H), 2.18 (s, 3H);  $^{13}\text{C}$  NMR (125 MHz,  $\text{CDCl}_3$ ):  $\delta$  159.2, 149.4, 143.6, 136.1, 134.1, 130.9, 129.1, 128.4, 127.5, 127.2, 126.4, 126.2, 125.5, 125.2, 121.3, 120.5, 119.4, 114.1, 58.5, 55.3, 21.2; HR-MS: calcd ( $\text{M} + \text{Na}^+$ ) for  $\text{C}_{25}\text{H}_{23}\text{NO}_4\text{S}$ , 456.1245; found 456.1239; elemental analysis for  $\text{C}_{25}\text{H}_{23}\text{NO}_4\text{S}$ : calcd C 69.26, H 5.35, N 3.23; found C 69.01, H 5.21, N 3.11; HPLC (Chiralpak AS-H, *i*-PrOH/hexane = 40/60, flow rate = 0.6 mL/min,  $\lambda = 254$  nm):  $t_{\text{minor}} = 34.29$  min,  $t_{\text{major}} = 50.04$  min, ee = 95%;  $[\alpha]_{\text{D}}^{22} = -73.4$  ( $c = 1.0$  in  $\text{CH}_2\text{Cl}_2$ ).

***N*-((1-Hydroxynaphthalen-2-yl)(2-methoxyphenyl)methyl)-4-methylbenzenesulfonamide** (Table 2, entry 9)

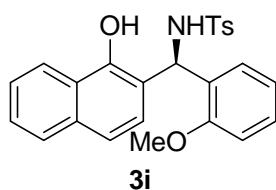

According to the general procedure, the title compound was synthesized in 76% yield.  $^1\text{H}$  NMR (500 MHz, DMSO):  $\delta$  9.22 (s, 1H), 8.23 (d,  $J = 9.0$  Hz, 1H), 8.12-8.10 (m, 1H), 7.77-7.75 (m, 1H), 7.52 (d,  $J = 8.0$  Hz, 2H), 7.46 (d,  $J = 8.5$  Hz, 1H), 7.42-7.40 (m, 2H), 7.30 (d,  $J = 8.5$  Hz, 1H), 7.15-7.09 (m, 4H), 6.80 (d,  $J = 8.0$  Hz, 1H), 6.75 (d,  $J = 7.5$  Hz, 1H), 6.46 (d,  $J = 8.5$  Hz, 1H), 3.36 (s, 3H), 2.22 (s, 3H);  $^{13}\text{C}$  NMR (125 MHz, DMSO):  $\delta$  156.0, 148.5, 141.7, 138.8, 133.2, 129.4, 128.7, 128.4, 128.1, 121.4, 126.3, 126.1, 125.5, 124.8, 124.6, 123.2, 121.8, 119.7, 118.7, 110.6, 55.1, 49.6, 20.8; HR-MS: calcd ( $\text{M} + \text{Na}^+$ ) for  $\text{C}_{25}\text{H}_{23}\text{NO}_4\text{S}$ , 456.1245; found 456.1249; elemental analysis for  $\text{C}_{25}\text{H}_{23}\text{NO}_4\text{S}$ : calcd C 69.26, H 5.35, N 3.23; found C 70.02, H 5.49, N 3.04;  $[\alpha]_{\text{D}}^{22} = -76.4$  ( $c = 1.0$  in  $\text{CH}_2\text{Cl}_2$ ).

***N*-((1-Hydroxynaphthalen-2-yl)(naphthalen-2-yl)methyl)-4-methylbenzenesulfonamide** (Table 2, entry 10)

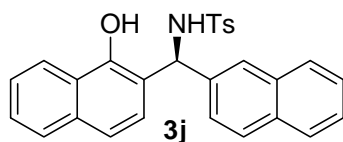

According to the general procedure, the title compound was synthesized in 77% yield.  $^1\text{H}$  NMR (500 MHz,  $\text{CD}_3\text{Cl}$ ):  $\delta$  8.09-8.07 (m, 1H), 7.76-7.72 (m, 4H), 7.71-7.43 (m, 7H), 7.27-7.22 (m, 2H), 6.90-6.80 (m, 4H), 6.09 (d,  $J = 7.5$  Hz, 1H), 5.65 (d,  $J = 7.5$  Hz, 1H), 2.54 (s, 3H);  $^{13}\text{C}$  NMR (125 MHz,  $\text{CDCl}_3$ ):  $\delta$  149.6, 143.6, 136.1, 134.2, 133.0, 132.7, 129.1, 128.6, 128.0, 127.6, 127.1, 126.6, 126.4, 126.3, 126.1, 125.8, 125.6, 125.2, 125.0, 121.4, 120.6, 119.4, 58.6, 21.2; HR-MS: calcd ( $\text{M} + \text{Na}^+$ ) for  $\text{C}_{28}\text{H}_{23}\text{NO}_3\text{S}$ , 476.1296; found 476.1291; elemental analysis for  $\text{C}_{28}\text{H}_{23}\text{NO}_3\text{S}$ : calcd C 74.15, H 5.11, N 3.09; found C 74.92, H 5.03, N 3.20; HPLC (Chiralpak AS-H, *i*-PrOH/hexane = 40/60, flow rate = 0.6 mL/min,  $\lambda = 254$  nm):  $t_{\text{minor}} = 23.81$  min,  $t_{\text{major}} = 32.42$  min, ee = 94%;  $[\alpha]_{\text{D}}^{22} = -42.6$  ( $c = 1.0$  in  $\text{CH}_2\text{Cl}_2$ ).

***N*-(Furan-2-yl(1-hydroxynaphthalen-2-yl)methyl)-4-methylbenzenesulfonamide** (Table 2, entry 11)

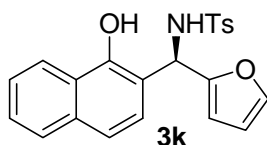

According to the general procedure, the title compound was synthesized in 92% yield.  $^1\text{H}$  NMR (500 MHz,  $\text{CDCl}_3$ ):  $\delta$  8.09 (m, 1H), 7.72 (m, 1H), 7.62 (d,  $J = 4.8$  Hz, 2H), 7.47-7.45 (m, 2H), 7.31-7.28 (m, 2H), 6.99-6.93 (m, 4H), 6.22 (m, 1H), 6.03 (m, 1H), 5.89 (d,  $J = 4.0$  Hz, 1H), 5.44 (d,  $J = 4.0$  Hz, 1H), 2.20 (s, 3H);  $^{13}\text{C}$  NMR (125 MHz,  $\text{CDCl}_3$ ):  $\delta$  143.7, 142.8, 134.5, 129.2, 127.4, 126.7, 125.7, 125.4, 121.8, 120.4, 116.9, 110.5, 108.6, 53.5, 29.7, 25.3, 21.3; HR-MS: calcd ( $\text{M} + \text{Na}^+$ ) for  $\text{C}_{22}\text{H}_{19}\text{NO}_4\text{S}$ , 416.0932; found 416.0927; elemental analysis for  $\text{C}_{22}\text{H}_{19}\text{NO}_4\text{S}$ : calcd C 67.16, H 4.87, N 3.56; found C 66.89, H 4.77, N 3.44; HPLC (Chiralpak AS-H, *i*-PrOH/hexane = 40/60, flow rate = 0.6 mL/min,  $\lambda = 254$  nm):  $t_{\text{minor}} = 31.15$  min,  $t_{\text{major}} = 34.96$  min, ee = 93%;  $[\alpha]_{\text{D}}^{22} = -41.1$  ( $c = 1.0$  in  $\text{CH}_2\text{Cl}_2$ ).

***N*-(1-(1-Hydroxynaphthalen-2-yl)-3-methylbutyl)-4-methylbenzenesulfonamide** (Table 2, entry 12)

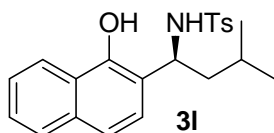

According to the general procedure, the title compound was synthesized in 63% yield.  $^1\text{H}$  NMR (500 MHz,  $\text{CDCl}_3$ ):  $\delta$  7.97 (m, 1H), 7.69 (m, 1H), 7.47-7.42 (m, 4H), 7.25 (s, 1H), 7.02 (d,  $J = 4.8$  Hz, 1H), 6.85 (d,  $J = 4.8$  Hz, 1H), 6.70 (m, 1H), 5.23 (d,  $J = 4.0$  Hz, 1H), 4.72 (m, 1H), 2.08 (s, 3H), 1.77-1.43 (s, 3), 0.88 (d,  $J = 11.2$  Hz, 3H), 0.83 (d,  $J = 11.2$  Hz, 3H);  $^{13}\text{C}$  NMR (125 MHz,  $\text{CDCl}_3$ ):  $\delta$  149.0, 143.3, 136.6, 133.9, 128.9, 127.5, 126.9, 126.2, 125.3, 125.2, 121.0, 120.6, 119.9, 53.6, 44.0, 24.7, 22.4, 22.1, 21.1; HR-MS: calcd ( $\text{M} + \text{Na}^+$ ) for  $\text{C}_{22}\text{H}_{25}\text{NO}_3\text{S}$  406.1453; found 406.1454; elemental analysis for  $\text{C}_{22}\text{H}_{25}\text{NO}_3\text{S}$ : calcd C 68.90, H 6.57, N 3.65; found C 69.16, H 6.45, N 3.61; HPLC (Chiralpak OJ-H, *i*-PrOH/hexane = 13/87, flow rate = 0.45 mL/min,  $\lambda = 254$  nm):  $t_{\text{majorr}} = 18.07$  min,  $t_{\text{minor}} = 26.98$  min, ee = 90%;  $[\alpha]_{\text{D}}^{22} = -40.0$  ( $c = 1.0$  in  $\text{CH}_2\text{Cl}_2$ ).

***N*-(1-(1-Hydroxynaphthalen-2-yl)pentyl)-4-methylbenzenesulfonamide** (Table 2, entry 13)

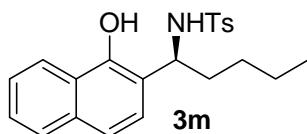

According to the general procedure, the title compound was synthesized in 87% yield.  $^1\text{H}$  NMR (500 MHz,  $\text{CDCl}_3$ ):  $\delta$  7.98 (m, 1H), 7.69 (m, 1H), 7.48 (d,  $J = 4.8$  Hz, 2H), 7.42 (m, 2H), 7.25 (m, 1H), 7.01 (d,  $J = 5.0$  Hz, 1H), 6.85 (d,  $J = 4.6$  Hz, 2H), 6.80 (s, 1H), 5.44 (m, 1H), 4.60 (m, 1H), 2.07 (s, 3H), 1.82 (m, 2H), 1.25 (m, 4H), 1.08 (m, 1H), 0.75 (t,  $J = 4.0$  Hz, 3H);  $^{13}\text{C}$  NMR (125 MHz,  $\text{CDCl}_3$ ):  $\delta$  149.0, 143.3, 136.5, 133.8, 128.9, 127.4, 126.9, 126.1, 125.4, 125.3, 125.2, 121.1, 120.5, 119.9, 55.7, 34.8, 28.3, 22.1, 21.1, 13.7; HR-MS: calcd ( $\text{M} + \text{Na}^+$ ) for  $\text{C}_{22}\text{H}_{25}\text{NO}_3\text{S}$ , 406.1453; found 406.1451; elemental analysis for  $\text{C}_{22}\text{H}_{25}\text{NO}_3\text{S}$ : calcd C 68.90, H 6.57, N 3.65; found C 69.12, H 6.63, N 3.58; HPLC (Chiralpak OJ-H, *i*-PrOH/hexane = 11/89, flow rate = 0.4 mL/min,  $\lambda = 254$  nm):  $t_{\text{majorr}} = 28.17$  min,  $t_{\text{minor}} = 37.55$  min, ee = 92%;  $[\alpha]_{\text{D}}^{22} = -38.2$  ( $c = 1.0$  in  $\text{CH}_2\text{Cl}_2$ ).

***N*-((4-Chloro-1-hydroxynaphthalen-2-yl)(phenyl)methyl)benzenesulfonamide** (Table 2, entry 14)

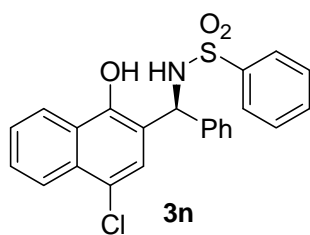

According to the general procedure, the title compound was synthesized in 100% yield.  $^1\text{H}$  NMR (500 MHz,  $\text{CDCl}_3$ ):  $\delta$  8.12 (d,  $J$  = 8.5 Hz, 1H), 8.08 (d,  $J$  = 8.0 Hz, 1H), 7.64-7.49 (m, 4H), 7.29-7.14 (m, 8H), 6.97 (s, 1H), 6.94 (s, 1H), 5.91 (d,  $J$  = 8.0 Hz, 1H), 5.85-5.77 (m, 1H);  $^{13}\text{C}$  NMR (125 MHz,  $\text{CDCl}_3$ ):  $\delta$  148.7, 139.0, 138.1, 132.7, 130.9, 128.8, 128.7, 128.0, 127.6, 127.0, 126.9, 126.3, 125.7, 124.3, 123.5, 122.0, 120.1, 57.9; HR-MS: calcd ( $\text{M} + \text{Na}^+$ ) for  $\text{C}_{23}\text{H}_{18}\text{ClNO}_3\text{S}$ , 446.0594; found 446.0599; elemental analysis for  $\text{C}_{23}\text{H}_{18}\text{ClNO}_3\text{S}$ : calcd C 65.17, H 4.28, N 3.30; found C 65.49, H 4.41, N 3.19; HPLC (Chiralpak AS-H, *i*-PrOH/hexane = 40/60, flow rate = 0.6 mL/min,  $\lambda$  = 254 nm):  $t_{\text{minor}}$  = 19.60 min,  $t_{\text{major}}$  = 37.16 min, ee = 94%;  $[\alpha]_{\text{D}}^{22}$  = -65.4 ( $c$  = 1.0 in  $\text{CH}_2\text{Cl}_2$ ).

***N*-((1-Hydroxy-4-methoxynaphthalen-2-yl)(phenyl)methyl)benzenesulfonamide** (Table 2, entry 15)

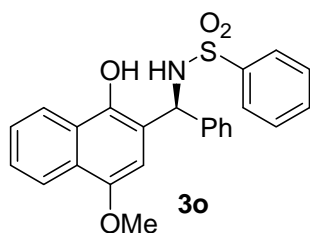

According to the general procedure, the title compound was synthesized in 97% yield.  $^1\text{H}$  NMR (500 MHz,  $\text{CDCl}_3$ ):  $\delta$  8.09 (s, 2H), 7.95 (s, 1H), 7.62 (d,  $J$  = 7.5 Hz, 2H), 7.46 (s, 2H), 7.25-7.23 (m, 6H), 7.11-7.09 (m, 2H), 6.21 (s, 1H), 5.92 (s, 2H), 5.84 (s, 1H), 3.71 (s, 3H);  $^{13}\text{C}$  NMR (125 MHz,  $\text{CDCl}_3$ ):  $\delta$  149.8, 142.5, 139.6, 139.2, 132.4, 128.6, 128.5, 127.8, 126.9, 126.3, 125.9, 121.9, 120.9, 120.0, 103.8, 58.5, 55.5; HR-MS: calcd ( $\text{M} + \text{Na}^+$ ) for  $\text{C}_{24}\text{H}_{21}\text{NO}_4\text{S}$ , 442.1089; found 442.1094; C, H, N analysis for  $\text{C}_{24}\text{H}_{21}\text{NO}_4\text{S}$ : calcd C 68.72, H 5.05, N 3.34; found C 68.95, H 4.96, N 3.55; HPLC (Chiralpak AS-H, *i*-PrOH/hexane = 40/60, flow rate = 0.6 mL/min,  $\lambda$  = 254 nm):  $t_{\text{minor}}$  = 20.76 min,  $t_{\text{major}}$  = 44.58 min, ee = 95%;  $[\alpha]_{\text{D}}^{22}$  = -45.2 ( $c$  = 1.0 in  $\text{CH}_2\text{Cl}_2$ ).

***N*-((1-Hydroxynaphthalen-2-yl)(phenyl)methyl)benzenesulfonamide** (Table 2, entry 16)

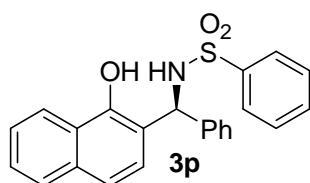

According to the general procedure, the title compound was synthesized in 83% yield.  $^1\text{H}$  NMR (500 MHz, DMSO):  $\delta$  9.49-9.48 (m, 1H), 8.76-8.75 (m, 1H), 8.14 (s, 1H), 7.74-7.64 (m, 3H), 7.43-7.13 (m, 12H), 6.33-6.31 (m, 1H);  $^{13}\text{C}$  NMR (125 MHz, DMSO):  $\delta$  148.2, 141.9, 141.3, 133.2, 131.7, 128.4, 127.9, 127.4, 126.8, 126.6, 126.2, 125.7, 125.2, 124.9, 123.1, 122.0, 119.5, 54.2;

HR-MS: calcd ( $M + Na^+$ ) for  $C_{23}H_{19}NO_3S$ , 412.0983; found 412.0985; elemental analysis for  $C_{23}H_{19}NO_3S$ : calcd C 70.93, H 4.92, N 3.60; found C 70.14, H 4.99, N 3.58; HPLC (Chiralpak AS-H, *i*-PrOH/hexane = 40/60, flow rate = 0.6 mL/min,  $\lambda$  = 254 nm):  $t_{\text{minor}}$  = 22.87 min,  $t_{\text{major}}$  = 38.6 min, ee = 94%;  $[\alpha]_D^{22}$  = -40.1 ( $c$  = 1.0 in  $CH_2Cl_2$ ).

***N*-((1-Hydroxynaphthalen-2-yl)(phenyl)methyl)-4-nitrobenzenesulfonamide (Table 2, entry 17)**

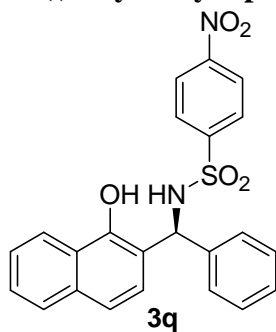

According to the general procedure, the title compound was synthesized in 94% yield.  $^1H$  NMR (300 MHz,  $CDCl_3:CD_3OD$  = 10:1):  $\delta$  7.82-7.78 (m, 1H), 7.69-7.56 (m, 5H), 7.34-7.30 (m, 2H), 7.29-7.23 (m, 2H), 7.20-7.12 (m, 4H), 6.94-6.92 (m, 1H), 5.94 (s, 1H);  $^{13}C$  NMR (75 MHz,  $CDCl_3:CD_3OD$  = 10:1):  $\delta$  149.1, 148.7, 145.7, 139.6, 133.9, 128.2, 127.7, 127.5, 127.3, 126.9, 126.5, 126.3, 125.4, 125.0, 122.9, 120.6, 120.3, 120.1, 58.3; HR-MS: calcd ( $M + Na^+$ ) for  $C_{23}H_{18}N_2O_5S$ , 457.0834; found 457.0832; elemental analysis for  $C_{23}H_{18}N_2O_5S$ : calcd C 63.58, H 4.18, N 6.45; found C 63.78, H 4.27, N 6.33; HPLC (Chiralpak AS-H, *i*-PrOH/hexane = 30/70, flow rate = 0.6 mL/min,  $\lambda$  = 210 nm):  $t_{\text{minor}}$  = 26.38 min,  $t_{\text{major}}$  = 47.13 min, ee = 85%.

***N*-(1-(1-Hydroxynaphthalen-2-yl)-2-methylpropyl)-4-methylbenzenesulfonamide (Table 2, entry 18)**

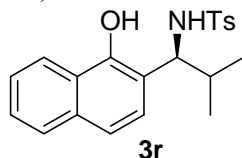

According to the general procedure, the title compound was synthesized in 55% yield.  $^1H$  NMR (300 MHz, acetone- $d_6$ ):  $\delta$  8.20 (s, 1H), 8.13 (d,  $J$  = 8.1 Hz, 1H), 7.72 (d,  $J$  = 7.5 Hz, 1H), 7.47-7.38 (m, 4H), 7.21 (m, 2H), 6.79 (d,  $J$  = 7.8 Hz, 2H), 6.71 (d,  $J$  = 9.6 Hz, 1H), 4.67 (t,  $J$  = 9.3 Hz, 1H), 2.11 (m, 1H), 1.96 (s, 3H), 1.06 (d,  $J$  = 6.6 Hz, 3H), 0.76 (d,  $J$  = 6.9 Hz, 3H);  $^{13}C$  NMR (75 MHz, acetone- $d_6$ ):  $\delta$  149.5, 142.7, 139.4, 134.5, 129.3, 128.3, 127.3, 126.4, 126.3, 125.9, 125.7, 122.8, 122.0, 120.7, 59.7, 34.3, 20.9, 19.9, 19.8; HR-MS: calcd ( $M + Na^+$ ) for  $C_{21}H_{23}NO_3S$ , 392.1296; found 392.1291; HPLC (Chiralpak AS-H, *i*-PrOH/hexane = 40/60, flow rate = 0.6 mL/min,  $\lambda$  = 254 nm):  $t_{\text{minor}}$  = 14.59 min,  $t_{\text{major}}$  = 18.29 min, ee = 85%.

***N*-((4-Chlorophenyl)(2-hydroxynaphthalen-1-yl)methyl)-4-methylbenzenesulfonamide (4)**

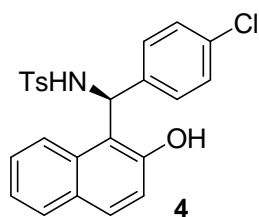

According to the general procedure, the title compound was synthesized in 92% yield.  $^1\text{H}$  NMR (500 MHz,  $\text{CDCl}_3$ ):  $\delta$  7.67-7.63 (m, 2H), 7.50 (d,  $J$  = 9.0 Hz, 1H), 7.38 (t,  $J$  = 7.5 Hz, 1H), 7.31-7.25 (m, 3H), 7.22 (d,  $J$  = 8.5 Hz, 2H), 7.14 (d,  $J$  = 8.5 Hz, 2H), 6.89-6.81 (m, 3H), 6.60 (d,  $J$  = 8.0 Hz, 2H), 6.32 (d,  $J$  = 10.5 Hz, 1H), 2.06 (s, 3H);  $^{13}\text{C}$  NMR (125 MHz,  $\text{CDCl}_3$ ):  $\delta$  150.9, 142.9, 138.7, 136.0, 133.1, 132.2, 129.9, 128.9, 128.7, 128.4, 128.3, 128.2, 127.3, 126.5, 123.5, 121.7, 117.9, 117.2, 53.8, 21.2; HR-MS: calcd ( $\text{M} + \text{Na}^+$ ) for  $\text{C}_{25}\text{H}_{24}\text{ClNO}_3\text{S}$ , 476.1063; found 476.1066; elemental analysis for  $\text{C}_{25}\text{H}_{24}\text{ClNO}_3\text{S}$ : calcd C 66.14, H 5.53, N 3.09; found C 66.02, H 5.37, N 3.17; HPLC (Chiralpak AS-H, *i*-PrOH/hexane = 40/60, flow rate = 0.6 mL/min,  $\lambda$  = 254 nm):  $t_{\text{minor}}$  = 10.09 min,  $t_{\text{major}}$  = 14.75 min, ee = 62%.

### General procedure for the derivation of the Friedel-Crafts products.

At 0 °C, to a vial containing the product (0.06 mmol) and 1.1 mL of anhydrous  $\text{CH}_2\text{Cl}_2$  was added 2,6-lutidine (17.5  $\mu\text{L}$ , 0.15 mmol) and TESOTf (16.4  $\mu\text{L}$ , 0.072 mmol). The reaction solution was stirred at 0 °C for 0.5 h before 0.1 mL of methanol and 3 mL of brine was added. The mixture was extracted with  $\text{CH}_2\text{Cl}_2$ . The combined extracts were dried over  $\text{MgSO}_4$ , filtered and concentrated in vacuo. The resulting residue was then purified by silica gel chromatography, eluting with EtOAc/hexane (1/7) to provide the corresponding derivative.

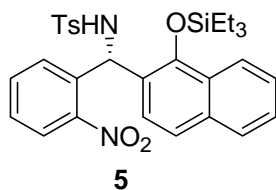

The title compound was obtained in 92% yield.  $^1\text{H}$  NMR (500 MHz,  $\text{CD}_3\text{Cl}$ ):  $\delta$  7.96-7.94 (m, 1H), 7.77-7.70 (m, 2H), 7.48-7.43 (m, 4H), 7.37-7.26 (m, 4H), 7.05 (d,  $J$  = 8.5 Hz, 1H), 6.94 (d,  $J$  = 8.0 Hz, 2H), 6.72 (d,  $J$  = 7.5 Hz, 1H), 5.48 (d,  $J$  = 7.5 Hz, 1H), 2.21 (s, 3H), 0.90 (t,  $J$  = 7.5 Hz, 9H), 0.81-0.79 (m, 6H);  $^{13}\text{C}$  NMR (125 MHz,  $\text{CD}_3\text{Cl}$ ):  $\delta$  149.8, 149.4, 143.0, 137.5, 134.5, 134.2, 132.1, 131.1, 129.0, 128.6, 127.8, 127.7, 127.1, 126.4, 125.3, 124.7, 122.9, 122.6, 121.5, 53.4, 21.3, 6.8, 5.7; HR-MS: calcd ( $\text{M} + \text{Na}^+$ ) for  $\text{C}_{30}\text{H}_{34}\text{N}_2\text{O}_5\text{SSi}$ , 585.1855; found 585.1859; HPLC (Chiralpak OD-H, *i*-PrOH/hexane = 5/95, flow rate = 0.6 mL/min,  $\lambda$  = 254 nm):  $t_{\text{minor}}$  = 32.99 min,  $t_{\text{major}}$  = 20.39 min, ee = 91%;  $[\alpha]_{\text{D}}^{22}$  = -76.4 ( $c$  = 1.0 in  $\text{CH}_2\text{Cl}_2$ ).

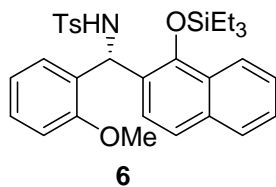

The title compound was obtained in 90% yield.  $^1\text{H}$  NMR (500 MHz,  $\text{CD}_3\text{Cl}$ ):  $\delta$  7.99-7.97 (m, 1H), 7.76-7.74 (m, 1H), 7.67 (t,  $J$  = 8.0 Hz, 3H), 7.43-7.39 (m, 3H), 7.15-7.14 (m, 1H), 7.05 (d,  $J$  = 8.0 Hz, 2H), 6.89 (d,  $J$  = 6.5 Hz, 1H), 6.75-6.68 (m, 2H), 6.23 (d,  $J$  = 6.0 Hz, 1H), 5.33 (d,  $J$  = 5.5 Hz, 1H), 3.67 (s, 3H), 2.30 (s, 3H), 0.97-0.89 (m, 9H), 0.73-0.72 (m, 6H);  $^{13}\text{C}$  NMR (125 MHz,  $\text{CD}_3\text{Cl}$ ):  $\delta$  156.7, 148.9, 142.7, 137.4, 134.2, 129.6, 129.1, 128.9, 127.9, 127.8, 127.6, 127.5, 126.4, 125.8, 124.9, 124.6, 122.9, 121.0, 120.3, 110.5, 54.9, 52.5, 21.3, 6.7, 5.5; HR-MS: calcd ( $\text{M} + \text{Na}^+$ ) for  $\text{C}_{31}\text{H}_{37}\text{NO}_4\text{SSi}$ , 570.2110; found 570.2111; HPLC (Chiralpak OD-H, *i*-PrOH/hexane = 5/95, flow

rate = 0.6 mL/min,  $\lambda$  = 254 nm):  $t_{\text{minor}}$  = 22.95 min,  $t_{\text{major}}$  = 15.58 min, ee = 80%;  $[\alpha]_{\text{D}}^{22}$  = -89.6 ( $c$  = 1.0 in  $\text{CH}_2\text{Cl}_2$ ).

### Procedures for the deprotection of sulfonamide group

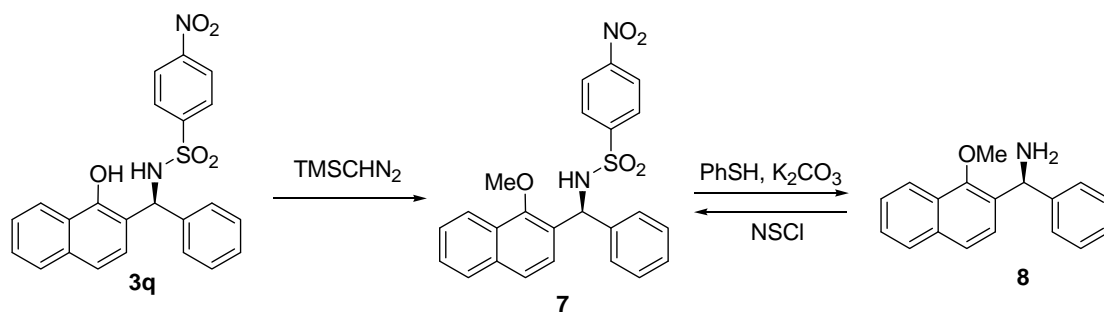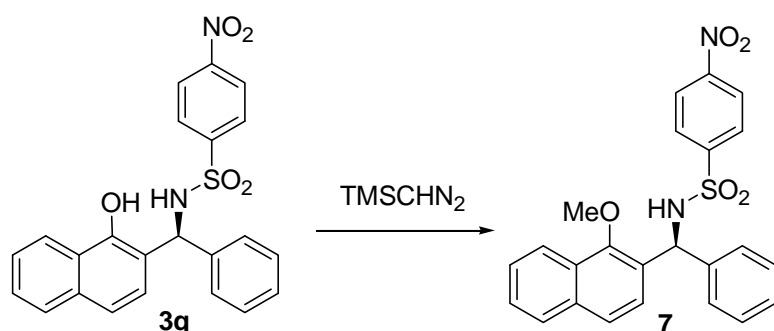

#### (*S*)-*N*-((1-Methoxynaphthalen-2-yl)(phenyl)methyl)-4-nitrobenzenesulfonamide (**7**)

To a solution of compound **3q** (43.5 mg, 0.1 mmol) in MeOH (2 mL) and  $\text{CH}_2\text{Cl}_2$  (2 mL),  $\text{TMSCHN}_2$  (2N solution in hexane, 0.5 mL, 1.0 mmol) was added in 5 portions within 30 min at rt. The reaction mixture was then stirred at rt for another 30 min. The solvent was removed under reduced pressure. The residue was purified through chromatography and got the desired product **7** 38 mg, 85% yield.  $^1\text{H}$  NMR (300 MHz,  $\text{CDCl}_3:\text{CD}_3\text{OD}$  = 10:1):  $\delta$  7.81-7.64 (m, 6H), 7.47-7.41 (m, 3H), 7.35-7.11 (m, 5H), 7.12 (d,  $J$  = 8.4 Hz, 1H), 6.27 (d,  $J$  = 9.6 Hz, 1H), 6.04 (d,  $J$  = 9.6 Hz, 1H), 3.52 (s, 3H);  $^{13}\text{C}$  NMR (75 MHz,  $\text{CDCl}_3:\text{CD}_3\text{OD}$  = 10:1):  $\delta$  153.1, 148.9, 145.7, 139.9, 134.6, 128.6, 128.0, 127.9, 127.8, 127.5, 126.9, 126.8, 126.6, 126.1, 124.5, 123.2, 121.7, 62.4, 57.9;

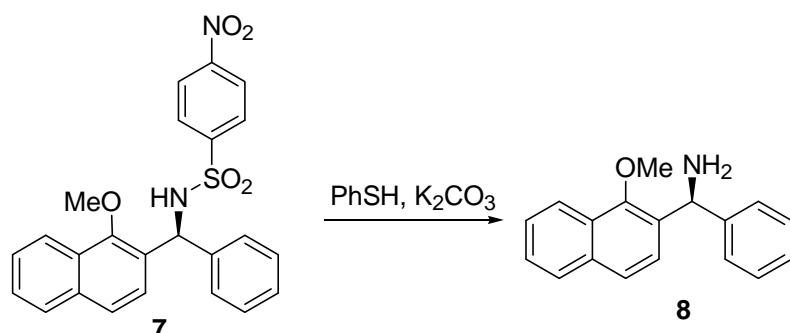

#### (*S*)-((1-Methoxynaphthalen-2-yl)(phenyl)methyl)ethanamine (**8**)

$\text{PhSH}$  (148 mg, 1.34 mmol) was added to a solution of compound **7** (30 mg, 0.067 mmol) and  $\text{K}_2\text{CO}_3$  (185 mg, 1.34 mmol) in DMF (0.5 mL) and  $\text{CH}_3\text{CN}$  (0.5 mL). The mixture was stirred at 50 °C for 30 min. Water (10 mL) was added and extracted with EtOAc (5 mL  $\times$  2). The combined organic layer was back extracted with 0.5 N HCl (3 mL) and then the aqueous layer was basified with NaOH

and extracted with EtOAc. The combined EtOAc layer was dried over Na<sub>2</sub>SO<sub>4</sub> and the solvent was removed. The crude product (13 mg) was pure enough in 74% yield. <sup>1</sup>H NMR (300 MHz, CDCl<sub>3</sub>:CD<sub>3</sub>OD = 10:1): δ 8.00 (d, *J* = 8.1 Hz, 1H), 7.82 (d, *J* = 8.7 Hz, 1H), 7.61 (d, *J* = 8.4 Hz, 1H), 7.54-7.45 (m, 5H), 7.47-7.41 (m, 3H), 7.34-7.15 (m, 3H), 5.84 (s, 1H), 3.89 (s, 3H); <sup>13</sup>C NMR (75 MHz, CDCl<sub>3</sub>:CD<sub>3</sub>OD = 10:1): δ 152.9, 134.3, 128.4, 128.1, 127.8, 126.9, 126.8, 126.0, 125.4, 124.6, 122.3, 62.6, 52.9;

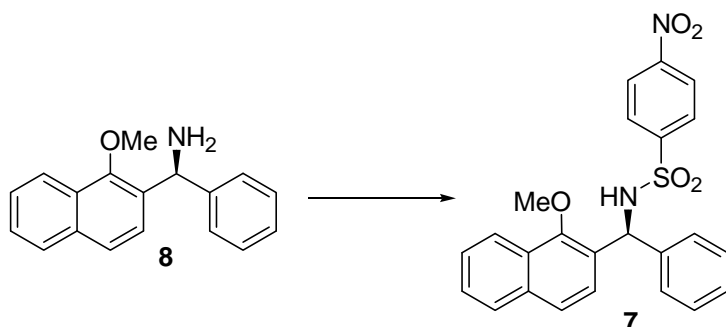

**(S)-N-((1-Methoxynaphthalen-2-yl)(phenyl)methyl)-4-nitrobenzenesulfonamide (7)** (Converted to **7** for chiral HPLC analysis)

*p*-NO<sub>2</sub>C<sub>6</sub>H<sub>4</sub>SO<sub>2</sub>Cl (16.8 mg, 0.076 mmol) was added to a solution of compound **8** (10 mg, 0.038 mmol) and Et<sub>3</sub>N (11.5 mg, 0.11 mmol) in CH<sub>2</sub>Cl<sub>2</sub> (0.4 mL) at 0 °C. The reaction mixture was stirred at the same temperature for 3 h. Direct chromatography gave the desired product 15 mg, 88% yield. HPLC (Chiralpak AS-H, *i*-PrOH/hexane = 30/70, flow rate = 0.6 mL/min, λ = 210 nm): *t*<sub>minor</sub> = 30.06 min, *t*<sub>major</sub> = 39.88 min, ee = 85%.

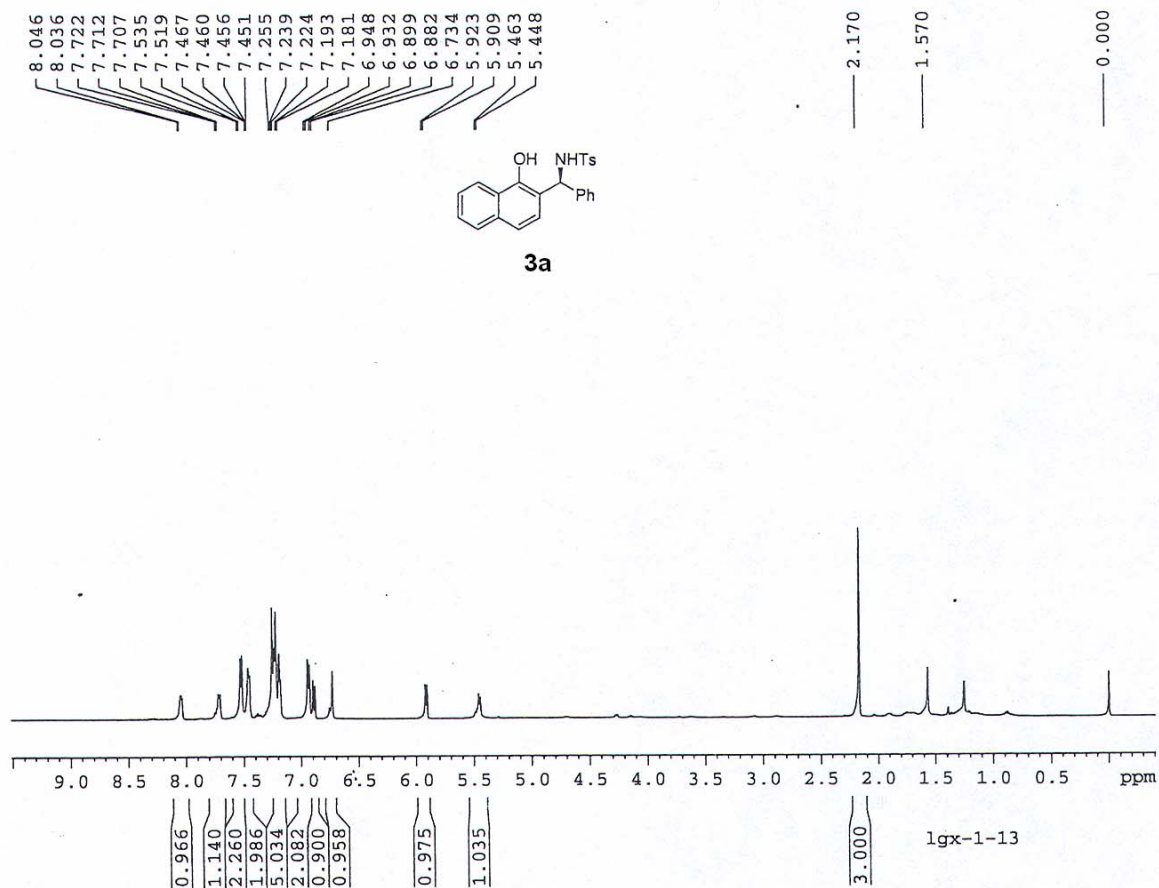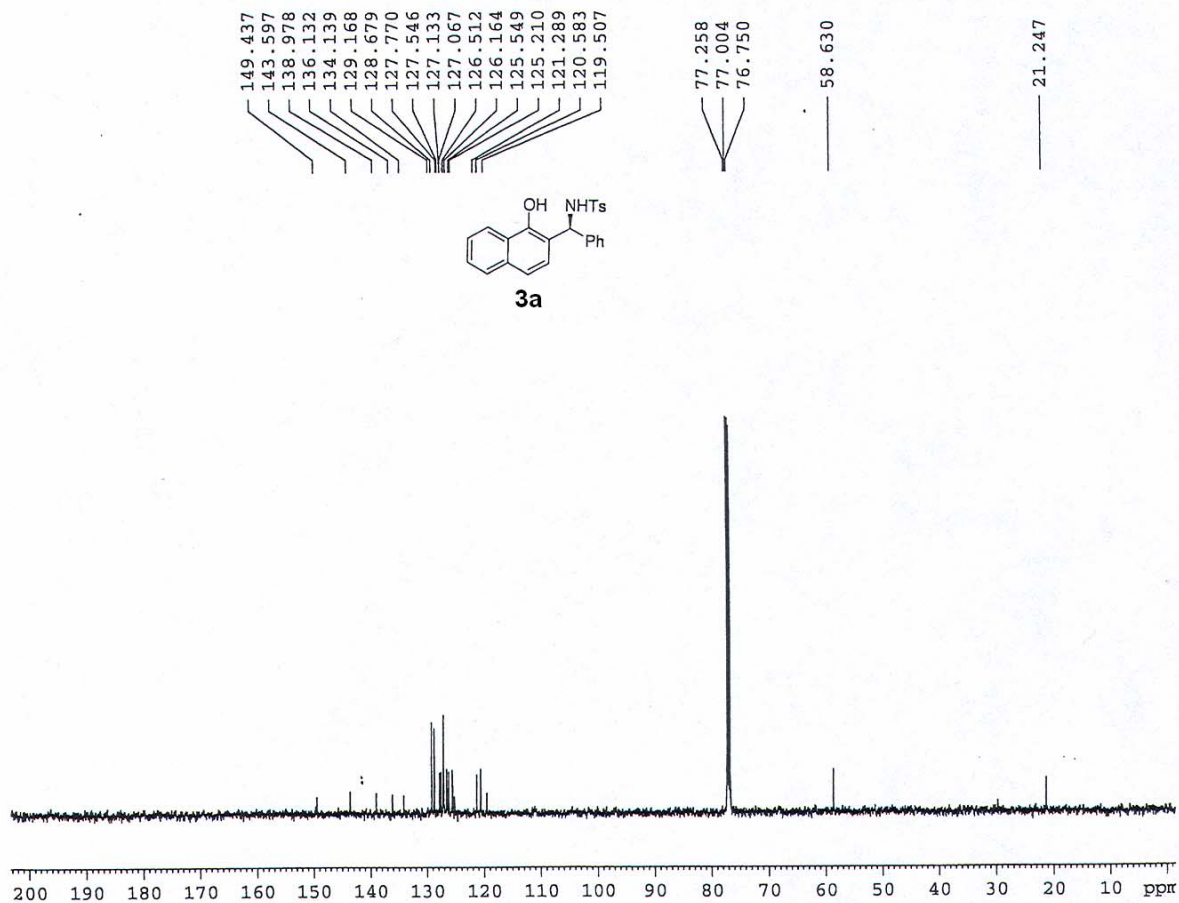



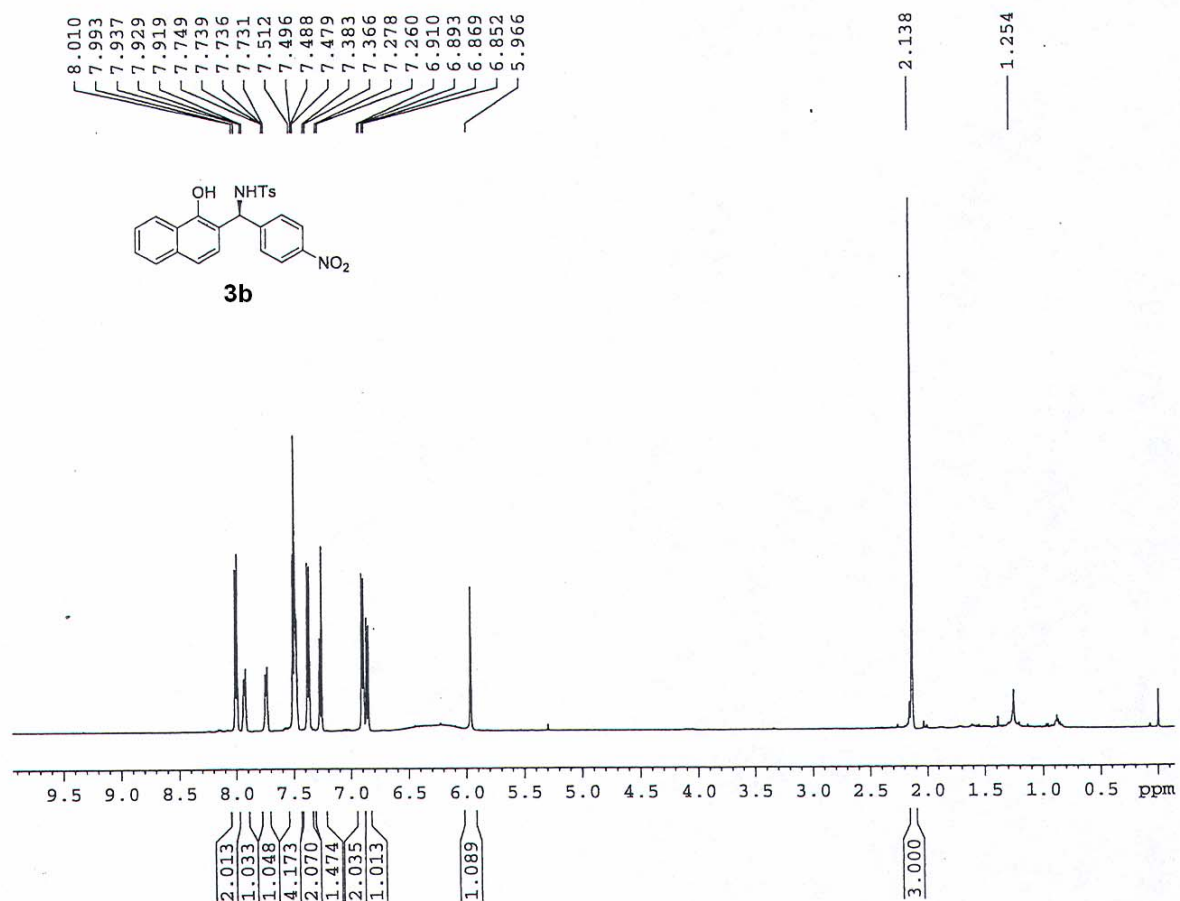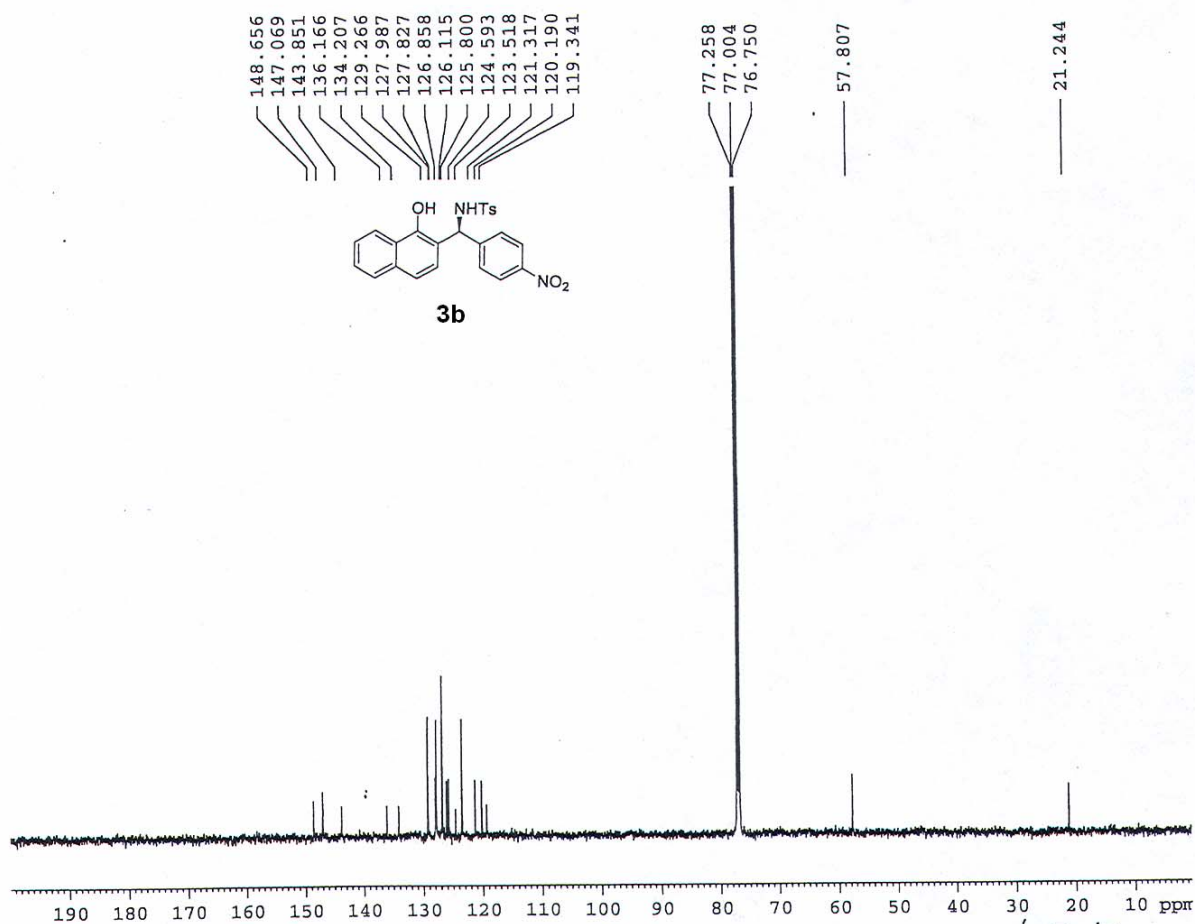

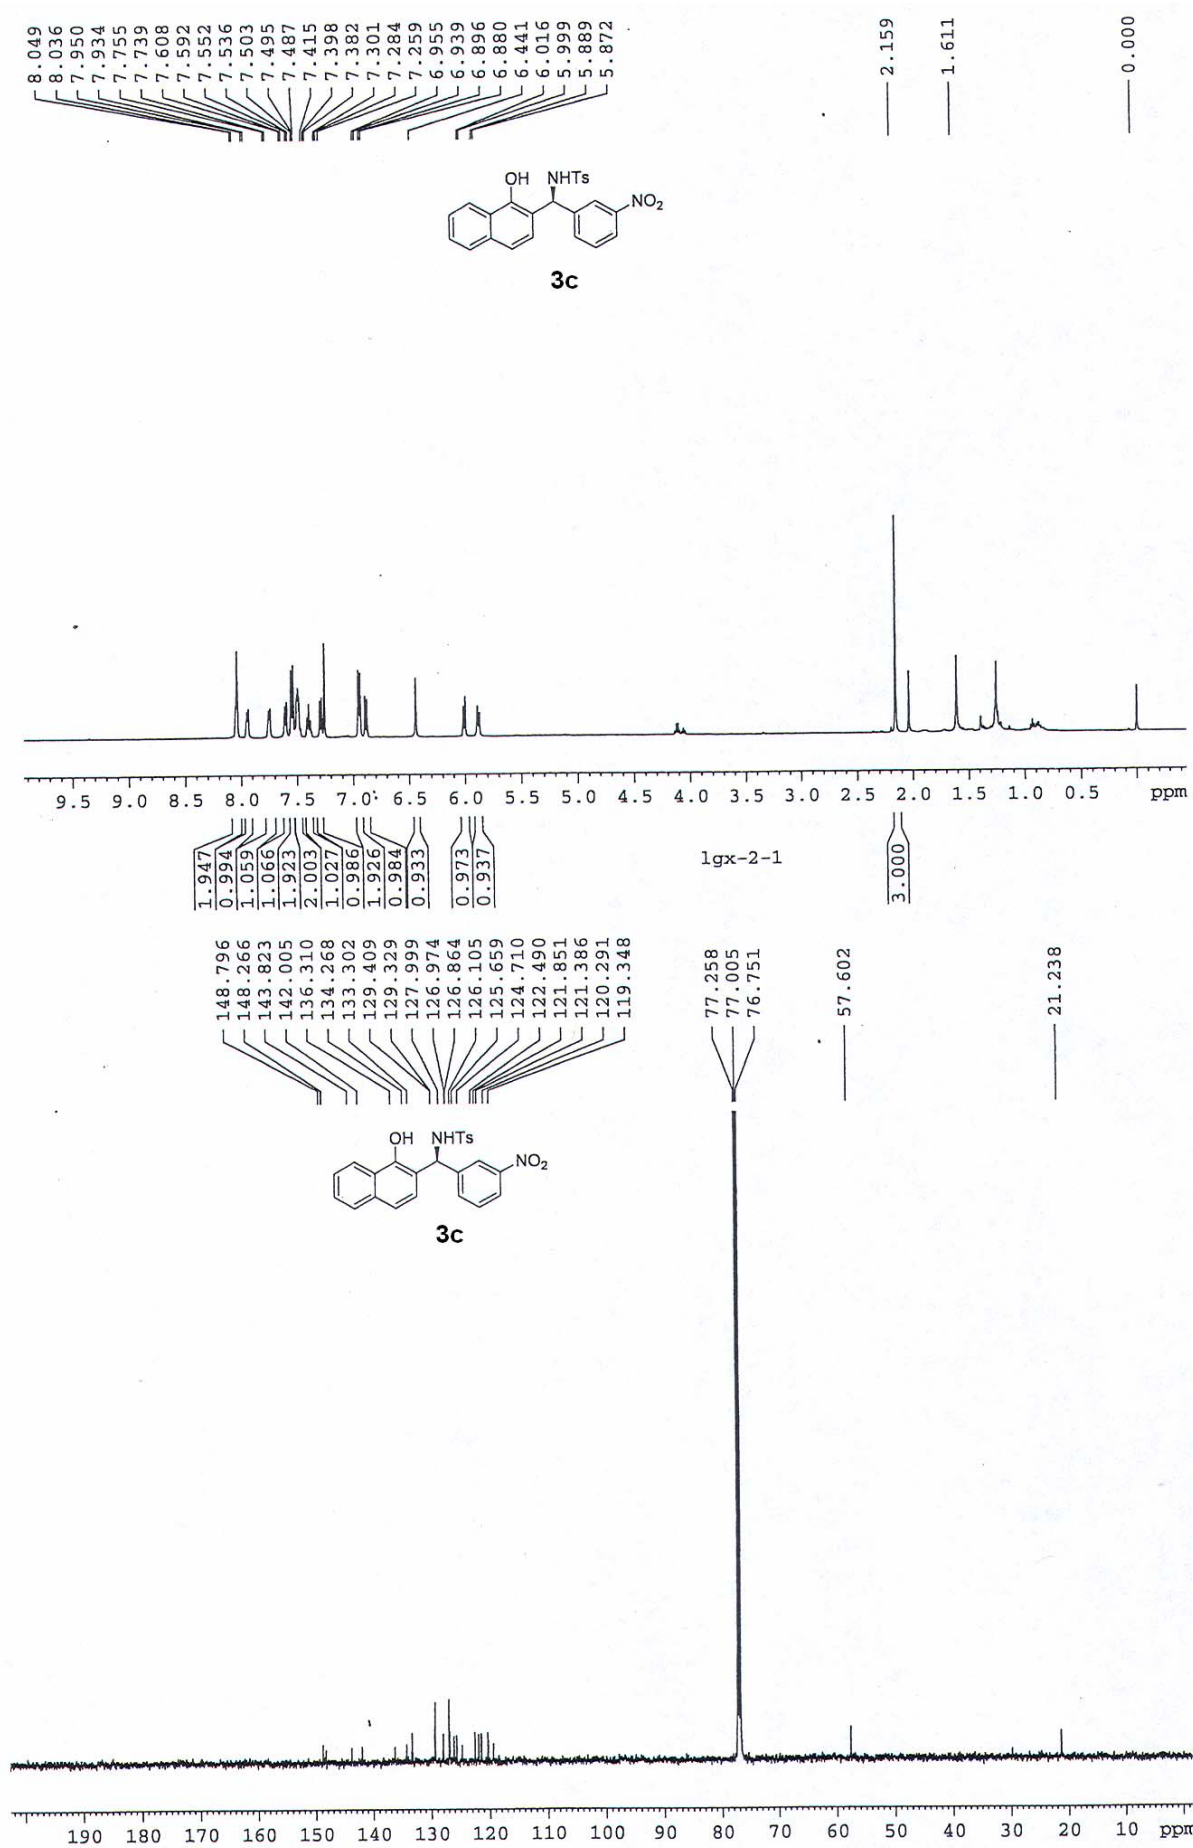

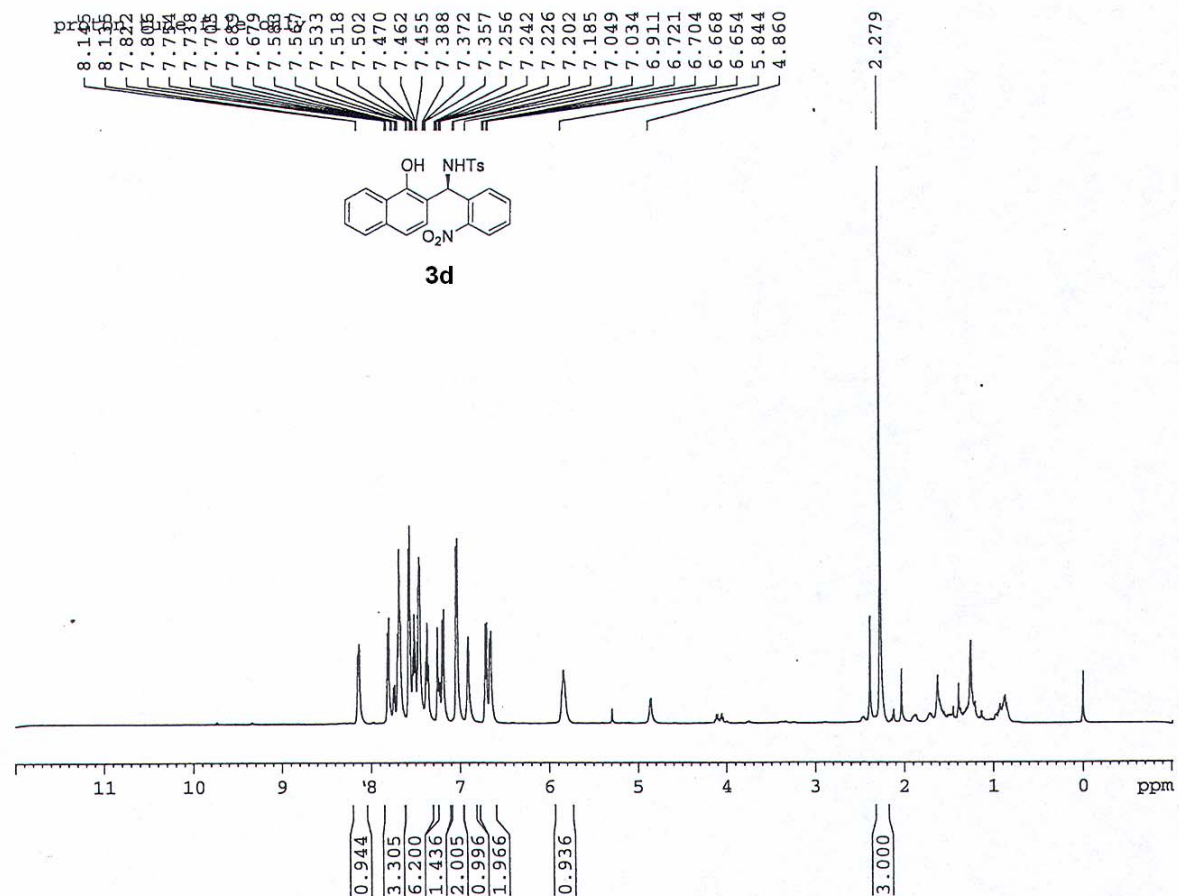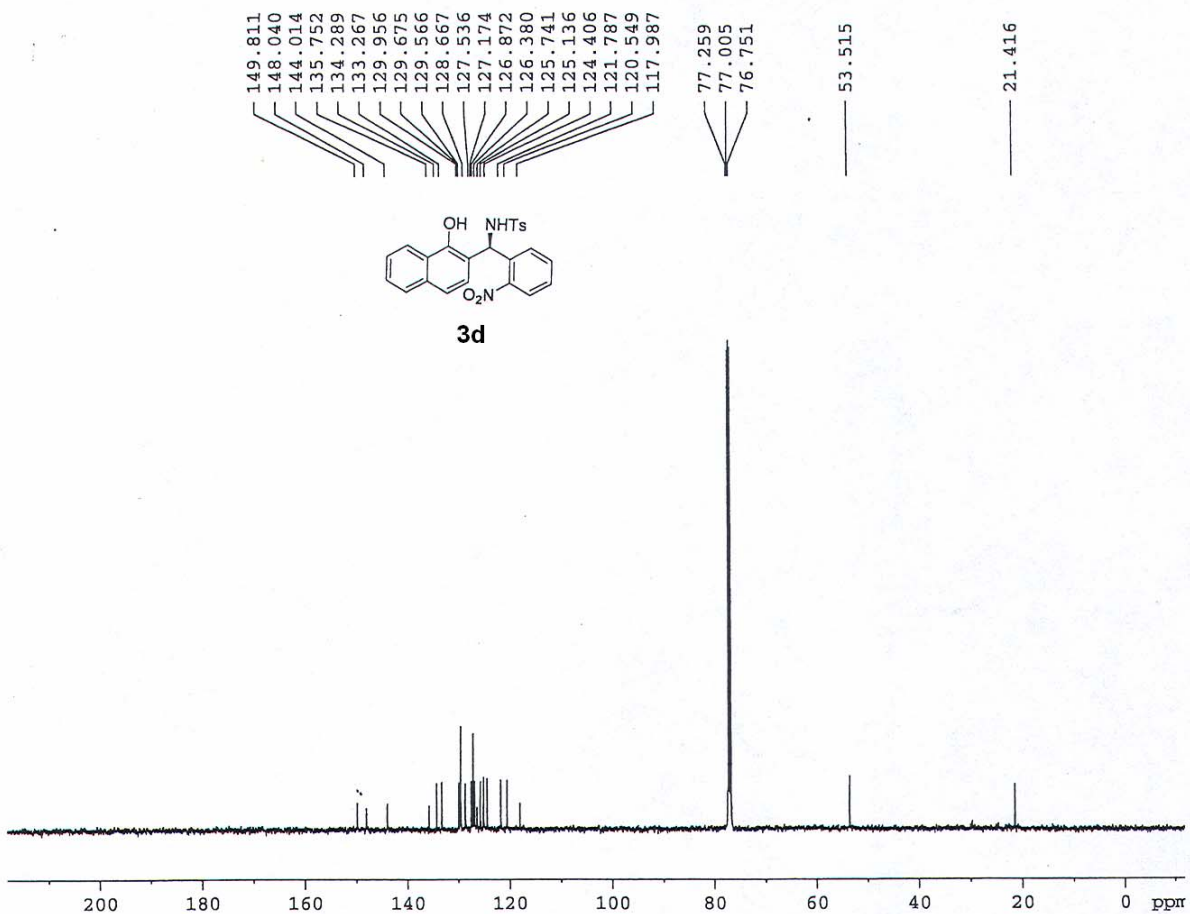

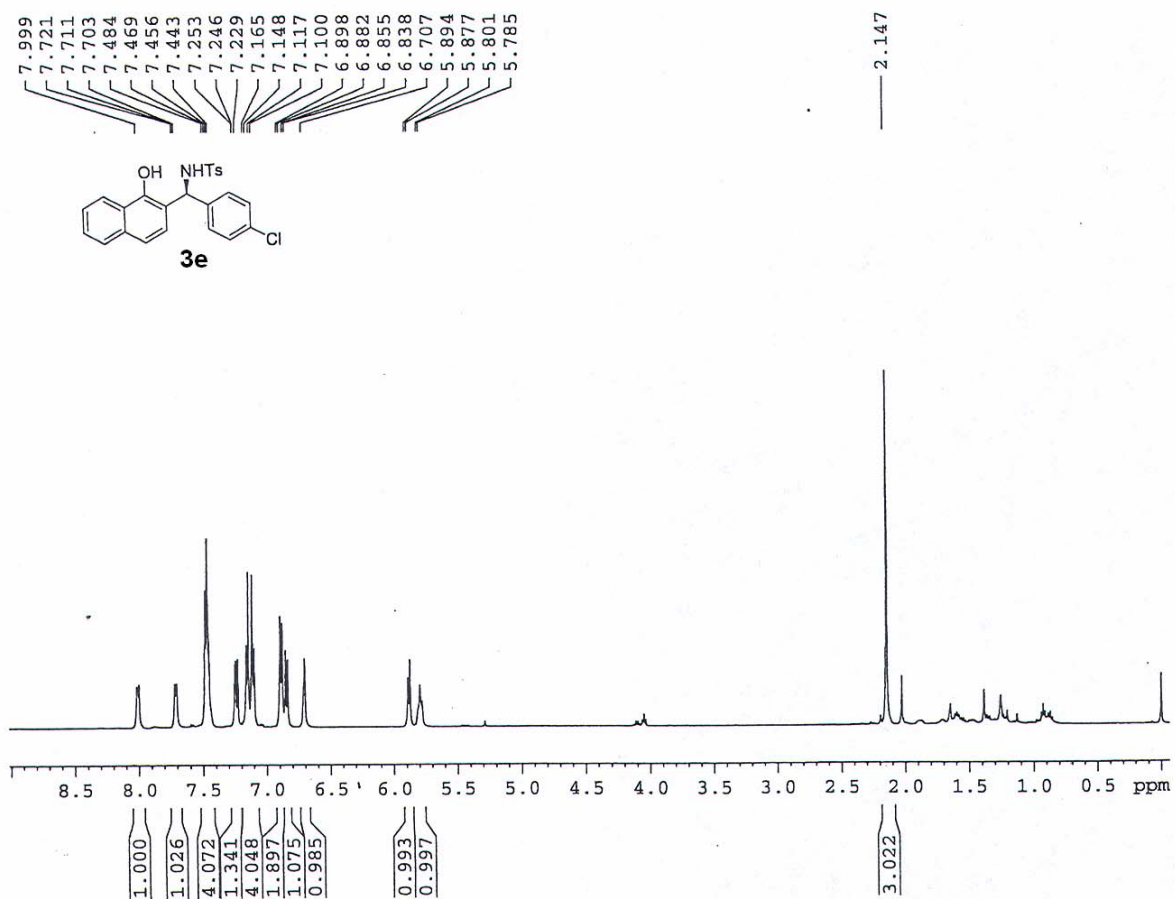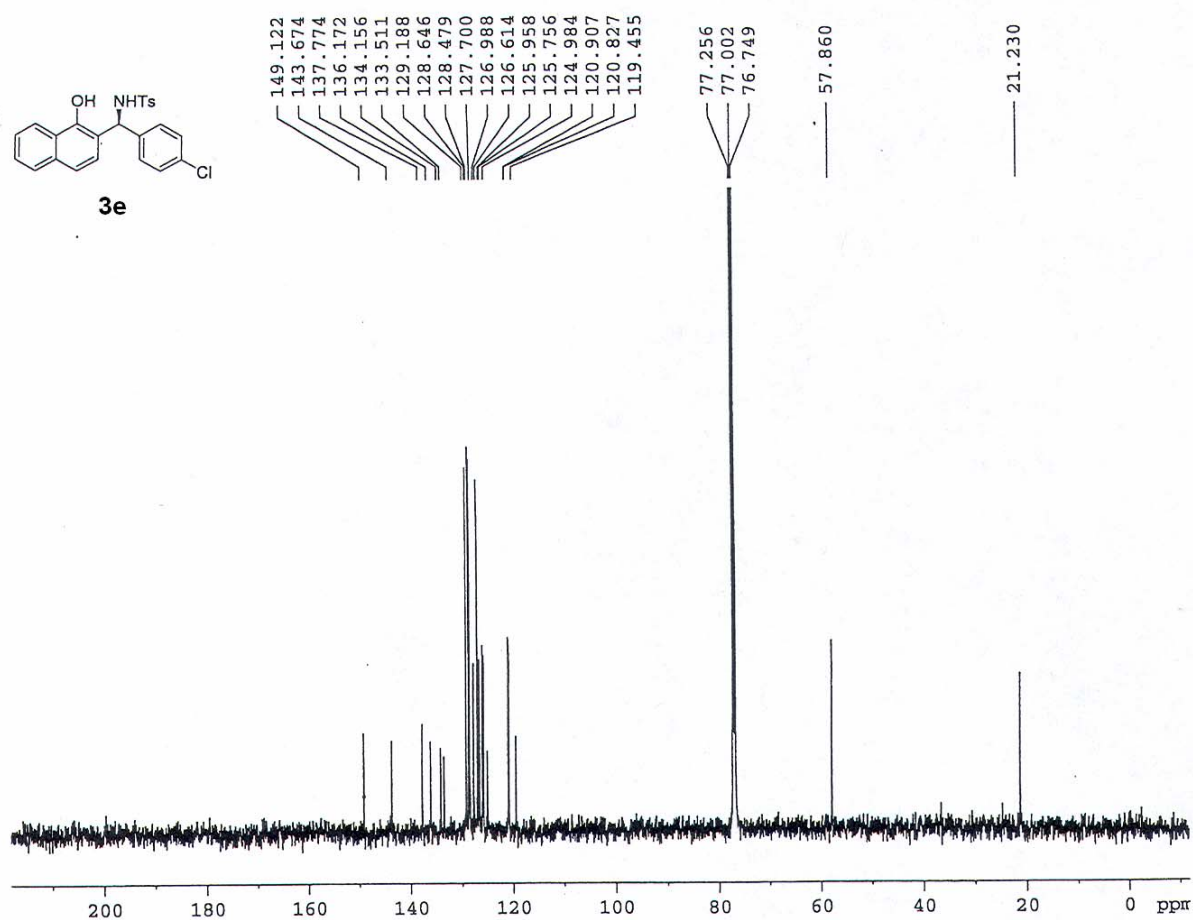

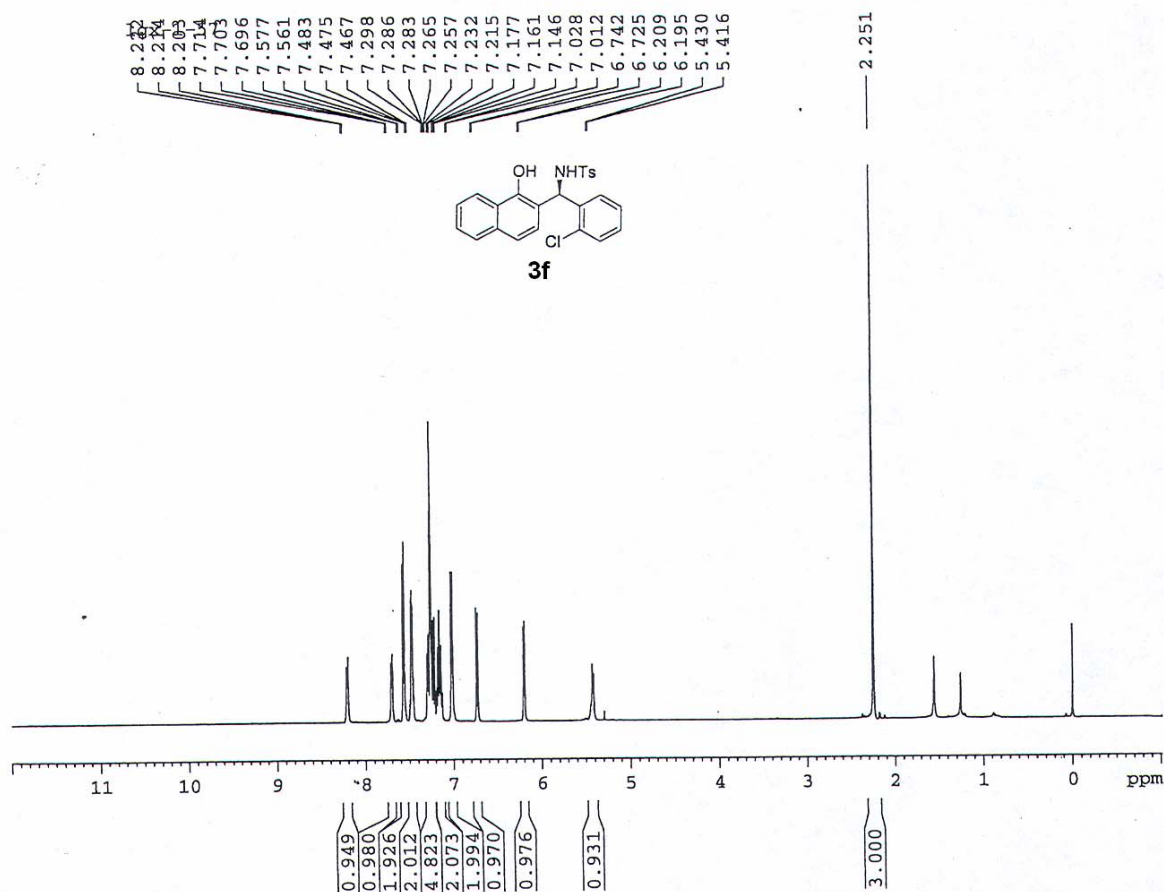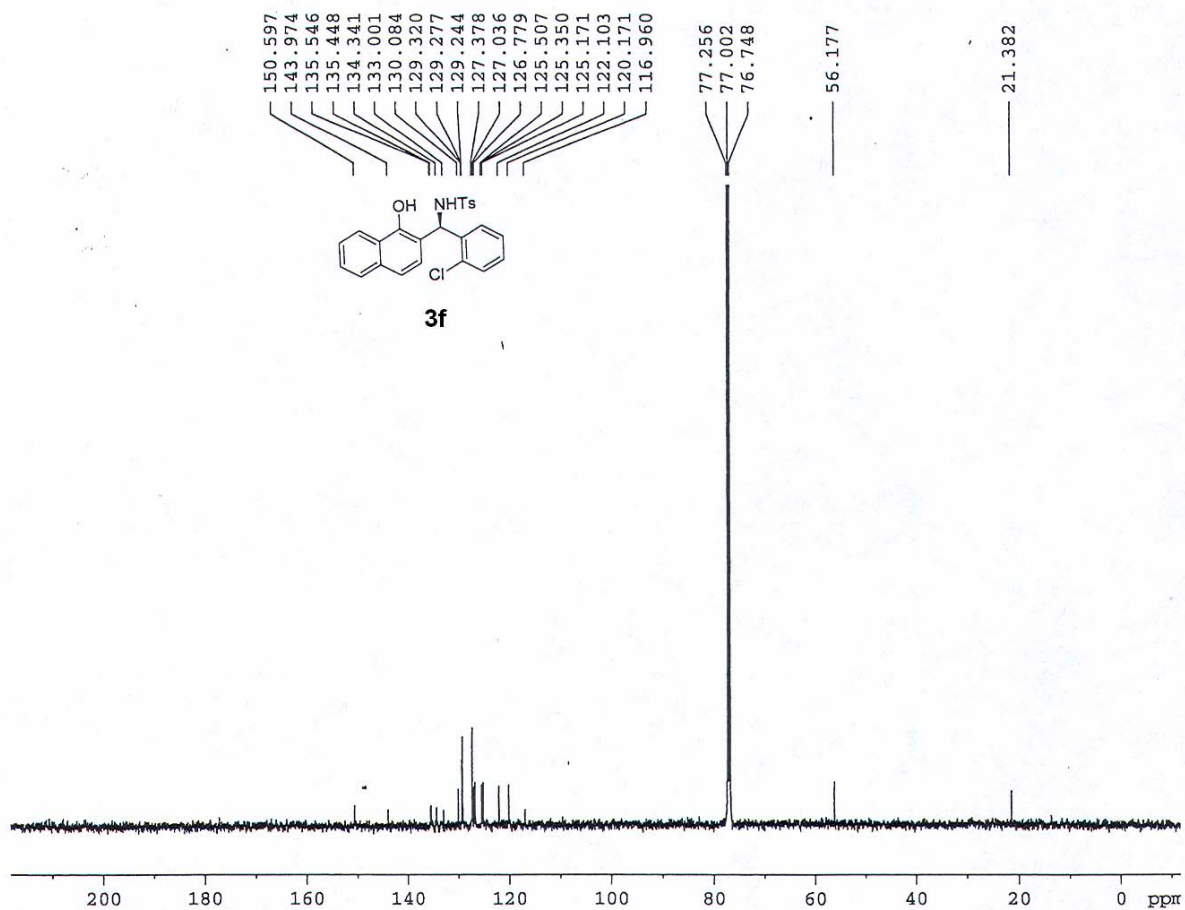



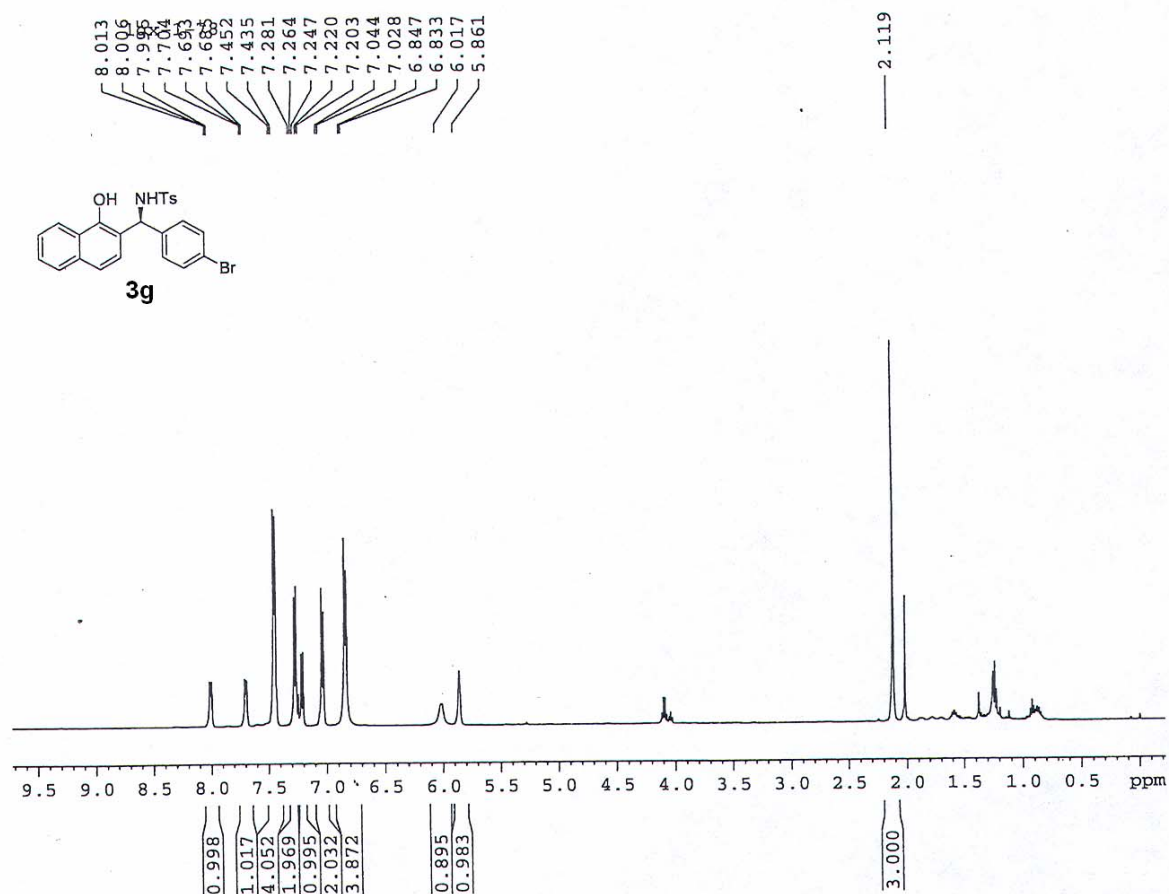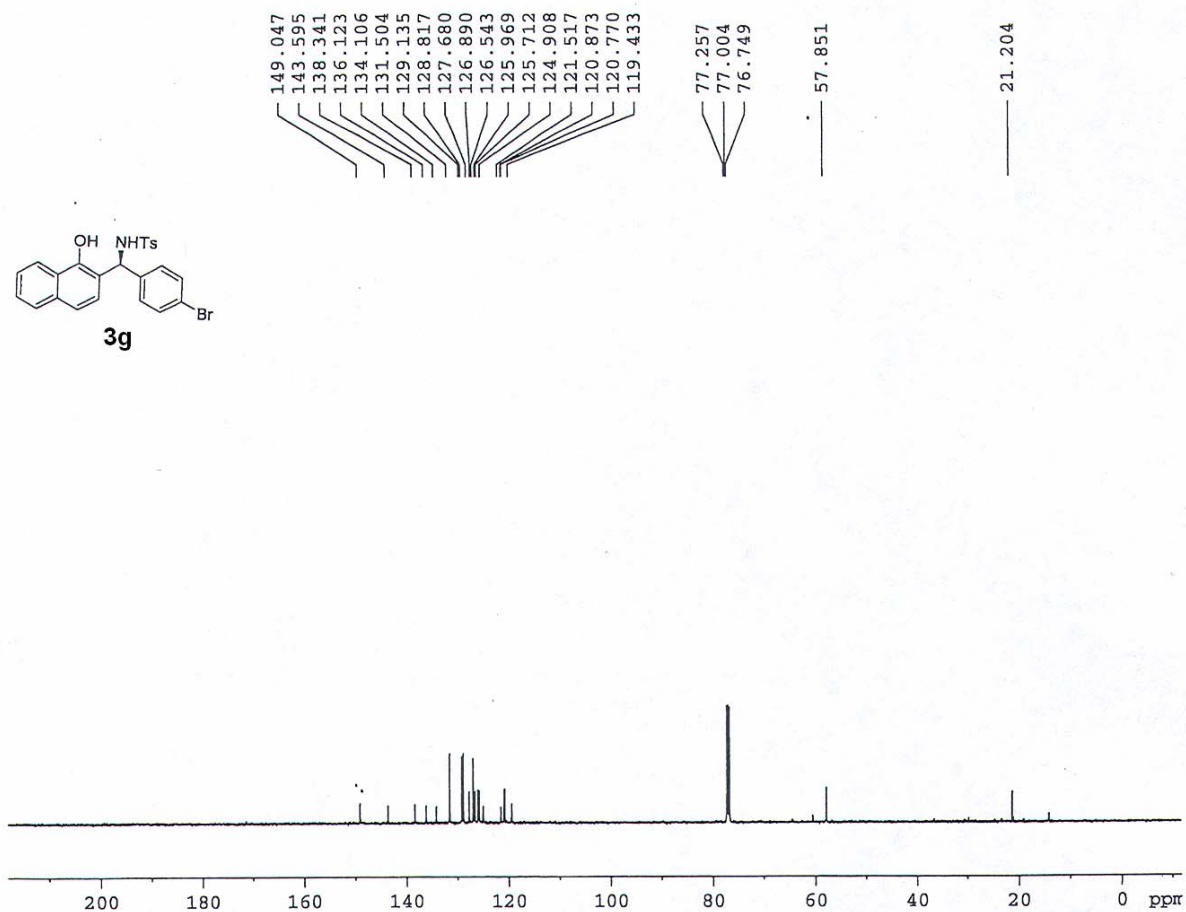

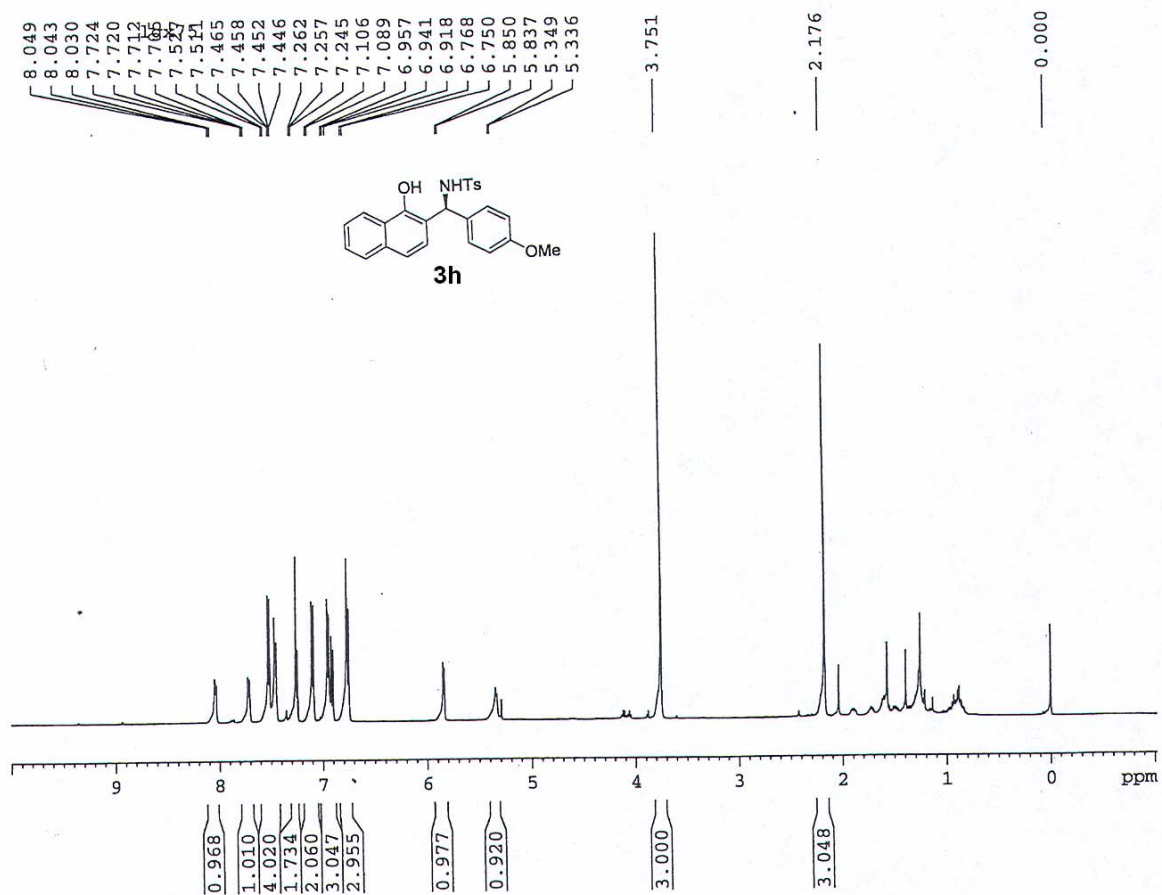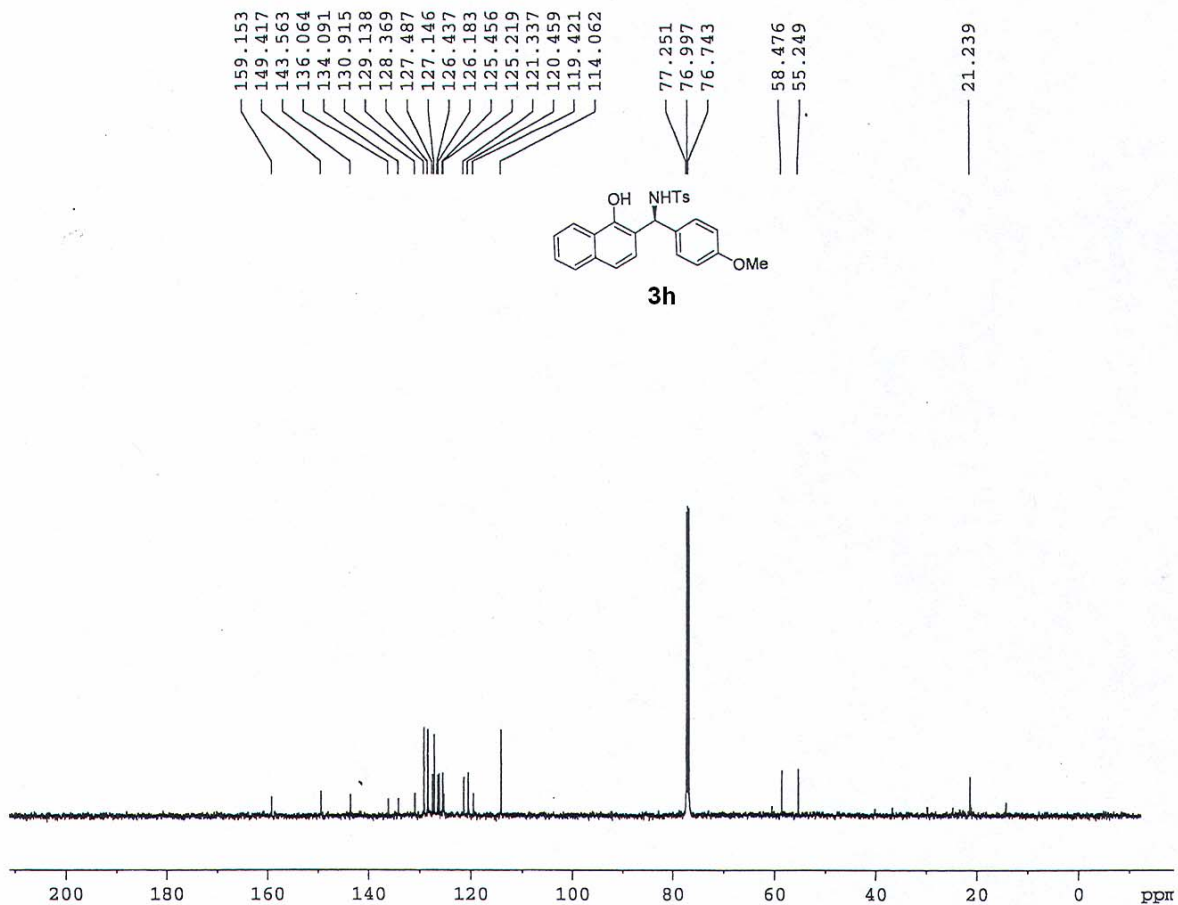

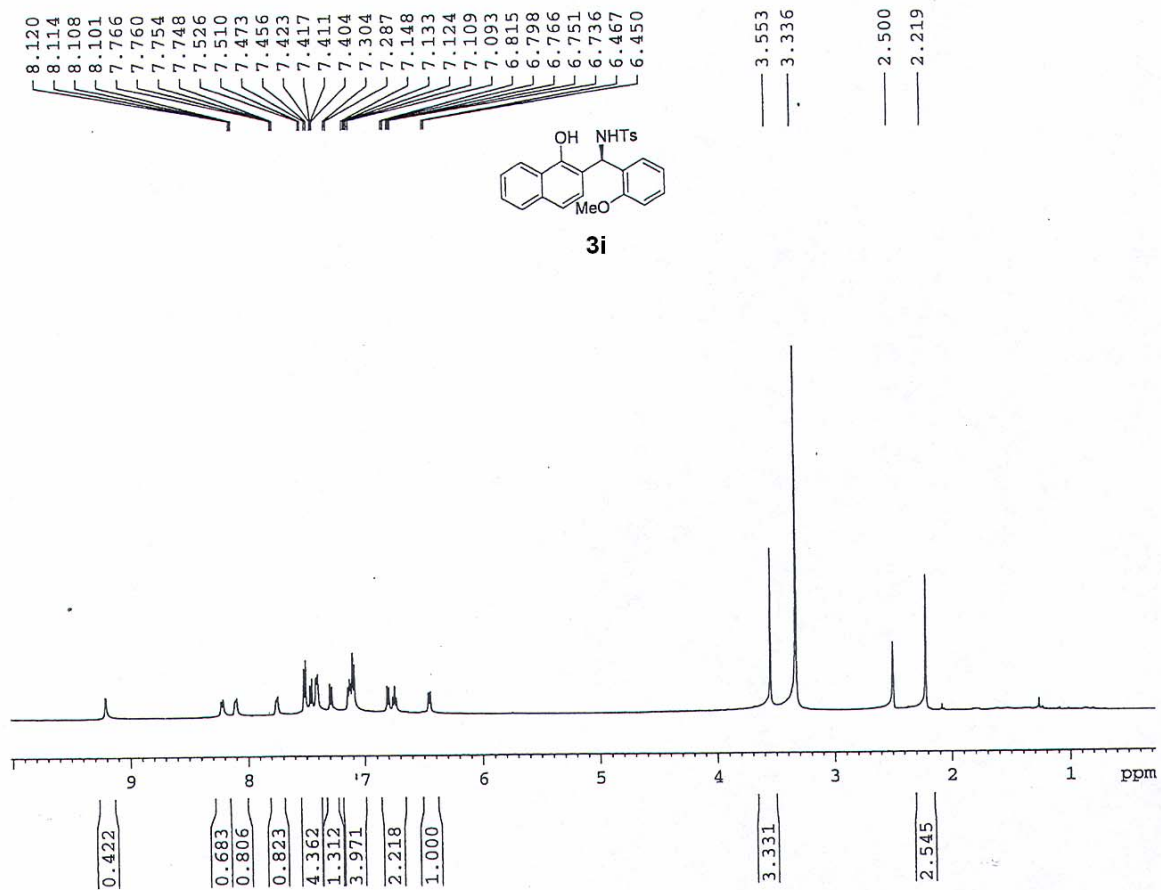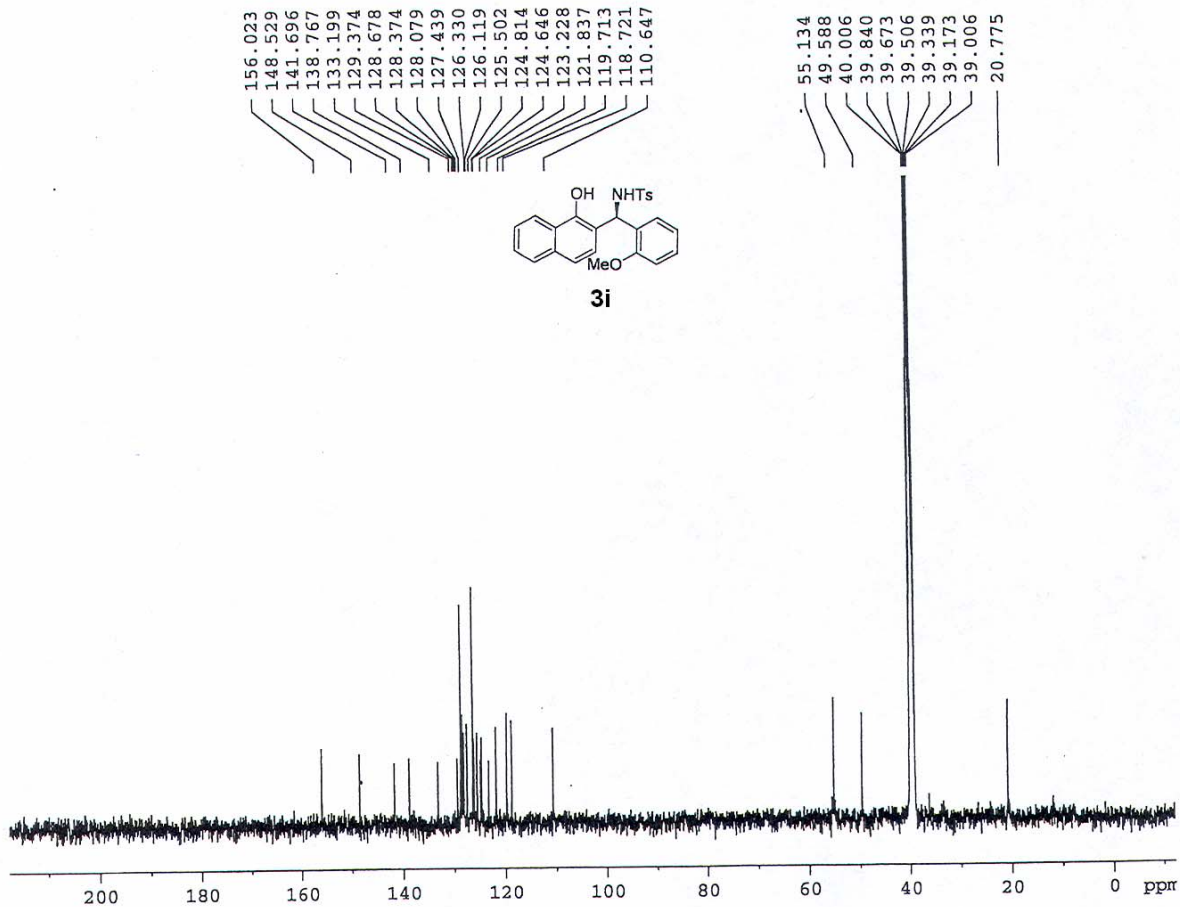



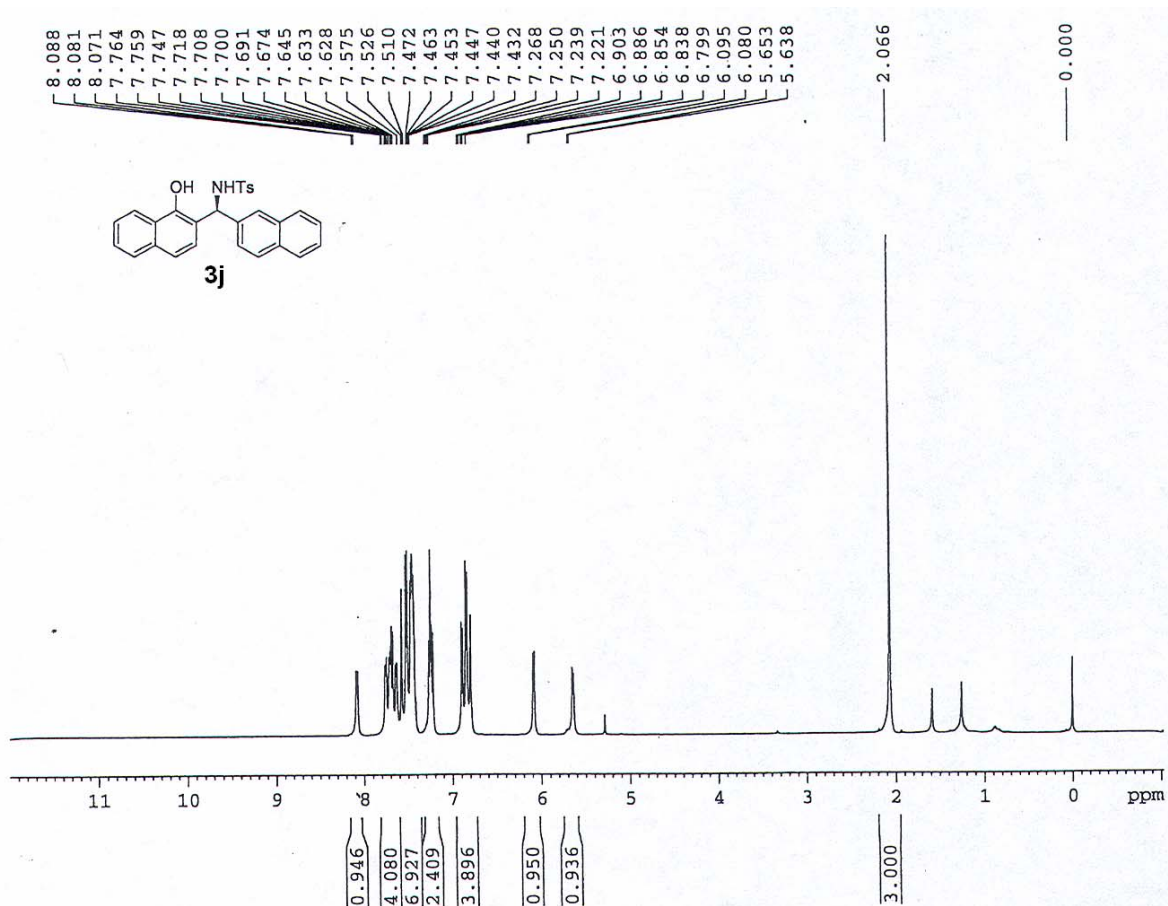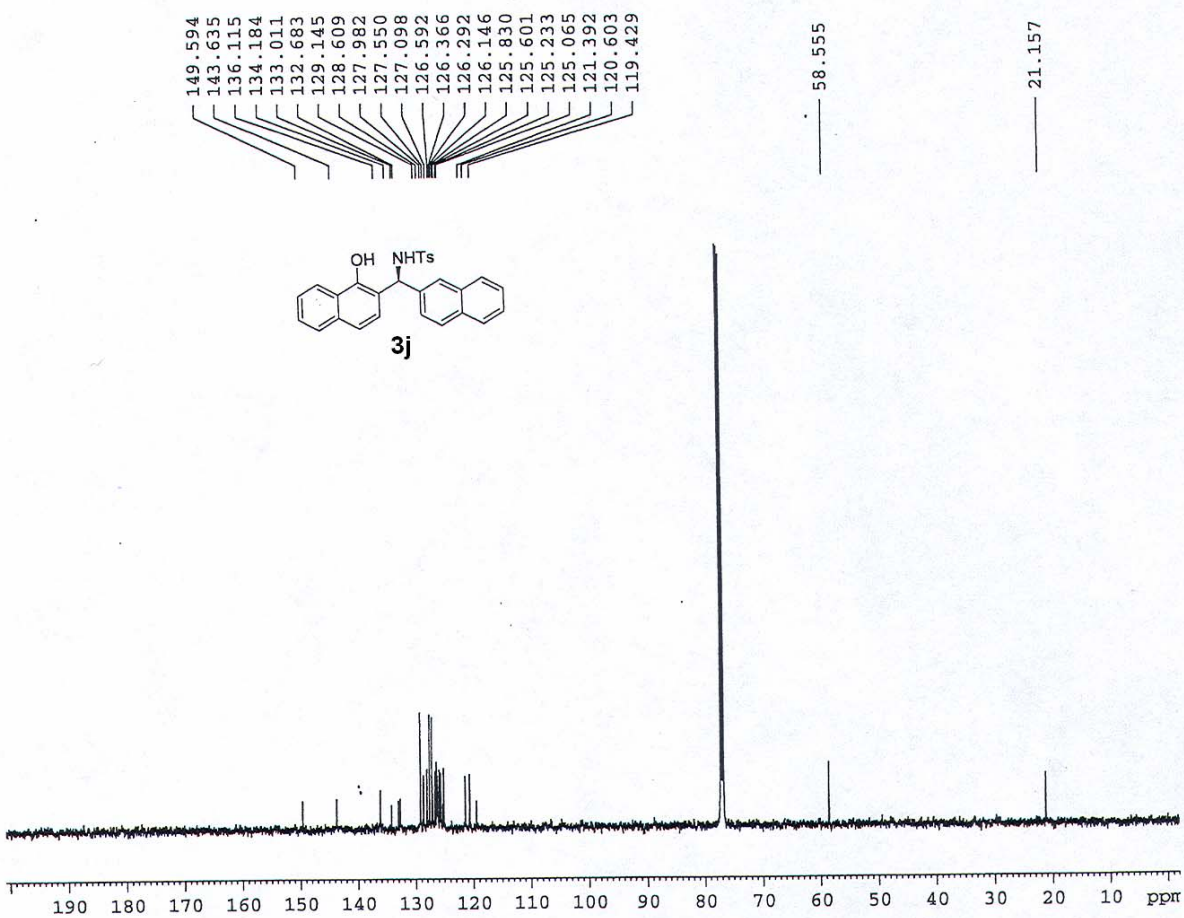

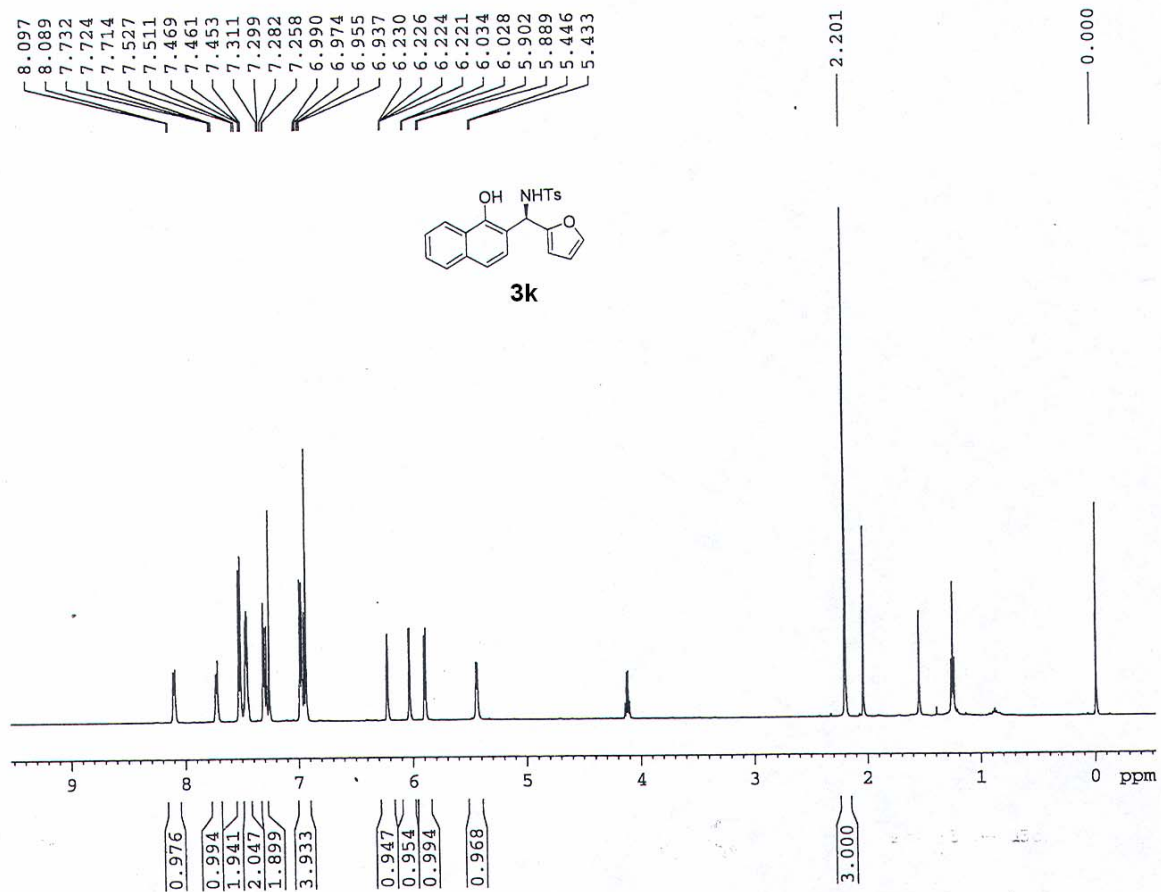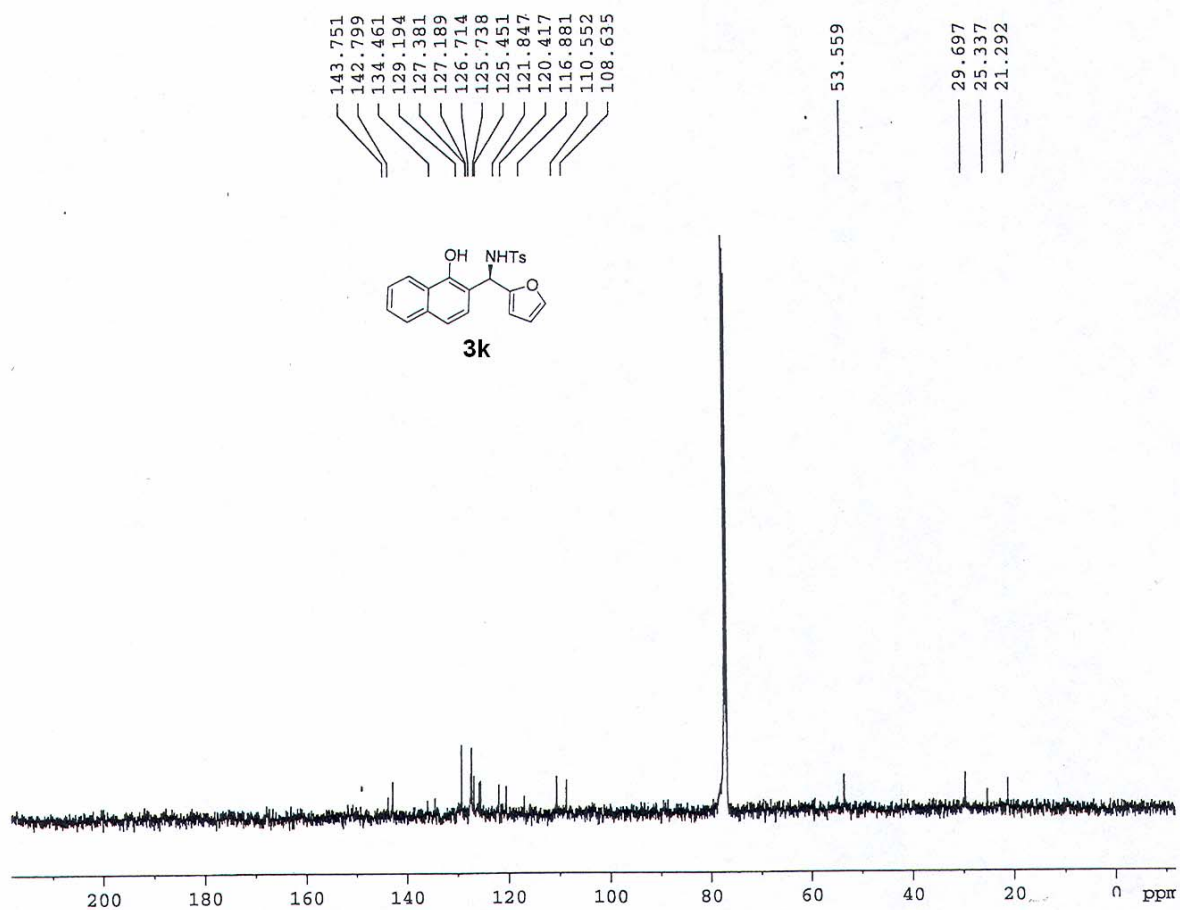

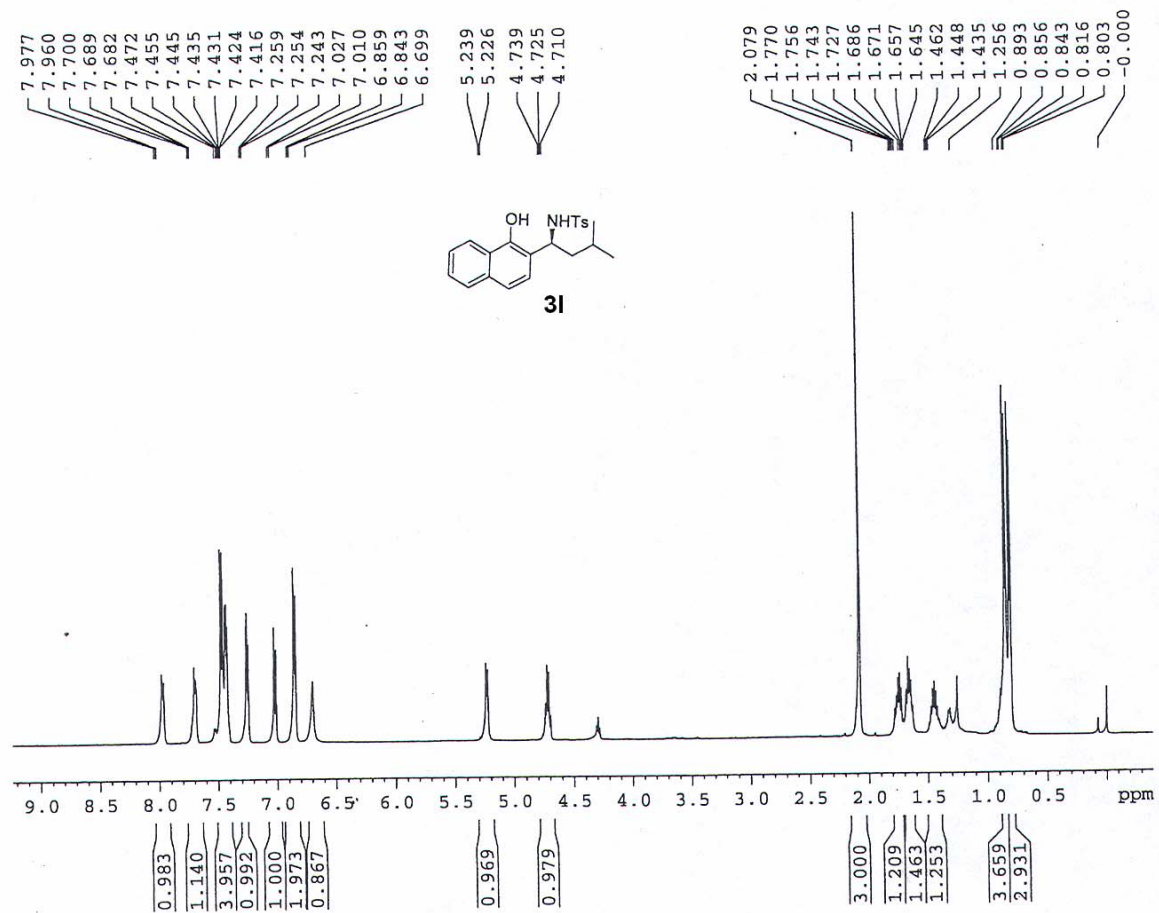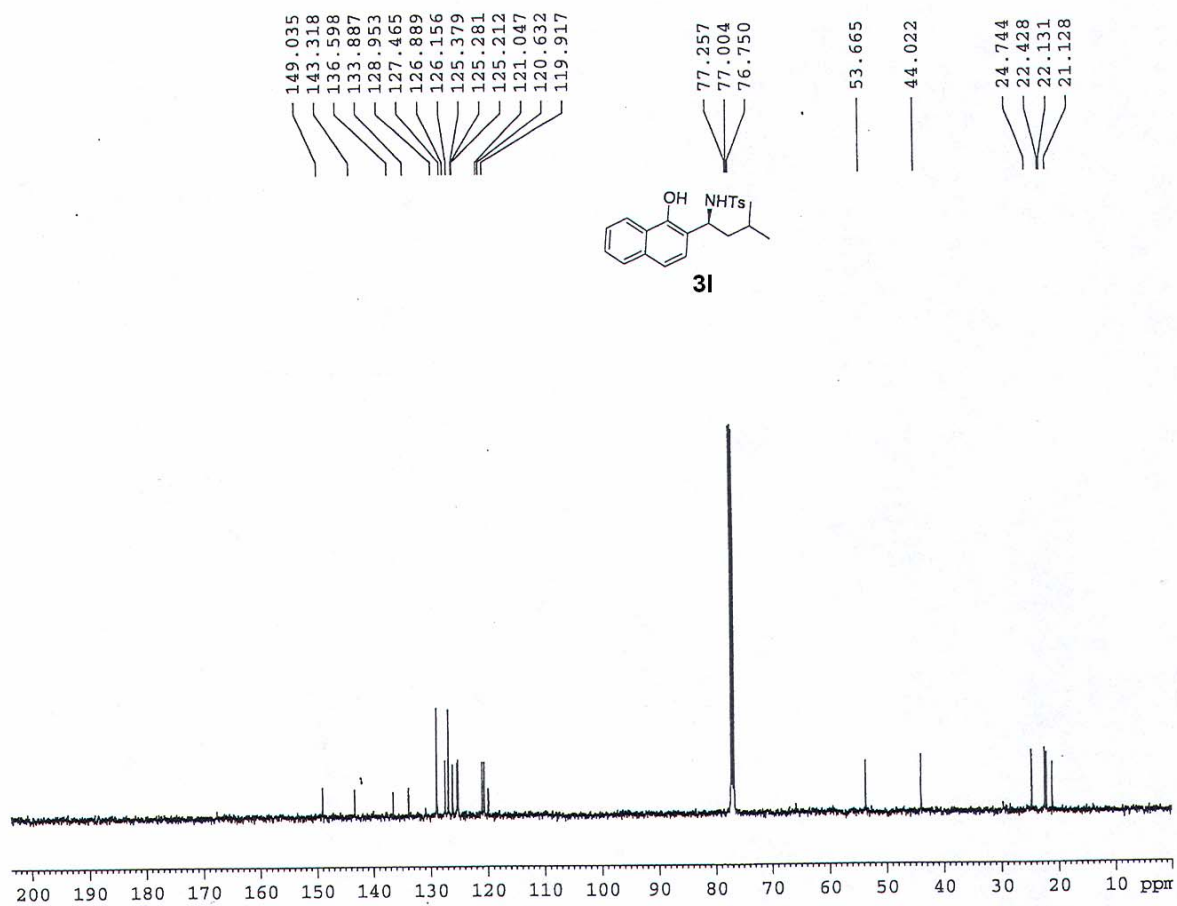

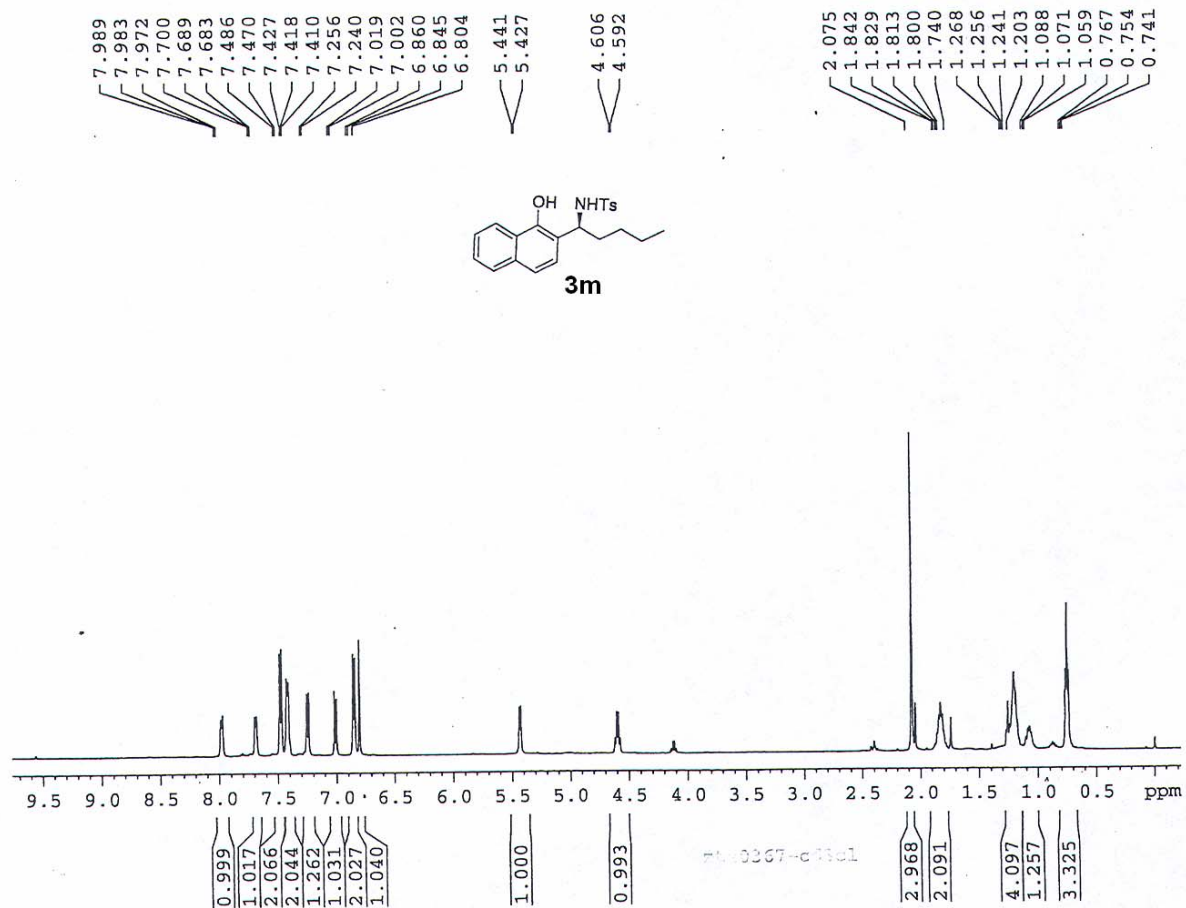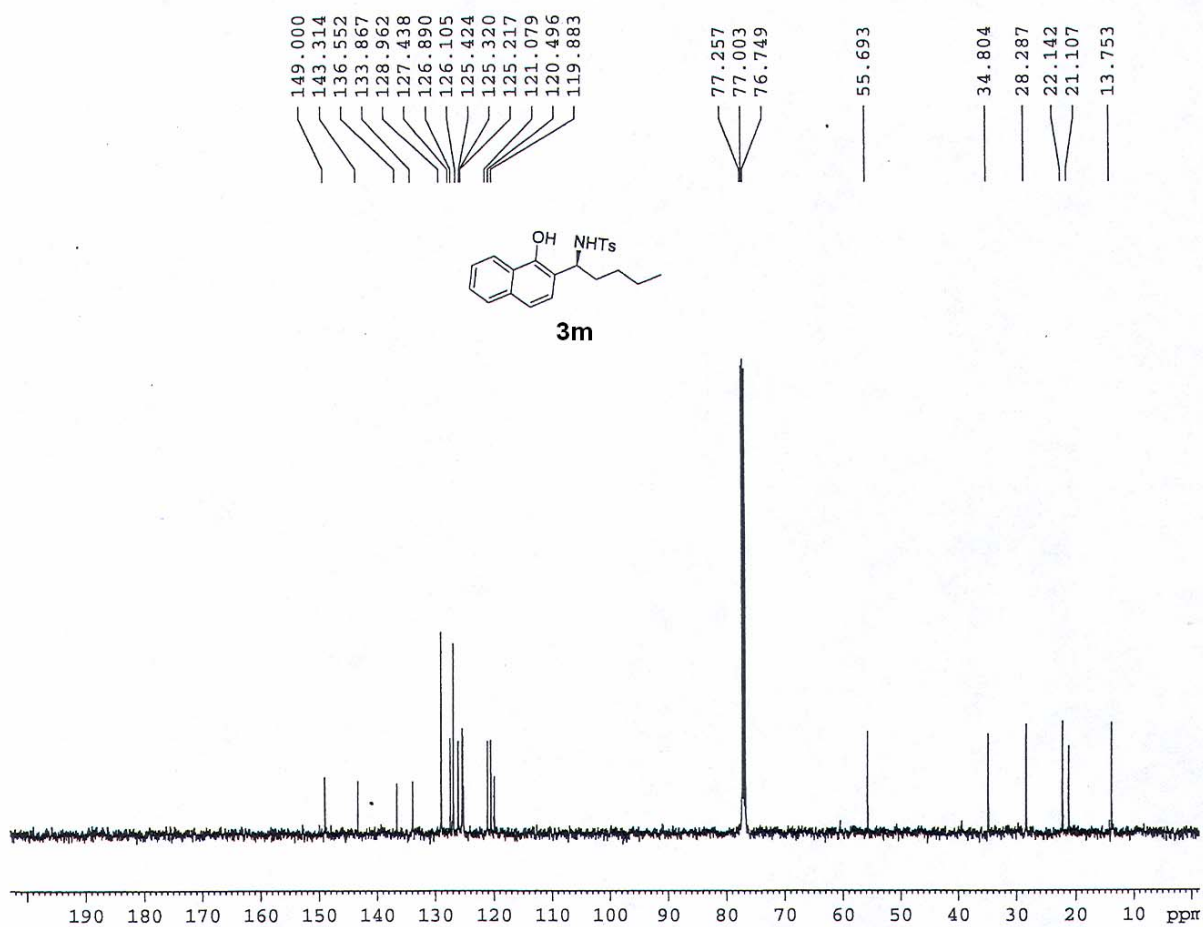



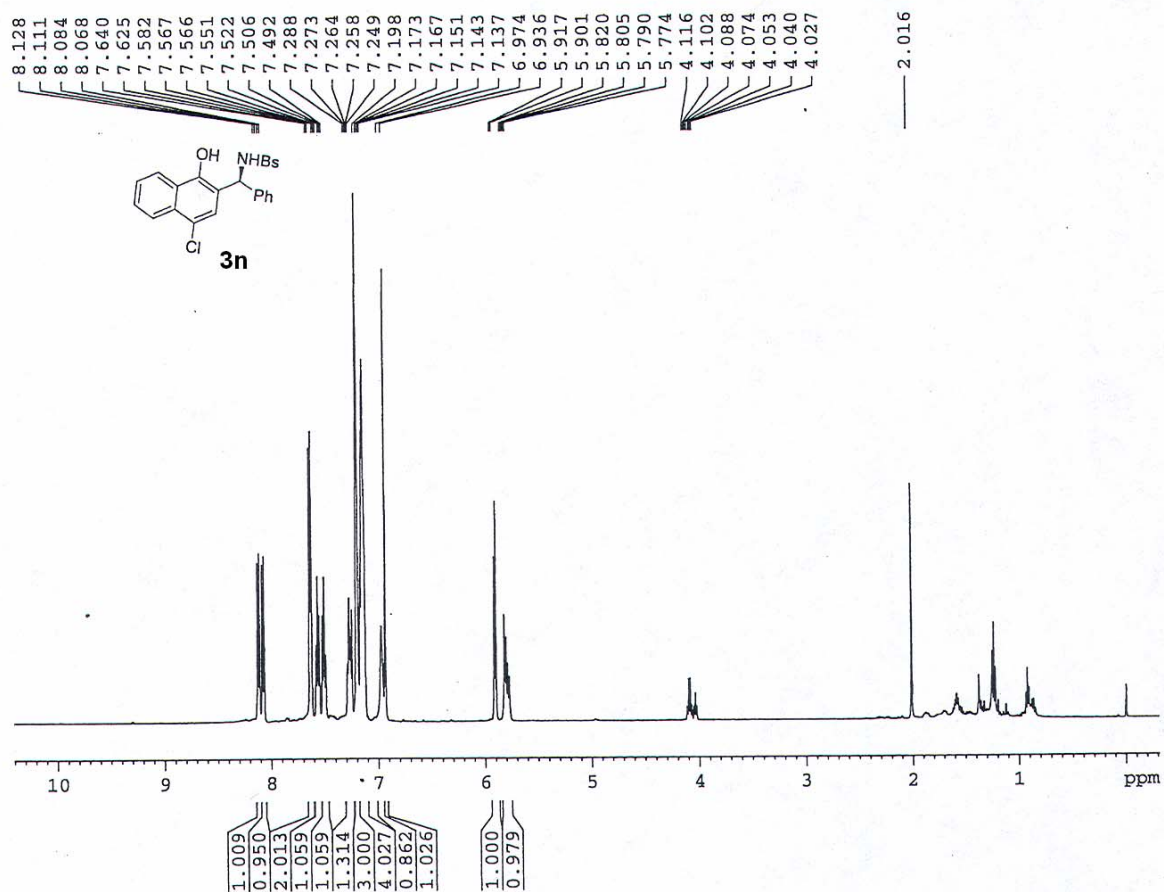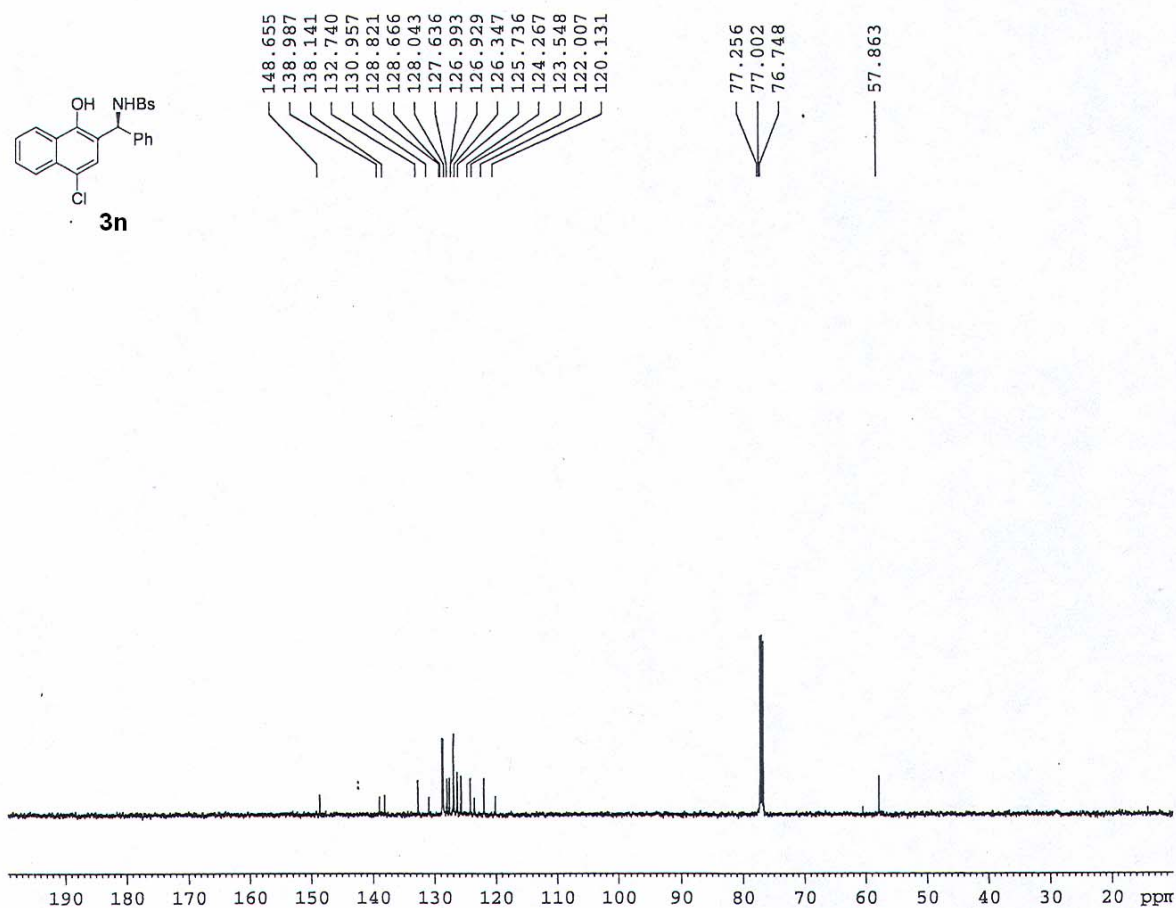

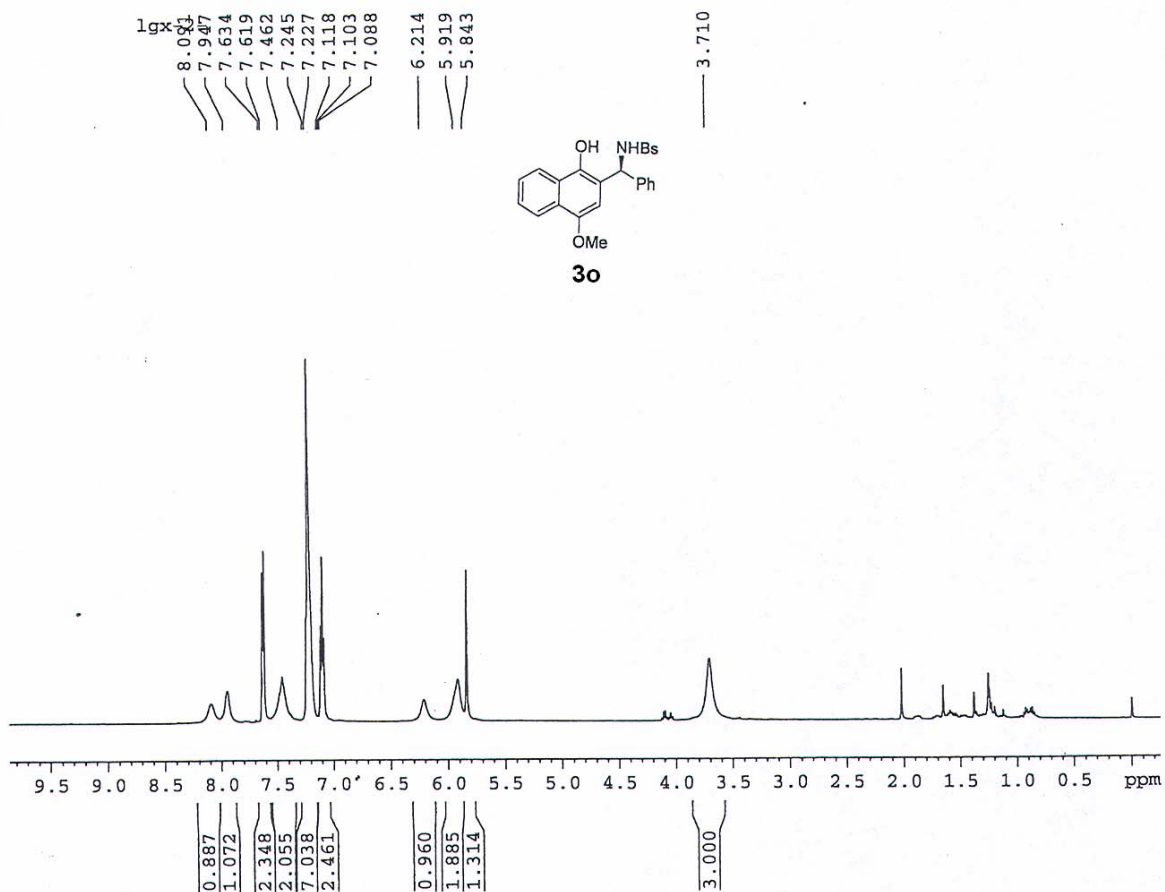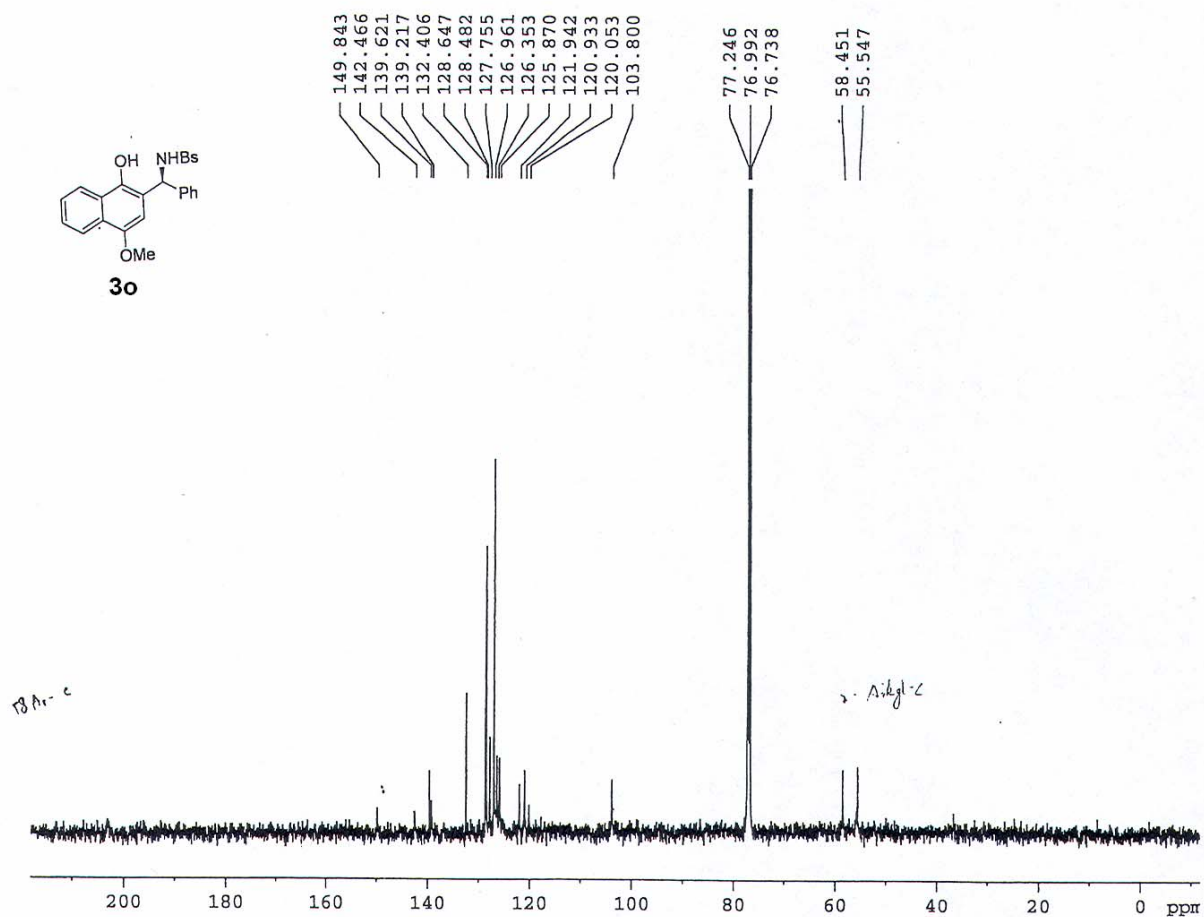

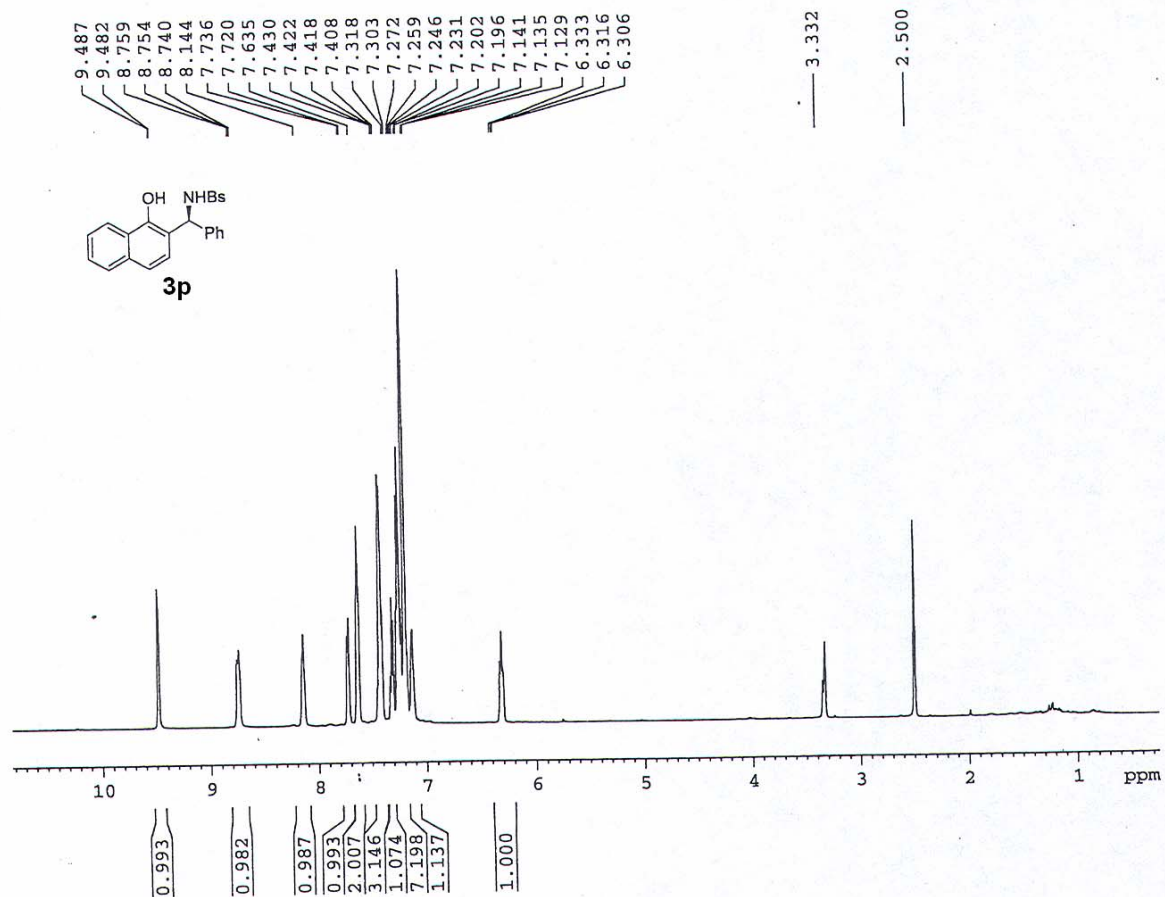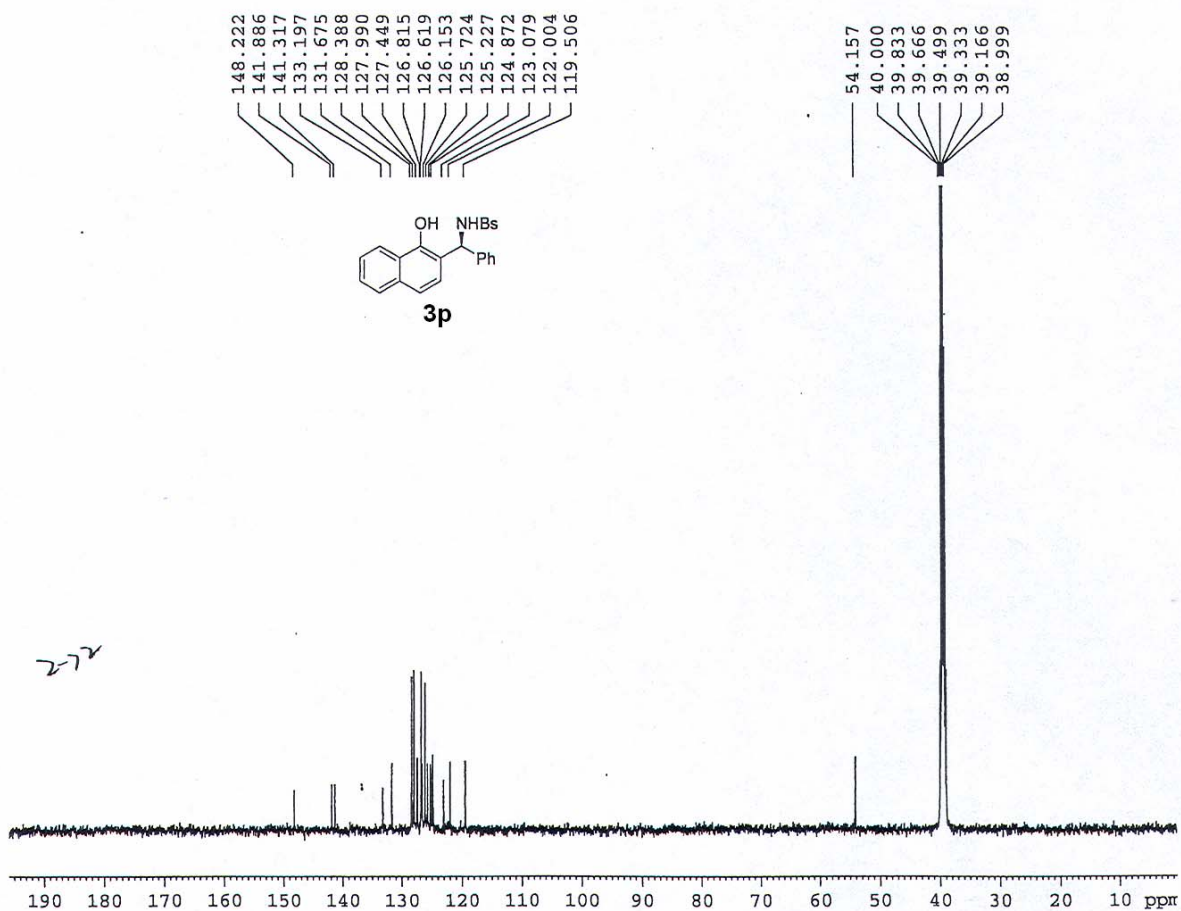

# Compound 3q

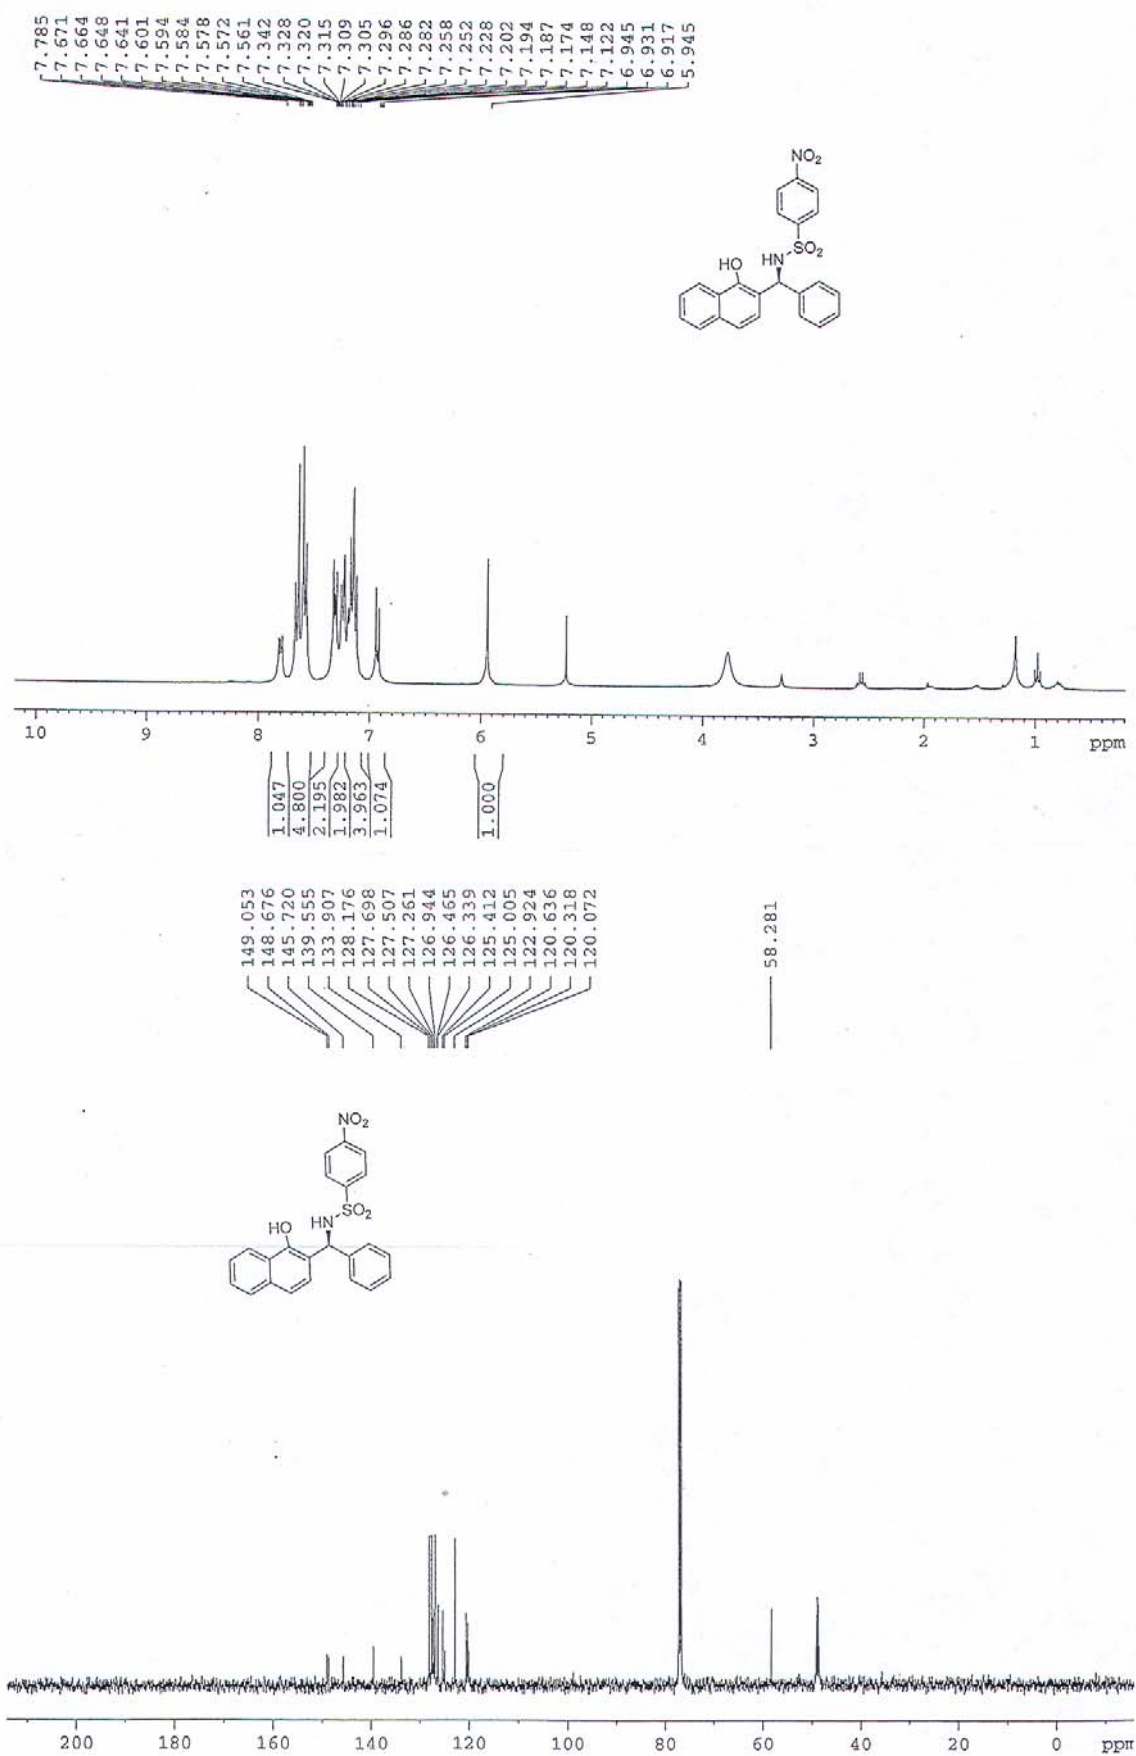



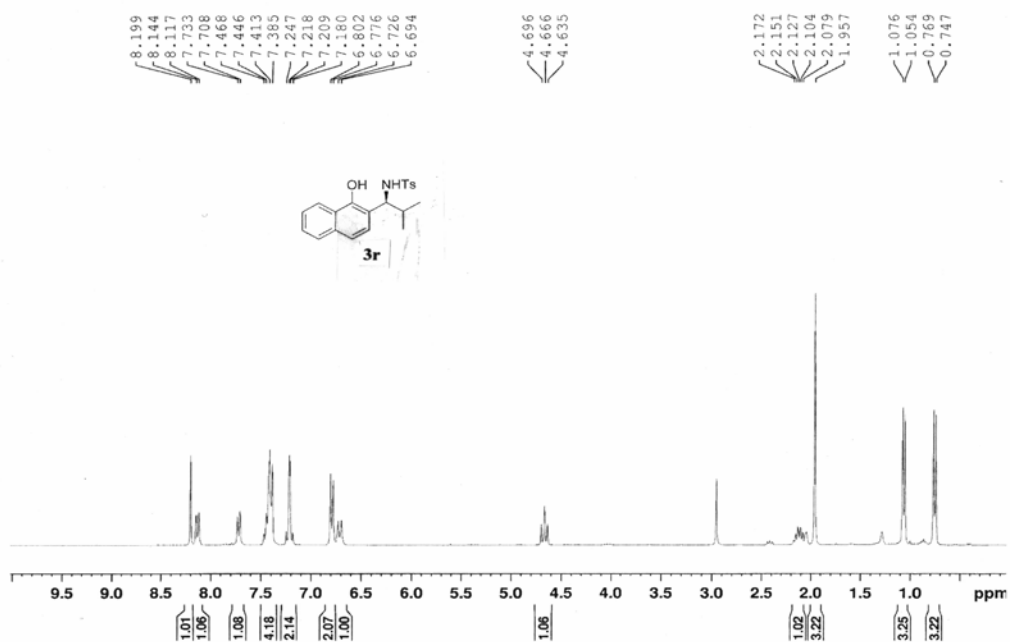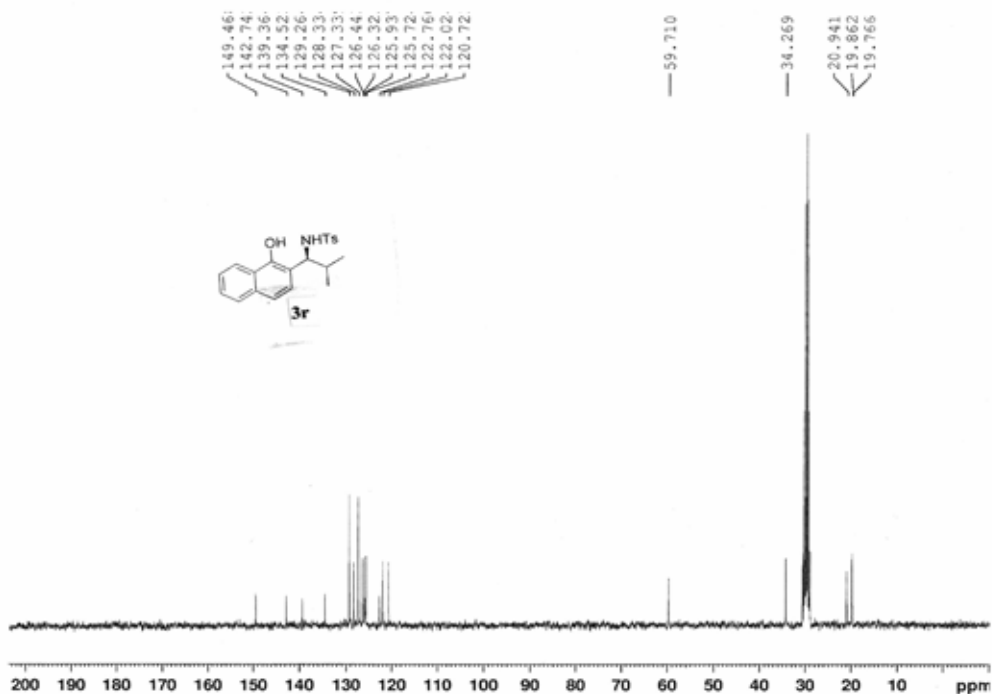

# Compound 4

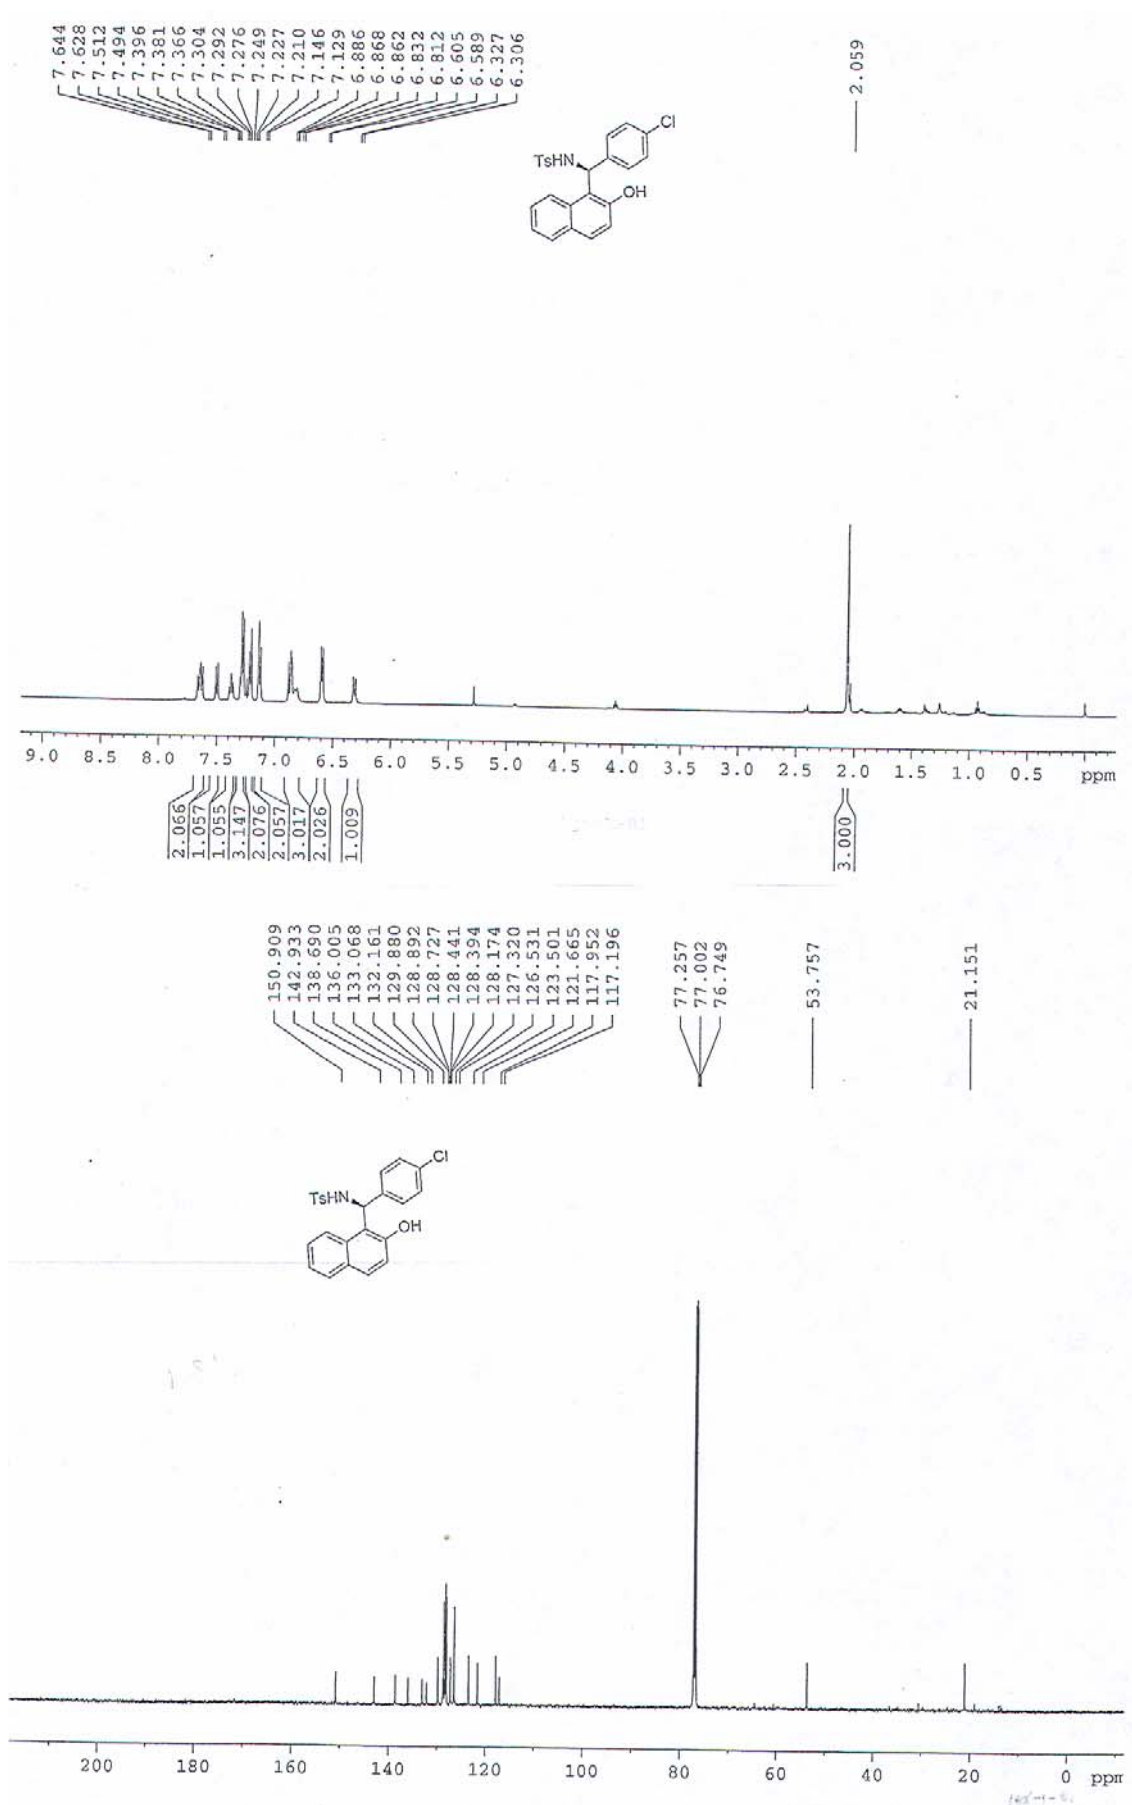



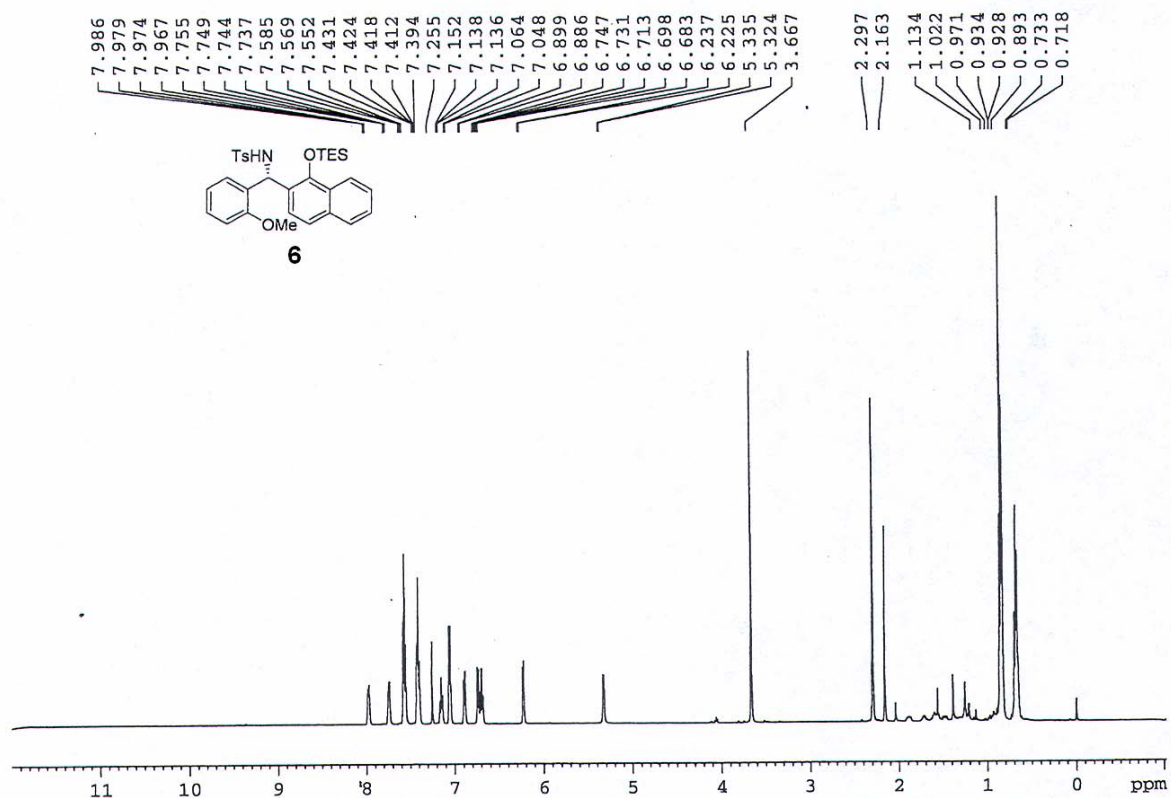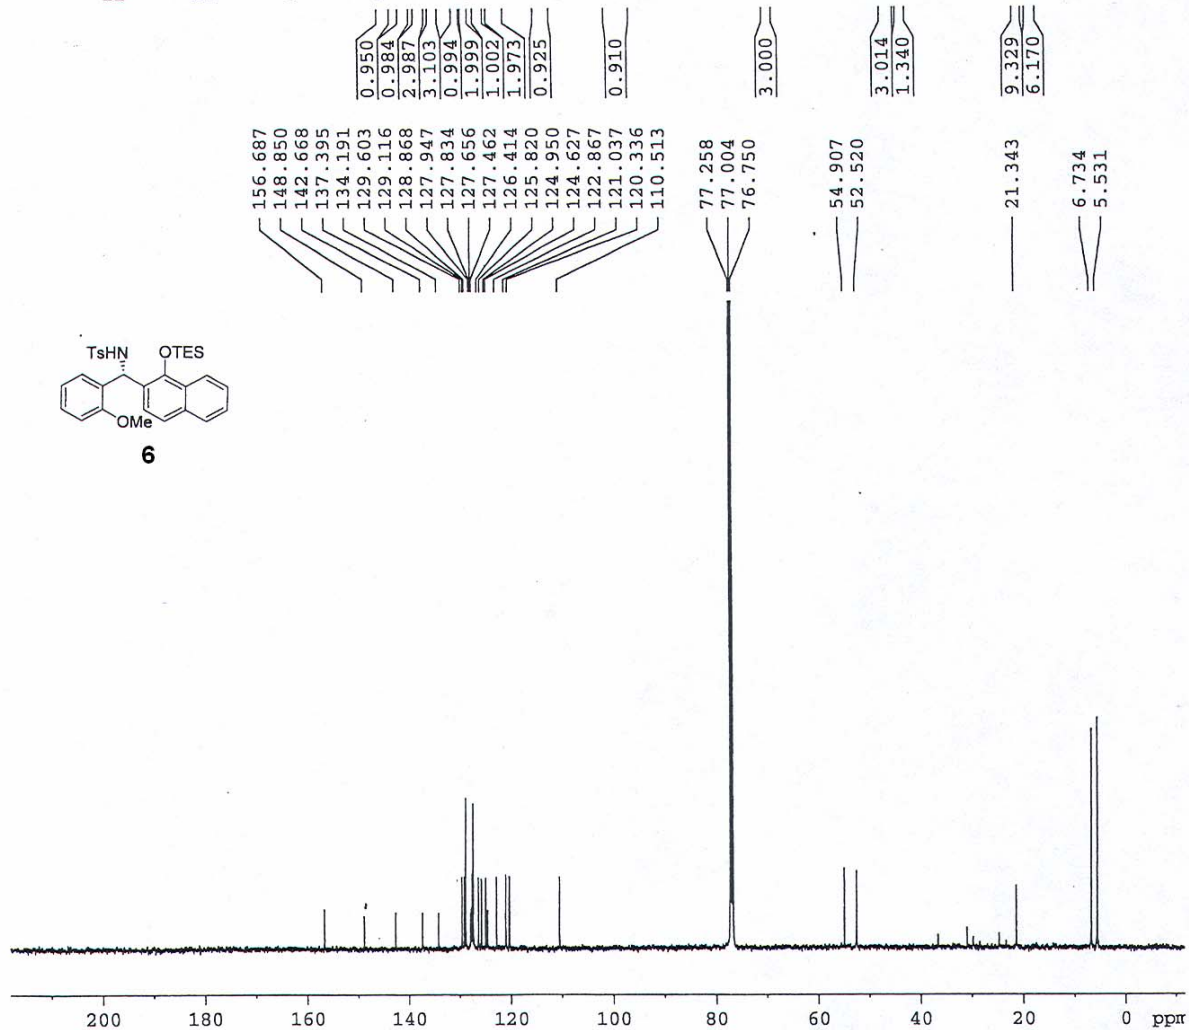

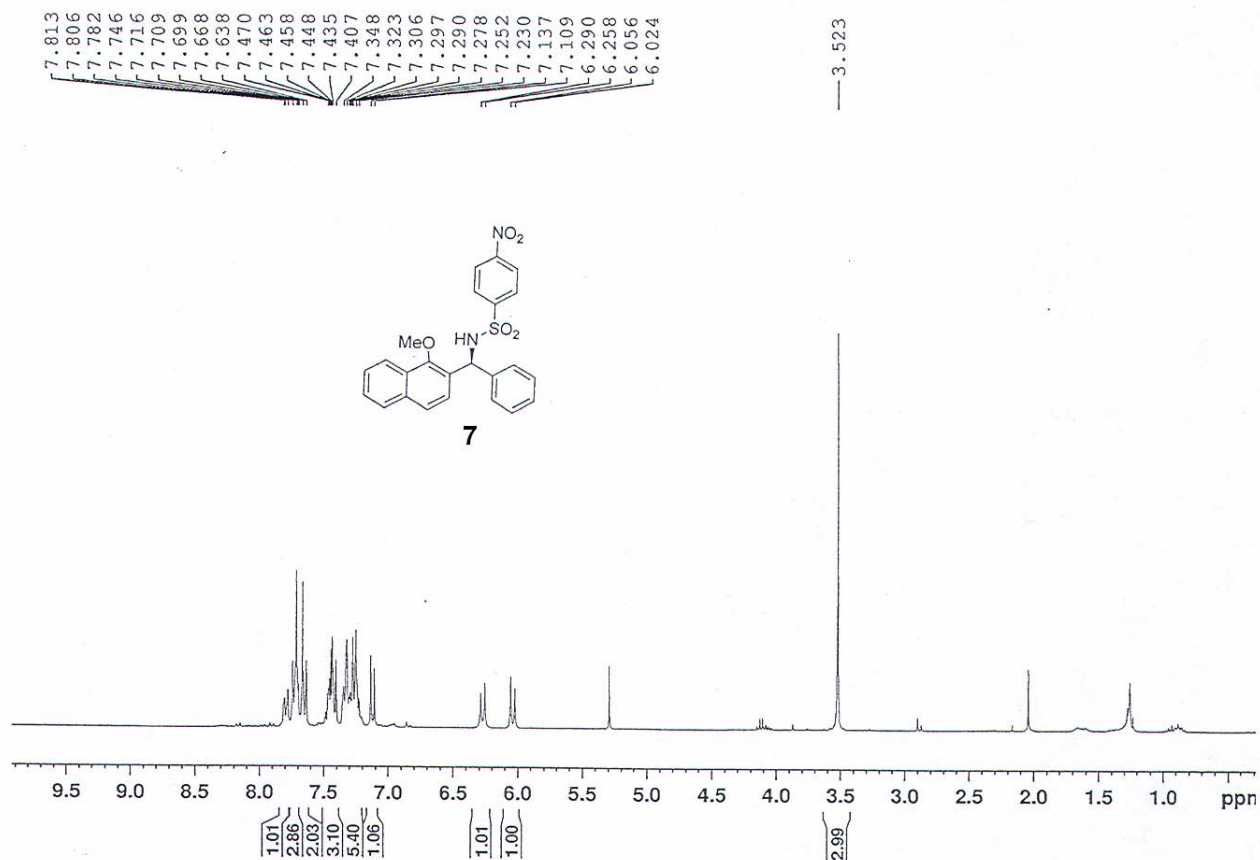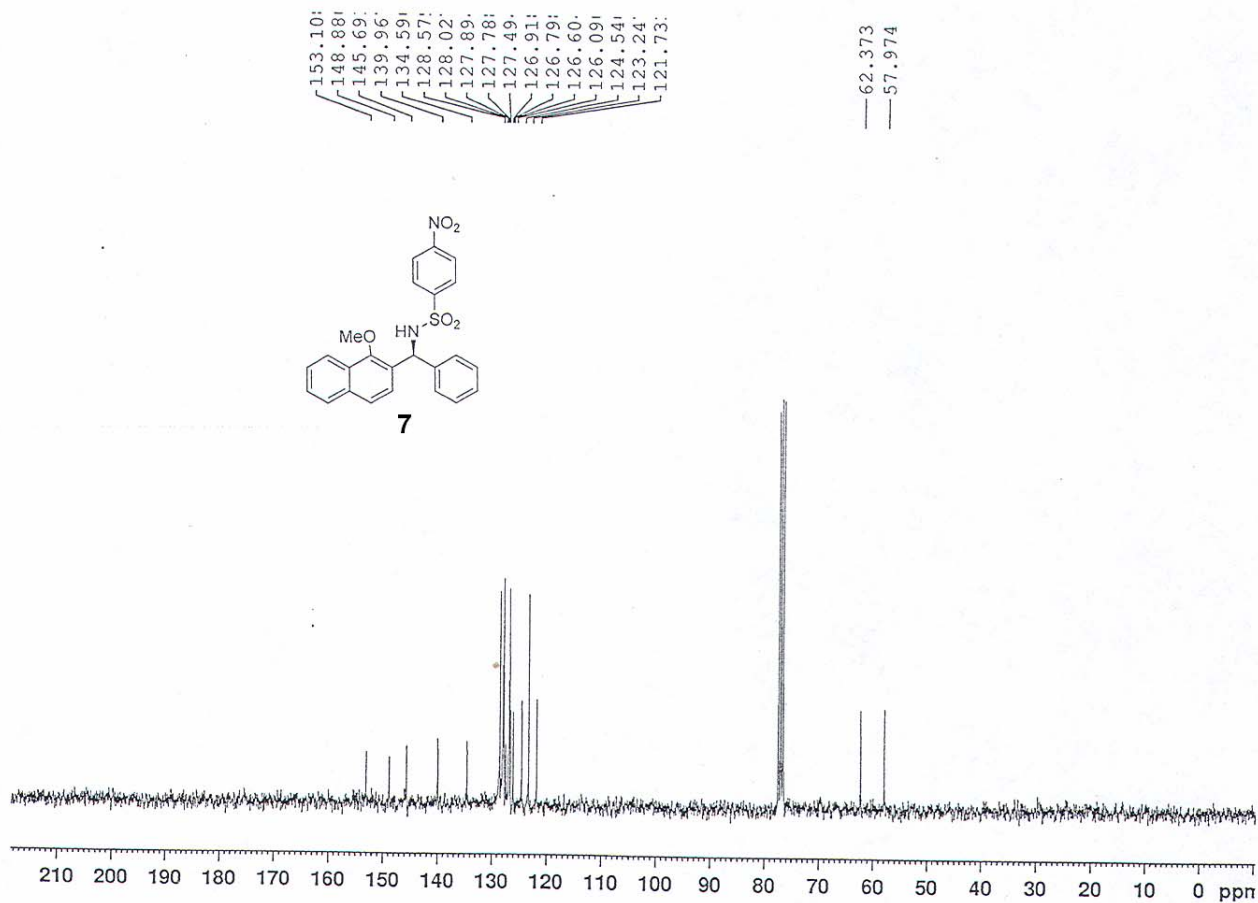

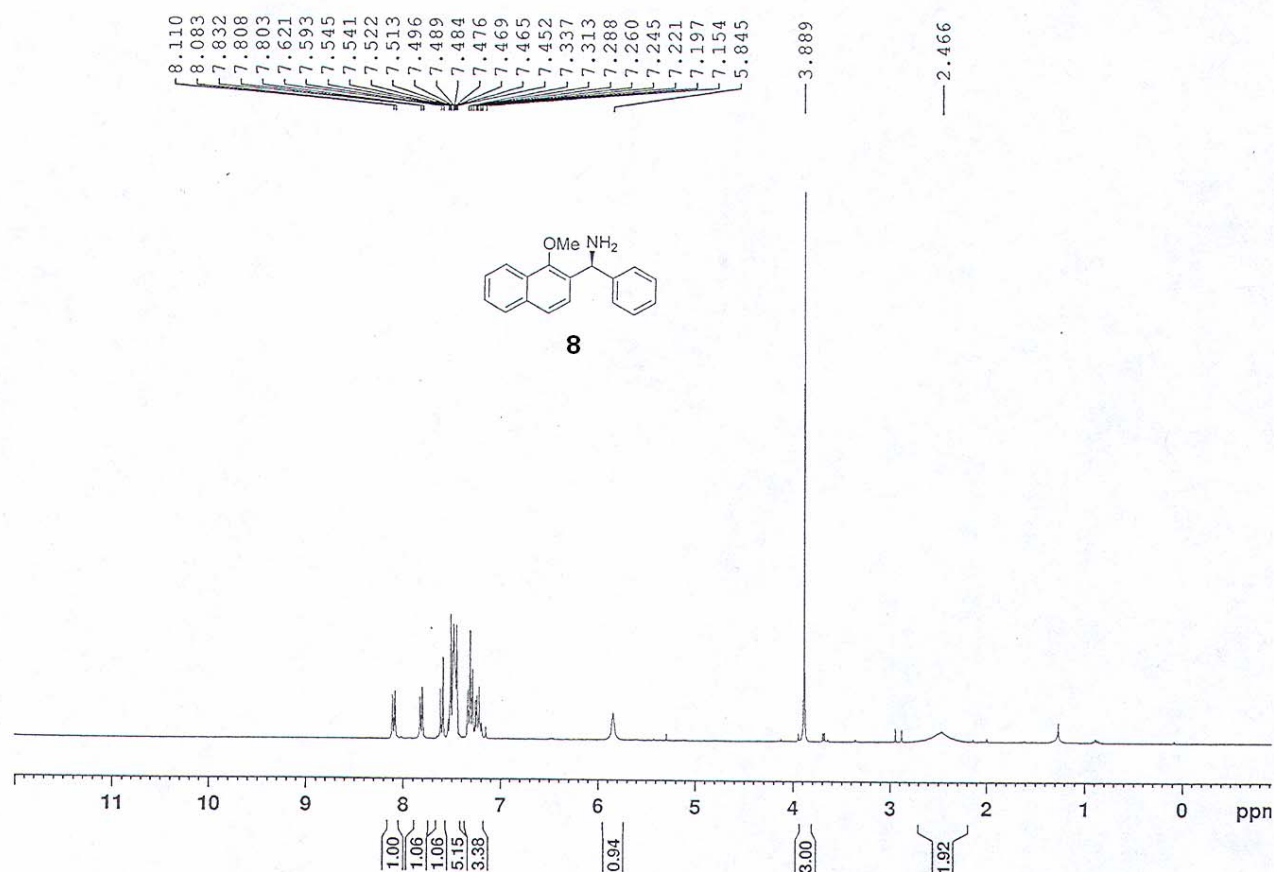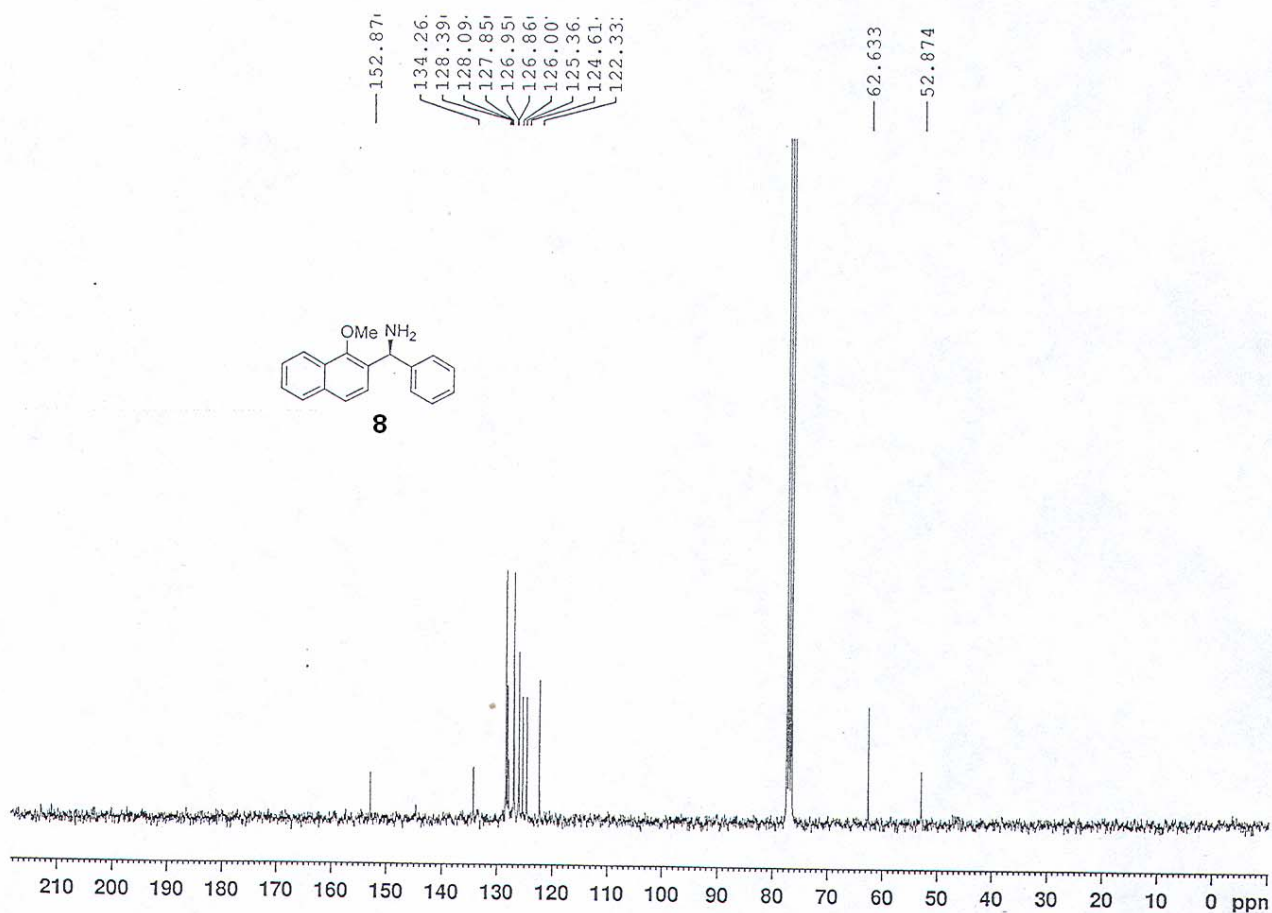



University of New Mexico  
Department of Chemistry

Method Name: C:\EZStart\Projects\WeiWang\aa04.met  
Data File: C:\EZStart\Projects\WeiWang\19x1-15-1.dat  
Date Acquired: 11/15/2007 10:59:26 AM Date Printed: 08/20/2008 01:47:46 PM  
Sample ID: 19x1-15

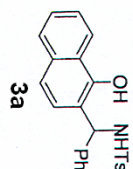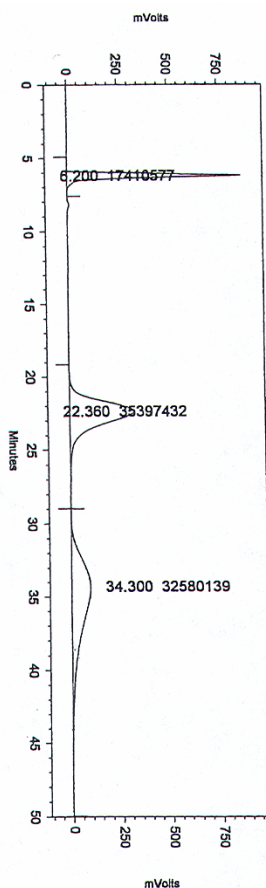

SPD-10AVP  
Ch1-235nm Results

| PK #   | RT     | Area     | Area % |
|--------|--------|----------|--------|
| 2      | 22.360 | 35397432 | 41.455 |
| 3      | 34.300 | 32580139 | 38.155 |
| Totals |        | 67977571 | 79.610 |

University of New Mexico  
Department of Chemistry

Method Name: C:\EZStart\Projects\WeiWang\11.met  
Data File: C:\EZStart\Projects\WeiWang\19x1-35-3.dat  
Date Acquired: 11/29/2007 12:52:47 PM Date Printed: 08/20/2008 01:43:35 PM  
Sample ID: 19x1-35

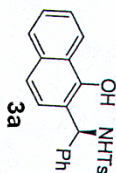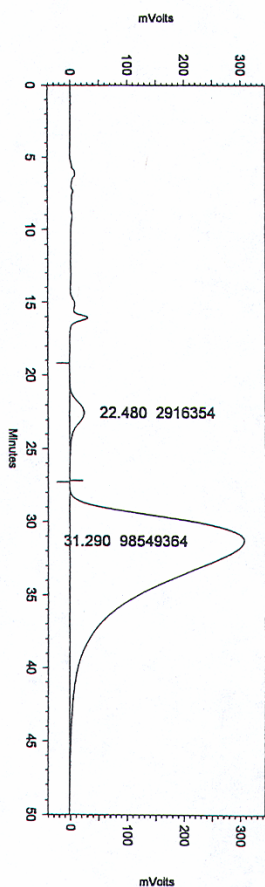

SPD-10AVP  
Ch1-254nm Results

| PK #   | RT     | Area      | Area %  |
|--------|--------|-----------|---------|
| 1      | 22.480 | 2916354   | 2.874   |
| 2      | 31.290 | 98549364  | 97.126  |
| Totals |        | 101465718 | 100.000 |

University Of New Mexico  
Department of Chemistry

Method Name: C:\EZStart\Projects\WeiWang\aa07.met  
Data File: C:\EZStart\Projects\WeiWang\lgx1-37-1.dat  
Date Acquired: 11/30/2007 3:01:37 PM Date Printed: 11/30/2007 04:27:32 PM  
Sample ID: 1gx1-37

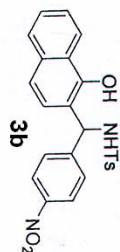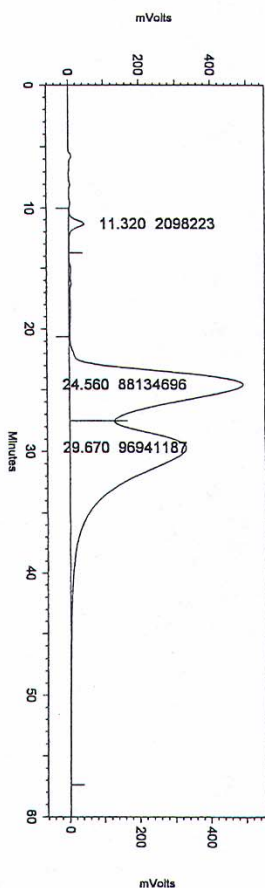

| SPD-10AVP<br>Ch1-254nm Results |        |           |        |  |
|--------------------------------|--------|-----------|--------|--|
| PK #                           | RT     | Area      | Area % |  |
| 2                              | 24.560 | 88134696  | 47.087 |  |
| 3                              | 29.670 | 96941187  | 51.792 |  |
| Totals                         |        | 185075883 | 98.879 |  |

University Of New Mexico  
Department of Chemistry

Method Name: C:\EZStart\Projects\WeiWang\aa07.met  
Data File: C:\EZStart\Projects\WeiWang\lgx1-50-1.dat  
Date Acquired: 11/30/2007 4:30:39 PM Date Printed: 11/30/2007 05:24:29 PM  
Sample ID: 1gx1-50

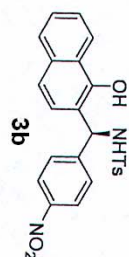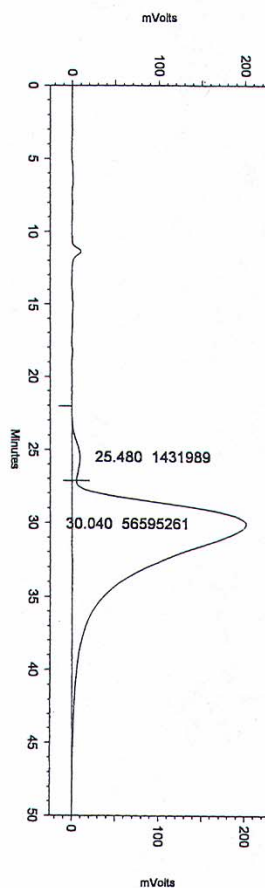

| SPD-10AVP<br>Ch1-254nm Results |        |          |         |  |
|--------------------------------|--------|----------|---------|--|
| PK #                           | RT     | Area     | Area %  |  |
| 1                              | 25.480 | 1431989  | 2.468   |  |
| 2                              | 30.040 | 56595261 | 97.532  |  |
| Totals                         |        | 58027250 | 100.000 |  |



University of New Mexico  
Department of Chemistry

Method Name: C:\EzStart\Projects\WeiWang\1s1368.met  
Data File: C:\EzStart\Projects\WeiWang\1gx1-91-5.dat  
Date Acquired: 1/18/2008 11:28:55 AM Date Printed: 08/20/2008 01:51:39 PM  
Sample ID: 1gx1-91

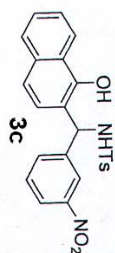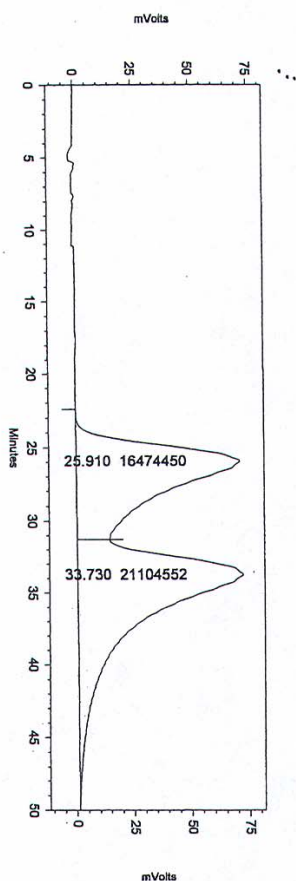

University of New Mexico  
Department of Chemistry

Method Name: C:\EzStart\Projects\WeiWang\1s1368.met  
Data File: C:\EzStart\Projects\WeiWang\1gx2-1-1.dat  
Date Acquired: 1/18/2008 2:10:36 PM Date Printed: 08/20/2008 01:52:23 PM  
Sample ID: 1gx2-1

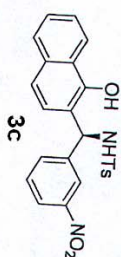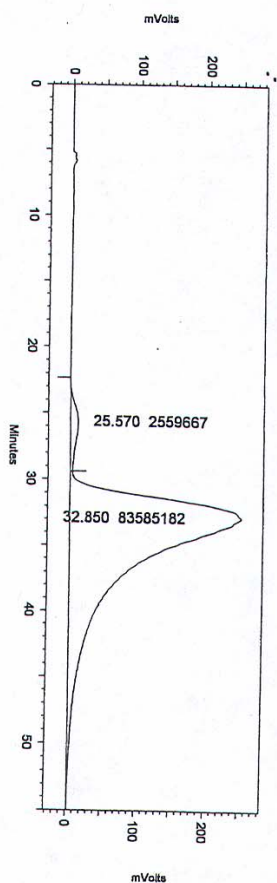

University of New Mexico  
Department of Chemistry

Method Name: C:\MSStart\Projects\WeiWang\z1s1632.met  
Data File: C:\MSStart\Projects\WeiWang\lgx1-831-7.dat  
Date Acquired: 1/28/2008 12:56:52 PM Date Printed: 01/28/2008 01:51:38 PM  
Sample ID: lgx1-831

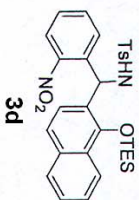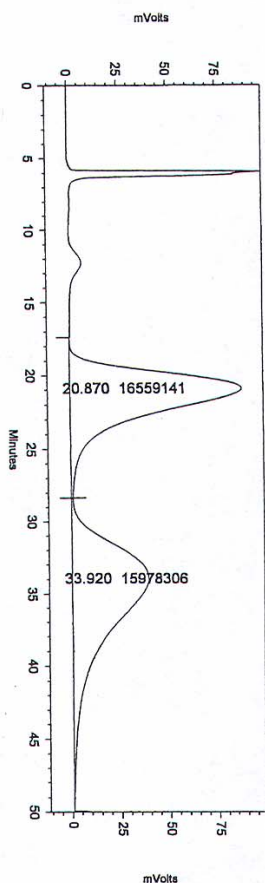

| SPD-10A VP<br>Ch1-254nm Results |        |          |         |
|---------------------------------|--------|----------|---------|
| PK #                            | RT     | Area     | Area %  |
| 1                               | 20.870 | 16559141 | 50.893  |
| 2                               | 33.920 | 15978306 | 49.107  |
| Totals                          |        | 32537447 | 100.000 |

University of New Mexico  
Department of Chemistry

Method Name: C:\MSStart\Projects\WeiWang\z1s1632.met  
Data File: C:\MSStart\Projects\WeiWang\lgx1-861-2.dat  
Date Acquired: 1/28/2008 10:46:44 AM Date Printed: 01/28/2008 11:37:31 AM  
Sample ID: lgx1-861

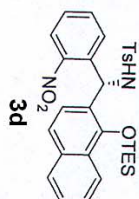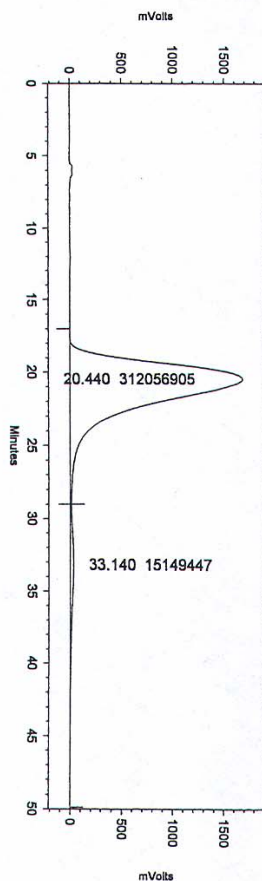

| SPD-10A VP<br>Ch1-235nm Results |        |           |         |
|---------------------------------|--------|-----------|---------|
| PK #                            | RT     | Area      | Area %  |
| 1                               | 20.440 | 312056905 | 95.370  |
| 2                               | 33.140 | 15149447  | 4.630   |
| Totals                          |        | 327206352 | 100.000 |

University of New Mexico  
Department of Chemistry

Method Name: C:\EZStart\Projects\WeiWang\11.met  
Data File: C:\EZStart\Projects\WeiWang\1gx1-39-1.dat  
Date Acquired: 11/29/2007 10:43:25 AM Date Printed: 11/29/2007 11:50:20 AM  
Sample ID: 1gx1-39

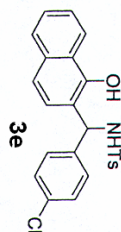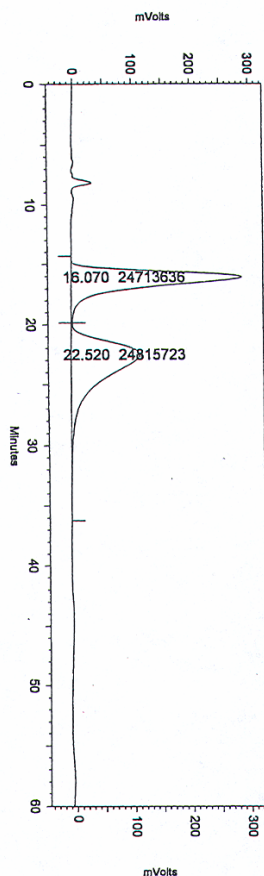

| SPD-10AVP<br>Ch1-254nm Results |        |          |         |  |
|--------------------------------|--------|----------|---------|--|
| PK #                           | RT     | Area     | Area %  |  |
| 1                              | 16.070 | 24713636 | 49.897  |  |
| 2                              | 22.520 | 24815723 | 50.103  |  |
| Totals                         |        | 49529359 | 100.000 |  |

University of New Mexico  
Department of Chemistry

Method Name: C:\EZStart\Projects\WeiWang\11.met  
Data File: C:\EZStart\Projects\WeiWang\1gx1-40-1.dat  
Date Acquired: 11/29/2007 11:55:41 AM Date Printed: 11/29/2007 12:47:00 PM  
Sample ID: 1gx1-40

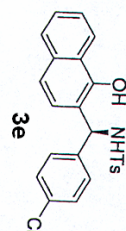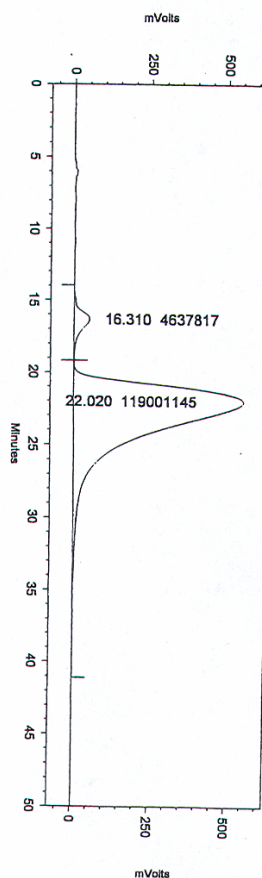

| SPD-10AVP<br>Ch1-254nm Results |        |           |         |  |
|--------------------------------|--------|-----------|---------|--|
| PK #                           | RT     | Area      | Area %  |  |
| 1                              | 16.310 | 4637817   | 3.751   |  |
| 2                              | 22.020 | 119001145 | 96.249  |  |
| Totals                         |        | 123638962 | 100.000 |  |



University of New Mexico  
Department of Chemistry

Method Name: C:\EZStart\Projects\WeiWang\aa09.met  
Data File: C:\EZStart\Projects\WeiWang\1gx1-54-1.dat  
Date Acquired: 12/7/2007 3:02:12 PM Date Printed: 12/07/2007 04:15:40 PM  
Sample ID: 1gx1-54

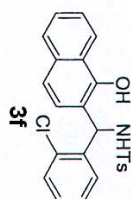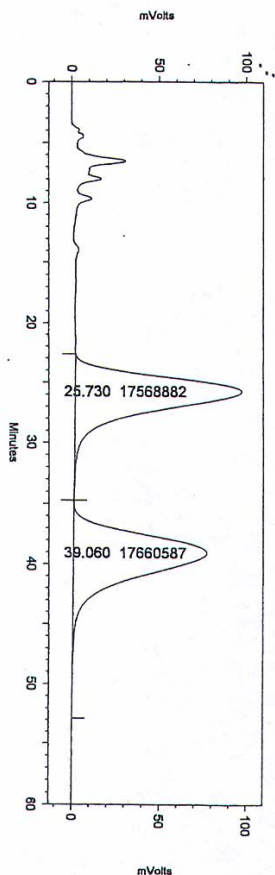

University of New Mexico  
Department of Chemistry

Method Name: C:\EZStart\Projects\WeiWang\aa09.met  
Data File: C:\EZStart\Projects\WeiWang\1gx1-57-2.dat  
Date Acquired: 12/7/2007 5:23:00 PM Date Printed: 12/07/2007 09:10:04 PM  
Sample ID: 1gx1-57

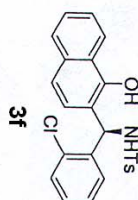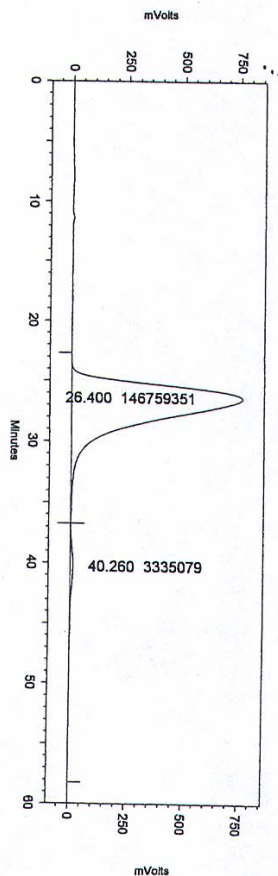

University of New Mexico  
Department of Chemistry

Method Name: C:\EZStart\Projects\WeiWang\aa01.met  
Data File: C:\EZStart\Projects\WeiWang\19x1-78-2.dat  
Date Acquired: 1/2/2008 11:16:53 AM Date Printed: 01/02/2008 11:59:01 AM  
Sample ID: 19x1-78

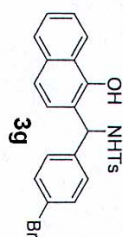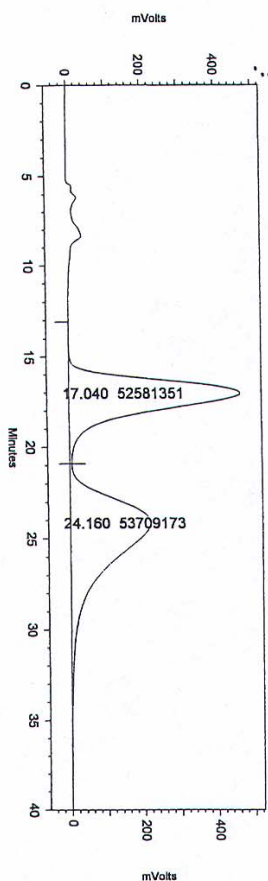

University of New Mexico  
Department of Chemistry

Method Name: C:\EZStart\Projects\WeiWang\aa01.met  
Data File: C:\EZStart\Projects\WeiWang\19x1-87-1.dat  
Date Acquired: 1/2/2008 12:01:09 PM Date Printed: 01/02/2008 12:42:17 PM  
Sample ID: 19x1-87

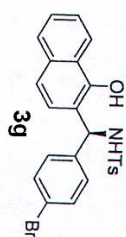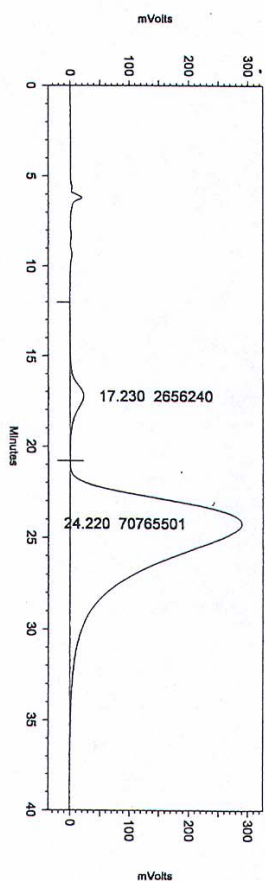

University of New Mexico  
Department of Chemistry

Method Name: C:\EZStart\Projects\WeiWang\1s1560.met  
Data File: C:\EZStart\Projects\WeiWang\1gxl-73-2.dat  
Date Acquired: 12/18/2007 10:30:42 AM Date Printed: 12/18/2007 11:38:31 AM  
Sample ID: 1gxl-73

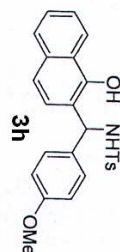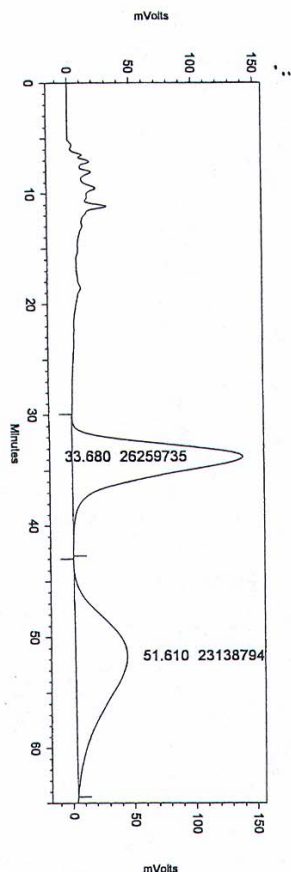

SPD-10Avp  
Ch1-254nm Results

| PK # | RT | Area | Area % |
|------|----|------|--------|
|------|----|------|--------|

|   |        |          |        |
|---|--------|----------|--------|
| 1 | 33.680 | 26259735 | 53.159 |
| 2 | 51.610 | 23138794 | 46.841 |

| Totals |  | 49398529 | 100.000 |
|--------|--|----------|---------|
|--------|--|----------|---------|

University of New Mexico  
Department of Chemistry

Method Name: C:\EZStart\Projects\WeiWang\1s1560.met  
Data File: C:\EZStart\Projects\WeiWang\1gxl-75-2.dat  
Date Acquired: 12/18/2007 11:45:27 AM Date Printed: 12/18/2007 01:04:11 PM  
Sample ID: 1gxl-75

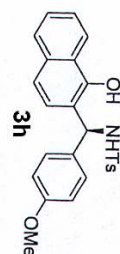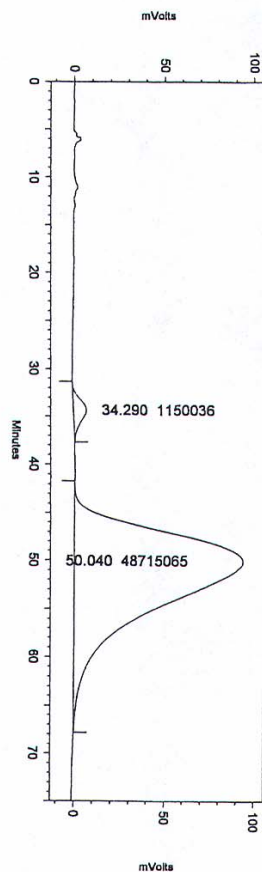

SPD-10Avp  
Ch1-254nm Results

| PK # | RT | Area | Area % |
|------|----|------|--------|
|------|----|------|--------|

|   |        |          |        |
|---|--------|----------|--------|
| 1 | 34.290 | 1150036  | 2.306  |
| 2 | 50.040 | 48715065 | 97.694 |

| Totals |  | 49865101 | 100.000 |
|--------|--|----------|---------|
|--------|--|----------|---------|



University Of New Mexico  
Department of Chemistry

Method Name: C:\EZStart\Projects\WeiWang\aa09.met  
Data File: C:\EZStart\Projects\WeiWang\1gx1-55-2.dat  
Date Acquired: 12/8/2007 11:52:20 AM Date Printed: 12/10/2007 11:02:46 AM  
Sample ID: 1gx1-56

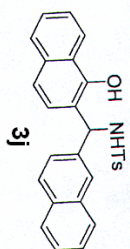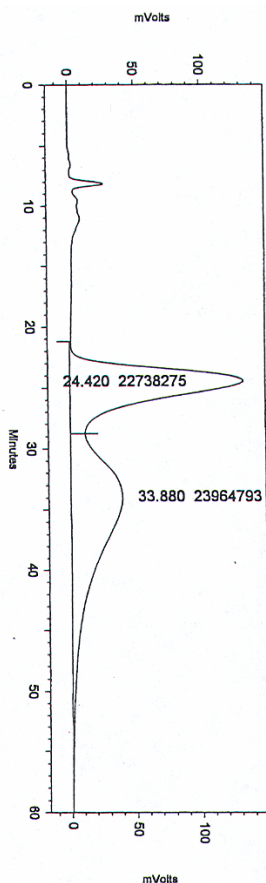

University Of New Mexico  
Department of Chemistry

Method Name: C:\EZStart\Projects\WeiWang\ff55.met  
Data File: C:\EZStart\Projects\WeiWang\1gx1-59-1.dat  
Date Acquired: 12/10/2007 11:33:27 AM Date Printed: 12/10/2007 12:55:31 PM  
Sample ID: 1gx1-55

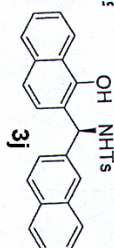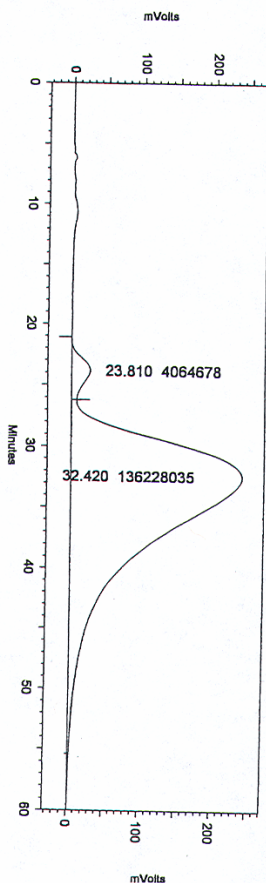

University of New Mexico  
Department of Chemistry

Method Name: C:\EZStart\Projects\WeiWang\zt1s1867.met  
Data File: C:\EZStart\Projects\WeiWang\zt0357a-ash-2.dat  
Date Acquired: 6/25/2008 4:39:19 PM Date Printed: 06/25/2008 05:55:35 PM  
Sample ID: zt0357a

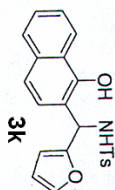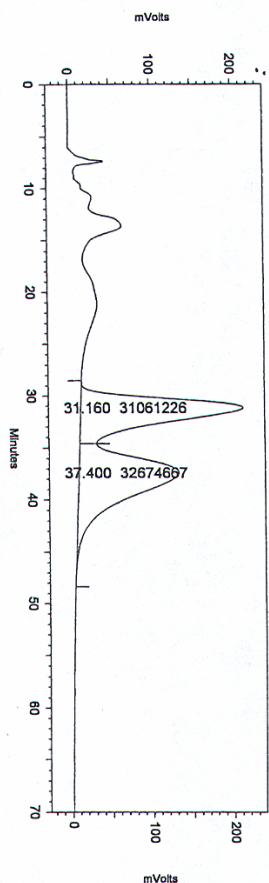

| SPD-10AVP<br>Ch1-254nm Results |        |          |         |  |
|--------------------------------|--------|----------|---------|--|
| PK #                           | RT     | Area     | Area %  |  |
| 1                              | 31.160 | 31061226 | 48.734  |  |
| 2                              | 37.400 | 32674667 | 51.266  |  |
| Totals                         |        | 63735893 | 100.000 |  |

University of New Mexico  
Department of Chemistry

Method Name: C:\EZStart\Projects\WeiWang\zt1s1867.met  
Data File: C:\EZStart\Projects\WeiWang\zt0357b-ash-1.dat  
Date Acquired: 6/25/2008 5:57:08 PM Date Printed: 06/26/2008 11:07:05 AM  
Sample ID: zt0357b

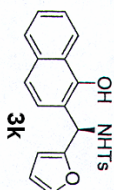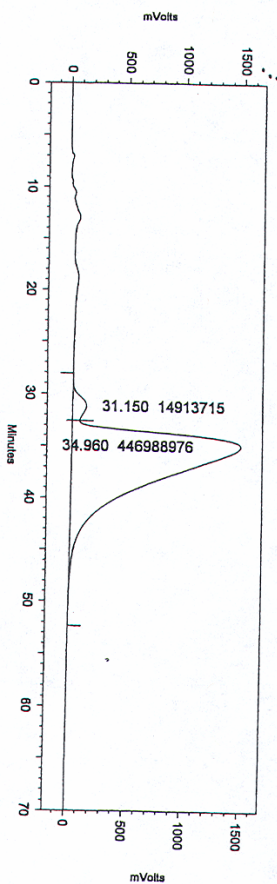

| SPD-10AVP<br>Ch1-254nm Results |        |           |         |  |
|--------------------------------|--------|-----------|---------|--|
| PK #                           | RT     | Area      | Area %  |  |
| 1                              | 31.150 | 14913715  | 3.229   |  |
| 2                              | 34.960 | 446988976 | 96.771  |  |
| Totals                         |        | 461902691 | 100.000 |  |



University of New Mexico  
Department of Chemistry

Method Name: C:\EZStart\Projects\WeiWang\ztz0373.met  
Data File: C:\EZStart\Projects\WeiWang\ztz0373-oj-1.dat  
Date Acquired: 7/3/2008 3:50:24 PM Date Printed: 07/03/2008 04:50:57 PM  
Sample ID: ztz0373

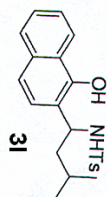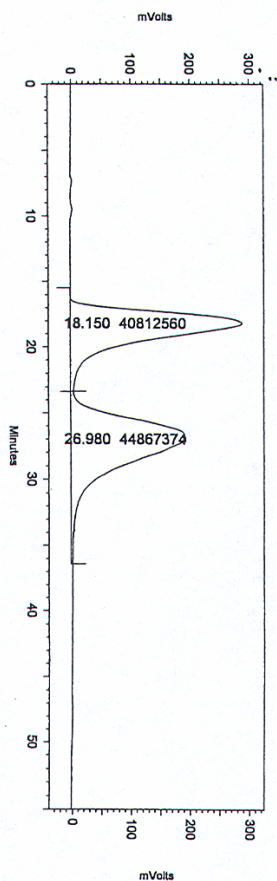

SPD-10AVP  
Ch1-254nm Results

| PK # | RT     | Area     | Area % |
|------|--------|----------|--------|
| 1    | 18.150 | 40812560 | 47.634 |
| 2    | 26.980 | 44867374 | 52.366 |

| Totals | 85679934 | 100.000 |
|--------|----------|---------|
|--------|----------|---------|

University of New Mexico  
Department of Chemistry

Method Name: C:\EZStart\Projects\WeiWang\ztz0327.met  
Data File: C:\EZStart\Projects\WeiWang\ztz0327-oj.dat  
Date Acquired: 7/3/2008 4:52:43 PM Date Printed: 07/03/2008 05:42:24 PM  
Sample ID: ztz0327

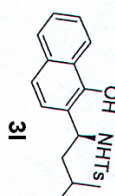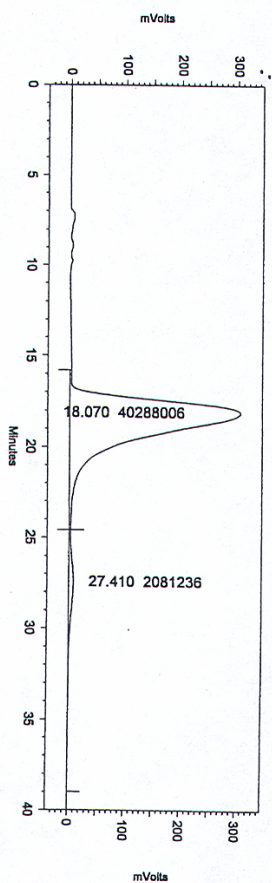

SPD-10AVP  
Ch1-254nm Results

| PK # | RT     | Area     | Area % |
|------|--------|----------|--------|
| 1    | 18.070 | 40288006 | 95.088 |
| 2    | 27.410 | 2081236  | 4.912  |

| Totals | 42369242 | 100.000 |
|--------|----------|---------|
|--------|----------|---------|

University of New Mexico  
Department of Chemistry

Method Name: C:\EZStart\Projects\WeiWang\zt1867.met  
Data File: C:\EZStart\Projects\WeiWang\zt20367-oj-4.dat  
Date Acquired: 7/4/2008 9:53:56 AM Date Printed: 07/04/2008 10:55:52 AM  
Sample ID: zt20367

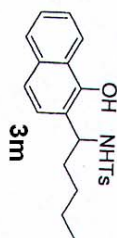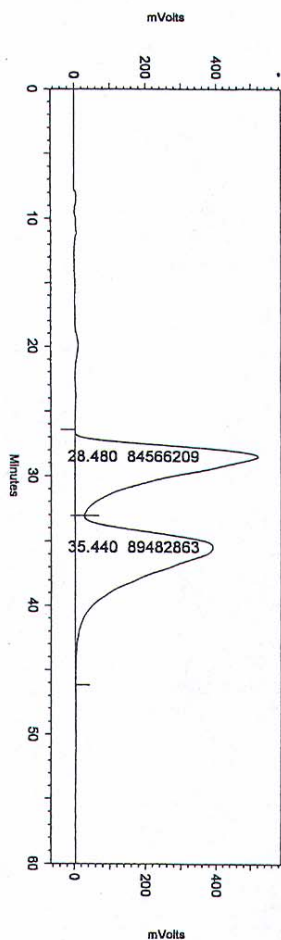

SPD-10AVP  
Ch1-254nm Results

| PK # | RT     | Area     | Area % |
|------|--------|----------|--------|
| 1    | 28.480 | 84566209 | 48.588 |
| 2    | 35.440 | 89482863 | 51.412 |

University of New Mexico  
Department of Chemistry

Method Name: C:\EZStart\Projects\WeiWang\zt1867.met  
Data File: C:\EZStart\Projects\WeiWang\zt20368-oj-1.dat  
Date Acquired: 7/4/2008 10:58:41 AM Date Printed: 07/04/2008 12:04:34 PM  
Sample ID: zt20368

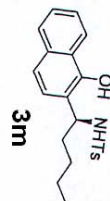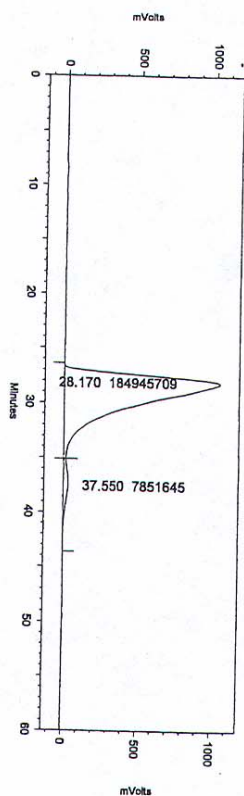

SPD-10AVP  
Ch1-254nm Results

| PK # | RT     | Area      | Area % |
|------|--------|-----------|--------|
| 1    | 28.170 | 184945709 | 95.928 |
| 2    | 37.550 | 7851645   | 4.072  |

University of New Mexico  
Department of Chemistry

Method Name: C:\EZStart\Projects\WeiWang\aa07.met  
Data File: C:\EZStart\Projects\WeiWang\lgx2-8-1.dat  
Date Acquired: 1/14/2008 12:13:37 PM Date Printed: 01/14/2008 01:16:18 PM  
Sample ID: 1gx2-8

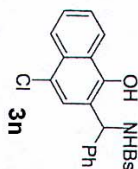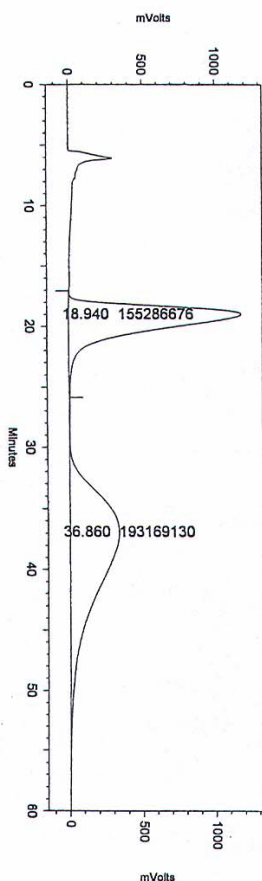

SPD-10AVP  
Ch1-254nm Results

| PK #   | RT     | Area      | Area %  |
|--------|--------|-----------|---------|
| 1      | 18.940 | 155286676 | 44.564  |
| 2      | 36.860 | 193169130 | 55.436  |
| Totals |        | 348455806 | 100.000 |

University of New Mexico  
Department of Chemistry

Method Name: C:\EZStart\Projects\WeiWang\z1a1368.met  
Data File: C:\EZStart\Projects\WeiWang\lgx2-1-1.dat  
Date Acquired: 1/18/2008 2:10:36 PM Date Printed: 01/18/2008 03:05:09 PM  
Sample ID: 1gx2-1

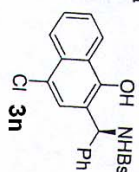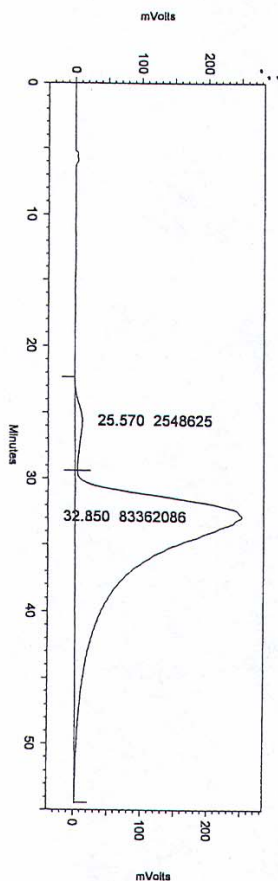

SPD-10AVP  
Ch1-254nm Results

| PK #   | RT     | Area     | Area %  |
|--------|--------|----------|---------|
| 1      | 25.570 | 2548625  | 2.967   |
| 2      | 32.850 | 83362086 | 97.033  |
| Totals |        | 85910711 | 100.000 |



University of New Mexico  
Department of Chemistry

Method Name: C:\EZStart\Projects\WeiWang\aa07.met  
Data File: C:\EZStart\Projects\WeiWang\lgx2-9-1.dat  
Date Acquired: 1/14/2008 2:22:59 PM Date Printed: 01/14/2008 03:34:30 PM  
Sample ID: lgx2-9

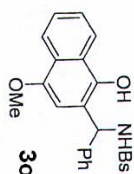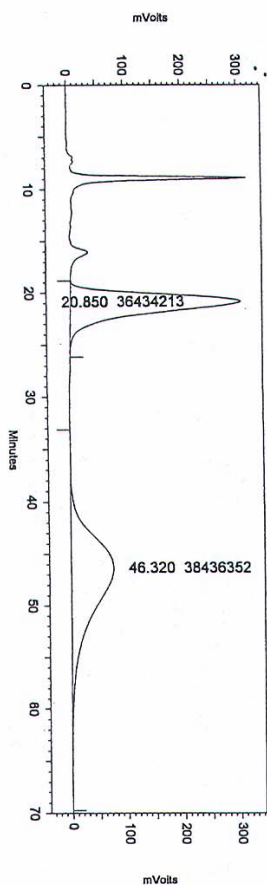

University of New Mexico  
Department of Chemistry

Method Name: C:\EZStart\Projects\WeiWang\aa004.met  
Data File: C:\EZStart\Projects\WeiWang\lgx2-12-1.dat  
Date Acquired: 1/15/2008 2:57:54 PM Date Printed: 01/15/2008 04:10:40 PM  
Sample ID: lgx2-12

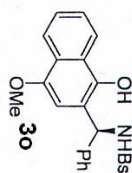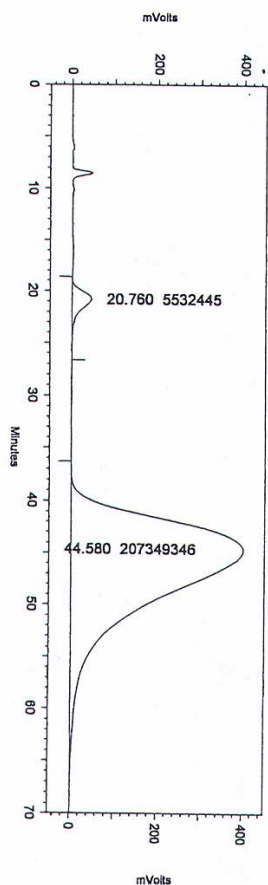

University of New Mexico  
Department of Chemistry

Method Name: C:\EZStart\Projects\WeiWang\ffl.met  
Data File: C:\EZStart\Projects\WeiWang\lgx1-72-1.dat  
Date Acquired: 12/15/2007 3:42:40 PM Date Printed: 12/15/2007 04:39:22 PM  
Sample ID: lgx1-72

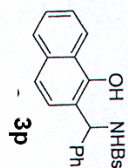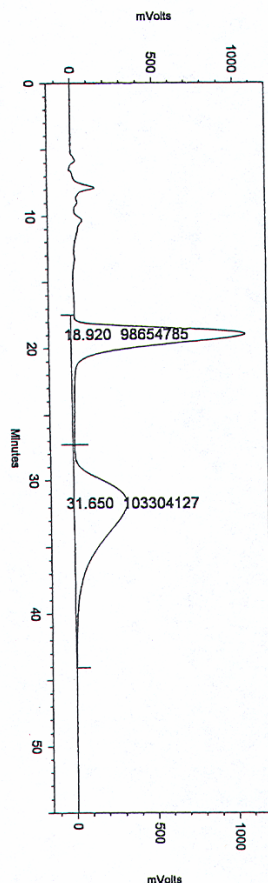

SPD-10AVP  
Ch1-254nm Results

| PK # | RT     | Area      | Area % |
|------|--------|-----------|--------|
| 1    | 18.920 | 98654785  | 48.849 |
| 2    | 31.650 | 103304127 | 51.151 |

|        |  |           |         |
|--------|--|-----------|---------|
| Totals |  | 201958912 | 100.000 |
|--------|--|-----------|---------|

University of New Mexico  
Department of Chemistry

Method Name: C:\EZStart\Projects\WeiWang\aa01.met  
Data File: C:\EZStart\Projects\WeiWang\lgx1-76-2.dat  
Date Acquired: 12/31/2007 4:41:05 PM Date Printed: 01/01/2008 03:17:29 PM  
Sample ID: lgx1-76

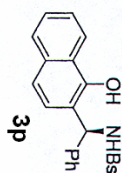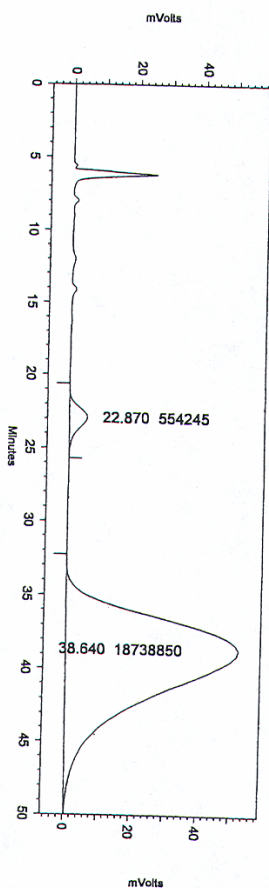

SPD-10AVP  
Ch1-254nm Results

| PK # | RT     | Area     | Area % |
|------|--------|----------|--------|
| 1    | 22.870 | 554245   | 2.873  |
| 2    | 38.640 | 18738850 | 97.127 |

|        |  |          |         |
|--------|--|----------|---------|
| Totals |  | 19293095 | 100.000 |
|--------|--|----------|---------|

# Compound 3q

## University of New Mexico Department of Chemistry & Chemical Biology

Method Name: C:\EzStart\Projects\Default\Method\123.met  
Data File: C:\EzStart\Projects\Default\Data\zsh\zsl-12-28-AS-t  
Data Acquired: 10/31/2010 6:44:08 PM  
Date Printed: 10/31/2010 10:43:38 PM  
Sample ID: zsl-12-28

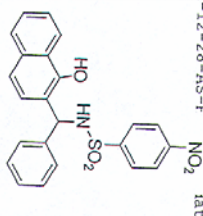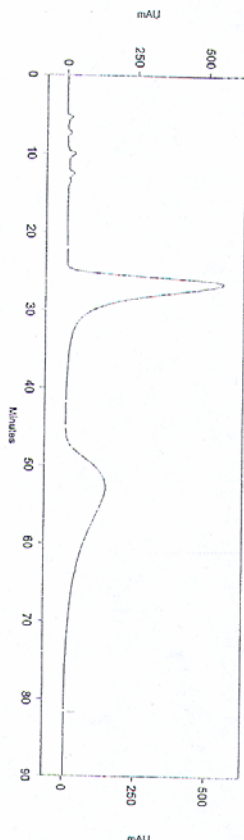

| SPD-20A<br>Ch2-210nm Results |                |          |              |  |
|------------------------------|----------------|----------|--------------|--|
| PK #                         | Retention Time | Area     | Area Percent |  |
| 1                            | 26.458         | 10588593 | 51.606       |  |
| 2                            | 52.683         | 9929474  | 48.394       |  |
| Totals                       |                | 20518067 | 100.000      |  |

## University of New Mexico Department of Chemistry & Chemical Biology

Method Name: C:\EzStart\Projects\Default\Method\123.met  
Data File: C:\EzStart\Projects\Default\Data\zsh\zsl-12-29-AS  
Data Acquired: 10/31/2010 9:09:42 PM  
Date Printed: 10/31/2010 10:44:51 PM  
Sample ID: zsl-12-29

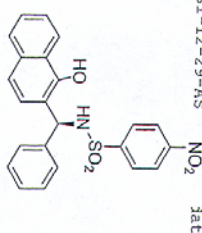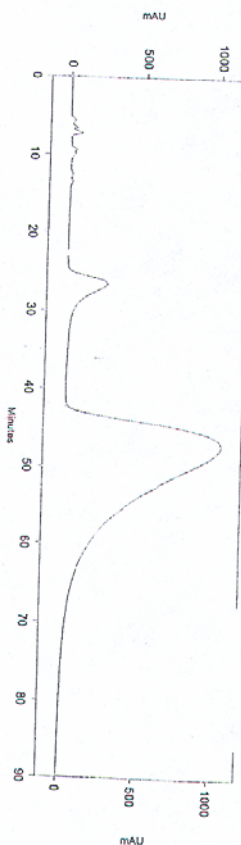

| SPD-20A<br>Ch2-210nm Results |                |           |              |  |
|------------------------------|----------------|-----------|--------------|--|
| PK #                         | Retention Time | Area      | Area Percent |  |
| 1                            | 26.383         | 54505419  | 7.284        |  |
| 2                            | 47.133         | 693805357 | 92.716       |  |
| Totals                       |                | 748310776 | 100.000      |  |



# Compound 4

UNIVERSITY OF NEW MEXICO  
Department of Chemistry

Method Name: C:\EZStart\Projects\WeiWang\lgxl-81b-1.dat  
Data File: C:\EZStart\Projects\WeiWang\lgxl-81b-1.dat  
Date Acquired: 12/24/2007 11:30:02 AM Date Printed: 12/24/2007 11:56:05 AM  
Sample ID: 19xl-81b

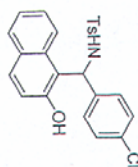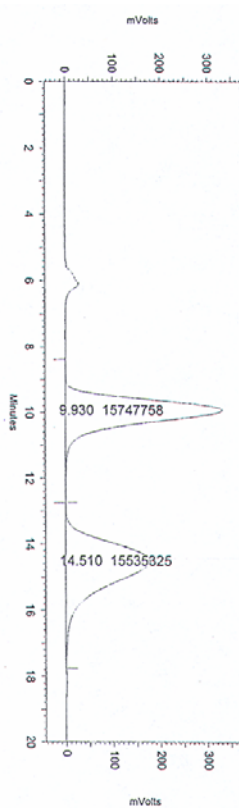

| SPD-10AVP<br>Chl-254nm Results |       |          |        |
|--------------------------------|-------|----------|--------|
| PK #                           | RT    | Area     | Area % |
| 1                              | 9.930 | 15747758 | 50.340 |

UNIVERSITY OF NEW MEXICO  
Department of Chemistry

Method Name: C:\EZStart\Projects\WeiWang\lgxl-53-1.dat  
Data File: C:\EZStart\Projects\WeiWang\lgxl-53-1.dat  
Date Acquired: 12/5/2007 11:19:11 AM Date Printed: 12/05/2007 11:41:07 AM  
Sample ID: 19xl-53

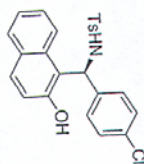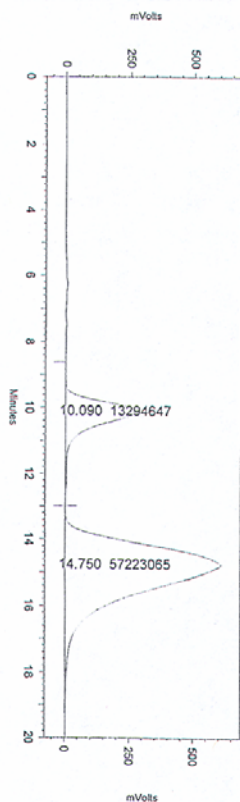

| SPD-10AVP<br>Chl-254nm Results |        |          |         |
|--------------------------------|--------|----------|---------|
| PK #                           | RT     | Area     | Area %  |
| 1                              | 10.090 | 13294647 | 18.853  |
| 2                              | 14.750 | 57223065 | 81.147  |
| Totals                         |        | 70517712 | 100.000 |

# Compound 5

## University of New Mexico Department of Chemistry

Method Name: C:\XZStart\Projects\WeiWang\z1s1632.met  
Data File: C:\XZStart\Projects\WeiWang\lgx1-83-7.dat  
Date Acquired: 1/28/2008 12:56:52 PM Date Printed: 01/28/2008 01:51:38 PM  
Sample ID: lgx1-83'

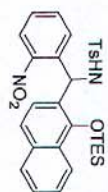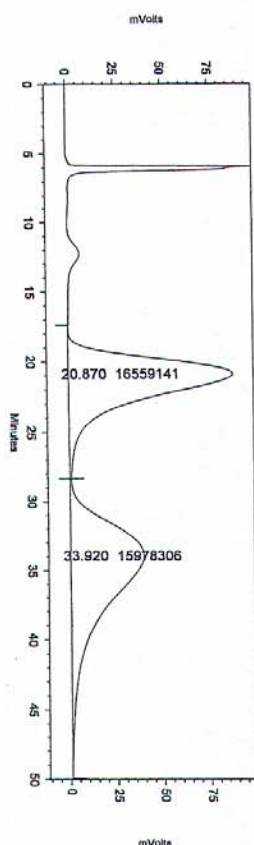

| SPD-10AVP<br>Ch1-254nm Results |        |          |         |
|--------------------------------|--------|----------|---------|
| Pk #                           | RT     | Area     | Area %  |
| 1                              | 20.870 | 16559141 | 50.893  |
| 2                              | 33.920 | 15978306 | 49.107  |
| Totals                         |        | 32537447 | 100.000 |

## University of New Mexico Department of Chemistry

Method Name: C:\XZStart\Projects\WeiWang\z1s1632.met  
Data File: C:\XZStart\Projects\WeiWang\lgx1-86'-2.dat  
Date Acquired: 1/28/2008 10:46:44 AM Date Printed: 01/28/2008 11:37:31 AM  
Sample ID: lgx1-86'

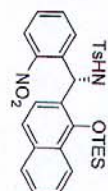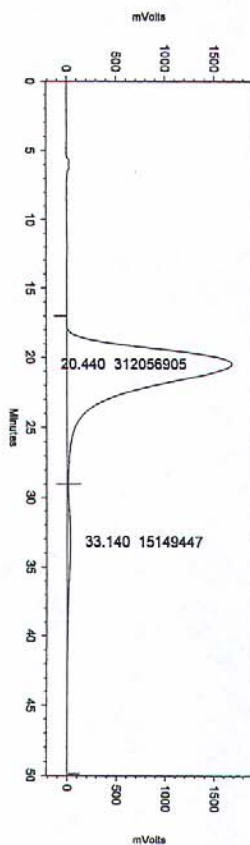

| SPD-10AVP<br>Ch1-255nm Results |        |           |         |
|--------------------------------|--------|-----------|---------|
| Pk #                           | RT     | Area      | Area %  |
| 1                              | 20.440 | 312056905 | 95.370  |
| 2                              | 33.140 | 15149447  | 4.630   |
| Totals                         |        | 327206352 | 100.000 |

University Of New Mexico  
Department of Chemistry

Method Name: C:\EZStart\Projects\WeiWang\01w.met  
Data File: C:\EZStart\Projects\WeiWang\1gx2-22-5.dat  
Date Acquired: 1/24/2008 4:25:24 PM Date Printed: 01/24/2008 05:01:12 PM  
Sample ID: 1gx2-22

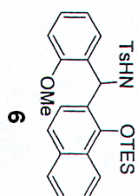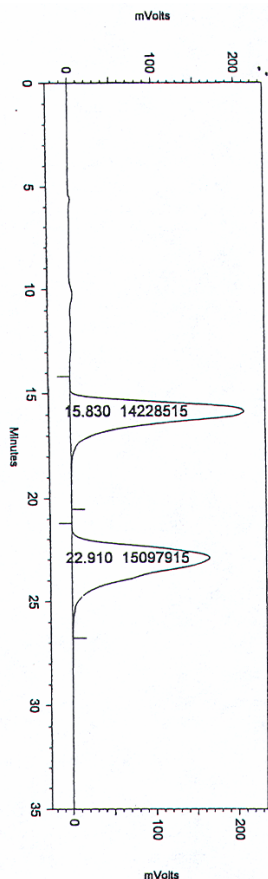

SPD-10AVP  
Ch1-254nm Results

| PK # | RT     | Area     | Area % |
|------|--------|----------|--------|
| 1    | 15.830 | 14228515 | 48.518 |
| 2    | 22.910 | 15097915 | 51.482 |

|        |          |         |
|--------|----------|---------|
| Totals | 29326430 | 100.000 |
|--------|----------|---------|

University Of New Mexico  
Department of Chemistry

Method Name: C:\EZStart\Projects\WeiWang\01w.met  
Data File: C:\EZStart\Projects\WeiWang\1gx2-28-1.dat  
Date Acquired: 1/24/2008 5:03:24 PM Date Printed: 01/25/2008 10:27:24 AM  
Sample ID: 1gx2-28

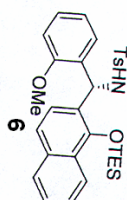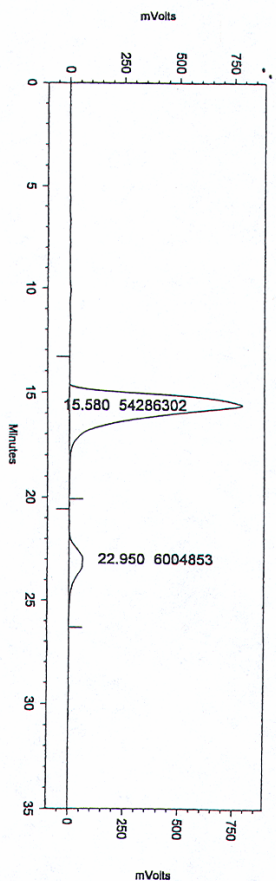

SPD-10AVP  
Ch1-254nm Results

| PK # | RT     | Area     | Area % |
|------|--------|----------|--------|
| 1    | 5.580  | 54286302 | 50.040 |
| 2    | 22.950 | 6004853  | 9.960  |

|        |          |         |
|--------|----------|---------|
| Totals | 60291155 | 100.000 |
|--------|----------|---------|

# University of New Mexico

## Department of Chemistry & Chemical Biology

Method Name: C:\EZStart\Projects\Default\Method\srthwrthwt.met  
 Data File: C:\EZStart\Projects\Default\Data\zsh\zsl-13-7-AS-H-70%-1.dat  
 Data Acquired: 12/26/2010 3:43:24 AM  
 Date Printed: 12/26/2010 4:38:05 AM  
 Sample ID: zsl-13-7

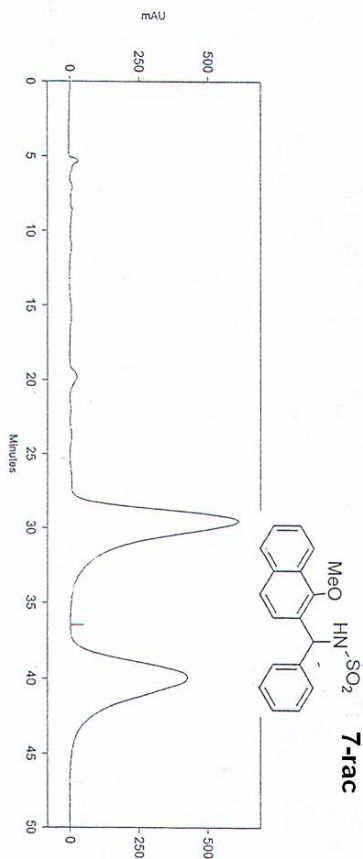

SPD-20A  
Ch2-210nm Results

| PK #   | Retention Time | Area      | Area Percent |
|--------|----------------|-----------|--------------|
| 1      | 29.517         | 85800275  | 53.398       |
| 2      | 39.892         | 74881267  | 46.602       |
| Totals |                | 160681542 | 100.000      |

# University of New Mexico

## Department of Chemistry & Chemical Biology

Method Name: C:\EZStart\Projects\Default\Method\srthwrthwt.met  
 Data File: C:\EZStart\Projects\Default\Data\zsh\zsl-13-10-AS-H-70%-2.dat  
 Data Acquired: 12/26/2010 7:29:45 AM  
 Date Printed: 12/26/2010 8:28:46 AM  
 Sample ID: zsl-13-10

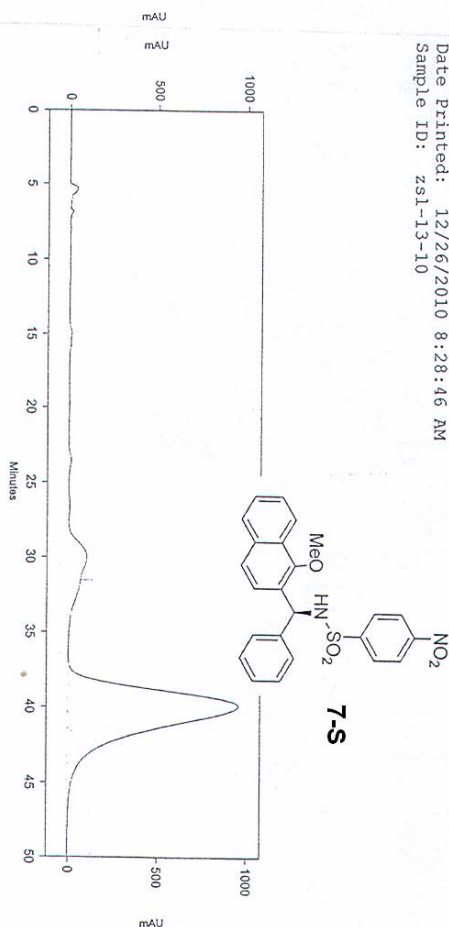

SPD-20A  
Ch2-210nm Results

| PK #   | Retention Time | Area      | Area Percent |
|--------|----------------|-----------|--------------|
| 1      | 30.058         | 14027217  | 7.602        |
| 2      | 39.883         | 170485519 | 92.398       |
| Totals |                | 184512736 | 100.000      |



**University of New Mexico**  
**Department of Chemistry & Chemical Biology**

Method Name: C:\EZStart\Projects\Default\Method\123.met  
 Data File: C:\EZStart\Projects\Default\Data\zsh\zsl-13-12-AS-H-60%-1.dat  
 Data Acquired: 12/29/2010 8:19:37 PM  
 Date Printed: 12/29/2010 9:42:12 PM  
 Sample ID: zsl-13-12

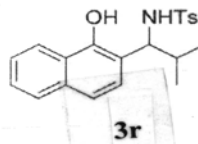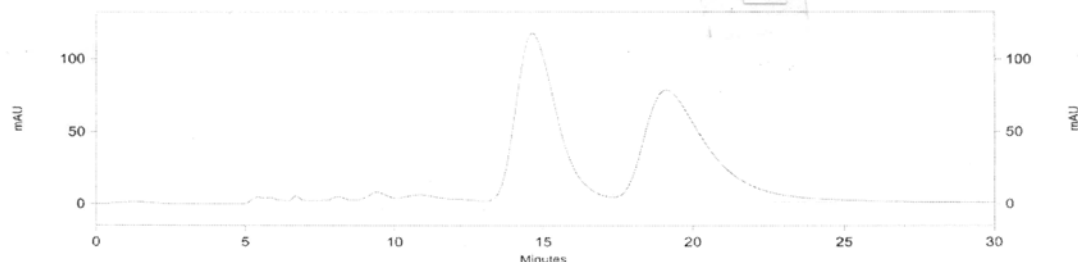

SPD-20A

Ch1-254nm Results

| Pk #   | Retention Time | Area     | Area Percent |
|--------|----------------|----------|--------------|
| 1      | 14.625         | 10986455 | 48.153       |
| 2      | 19.133         | 11829075 | 51.847       |
| Totals |                | 22815530 | 100.000      |

**University of New Mexico**  
**Department of Chemistry & Chemical Biology**

Method Name: C:\EZStart\Projects\Default\Method\srthwrthwrt.met  
 Data File: C:\EZStart\Projects\Default\Data\zsh\zsl-13-13-AS-H-60%-1.dat  
 Data Acquired: 12/29/2010 9:01:10 PM  
 Date Printed: 12/29/2010 9:39:50 PM  
 Sample ID: zsl-13-13

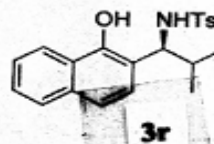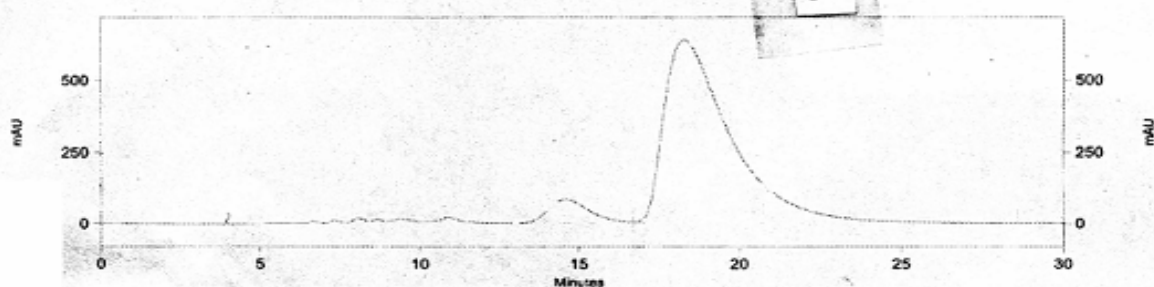

SPD-20A

Ch1-254nm Results

| Pk #   | Retention Time | Area      | Area Percent |
|--------|----------------|-----------|--------------|
| 1      | 14.592         | 7685302   | 7.624        |
| 2      | 18.292         | 93113453  | 92.376       |
| Totals |                | 100798755 | 100.000      |
